# Supplementary material for: Stokes shift/emission efficiency trade-off in donor–acceptor perylenemonoimides for luminescent solar concentrators
Source: Royal Society of Chemistry journal article supplement (doi:10.1039/c5ta01134e), 2015-01-01
Supplement: c5ta01134e1.pdf [file c5ta01134e1.pdf]

## **Stokes Shift/emission efficiency trade-off in Donor-Acceptor perylene monoimides for Luminescent Solar Concentrators.**

Riccardo Turrisi, Alessandro Sanguineti, Mauro Sassi, Brett Savoie, Atsuro Takai, Giorgio E. Patriarca, Matteo M. Salamone, Riccardo Ruffo, Gianfranco Vaccaro, Francesco Meinardi, Mark Ratner, Antonio Facchetti, Tobin J. Marks and Luca Beverina\*

### **Supporting Information**

- 1. Synthesis of all new compounds**
- 2. Table S1 and copy of the NMR mono and bidimensional spectra for derivatives 1-5**
- 3. Figure S1. Examples of absorption and emission spectra of D-A and TW compounds**
- 4. CV plots for derivatives 1-5**
- 5. Spectroelectrochemical characterization of derivatives 1-5**
- 6. Characterization of derivative 1 photostability in Chloroform solution**
- 7. General procedure for the LSC preparation**
- 8. Details of the computational investigation**
- 9. Details on the UPS measurements**
- 10. Supplementary data on time resolved transient absorption characterization of 5**
- 11. Figure S13. Tentative, unverified mechanism for the photochemical degradation of derivative 1.**
- 12. Details for the luminescence quantum yield measurements.**
- 13. References for the Supporting Information**

## 1. Synthesis of all new compounds

Derivatives **7**<sup>1</sup>, **8**<sup>2</sup> and **5**<sup>3</sup> were prepared according to the reported literature procedures, all other chemicals and solvents were purchased from Sigma Aldrich and Alfa Chemicals and used directly as received unless otherwise explicitly stated in the corresponding preparation. NMR spectra were recorded on a Bruker AMX Avance 500 MHz instrument. Microwave enhanced reactions were performed in a CEM Discover Instrument working under Dynamic conditions. Melting points are uncorrected.

Perylen monoimides **2-4** were prepared according to a standard Buckwald-Hartwig amination protocol, whereas derivative **1** was prepared by direct arylation of bromide **8** with 2-methylindolizine.

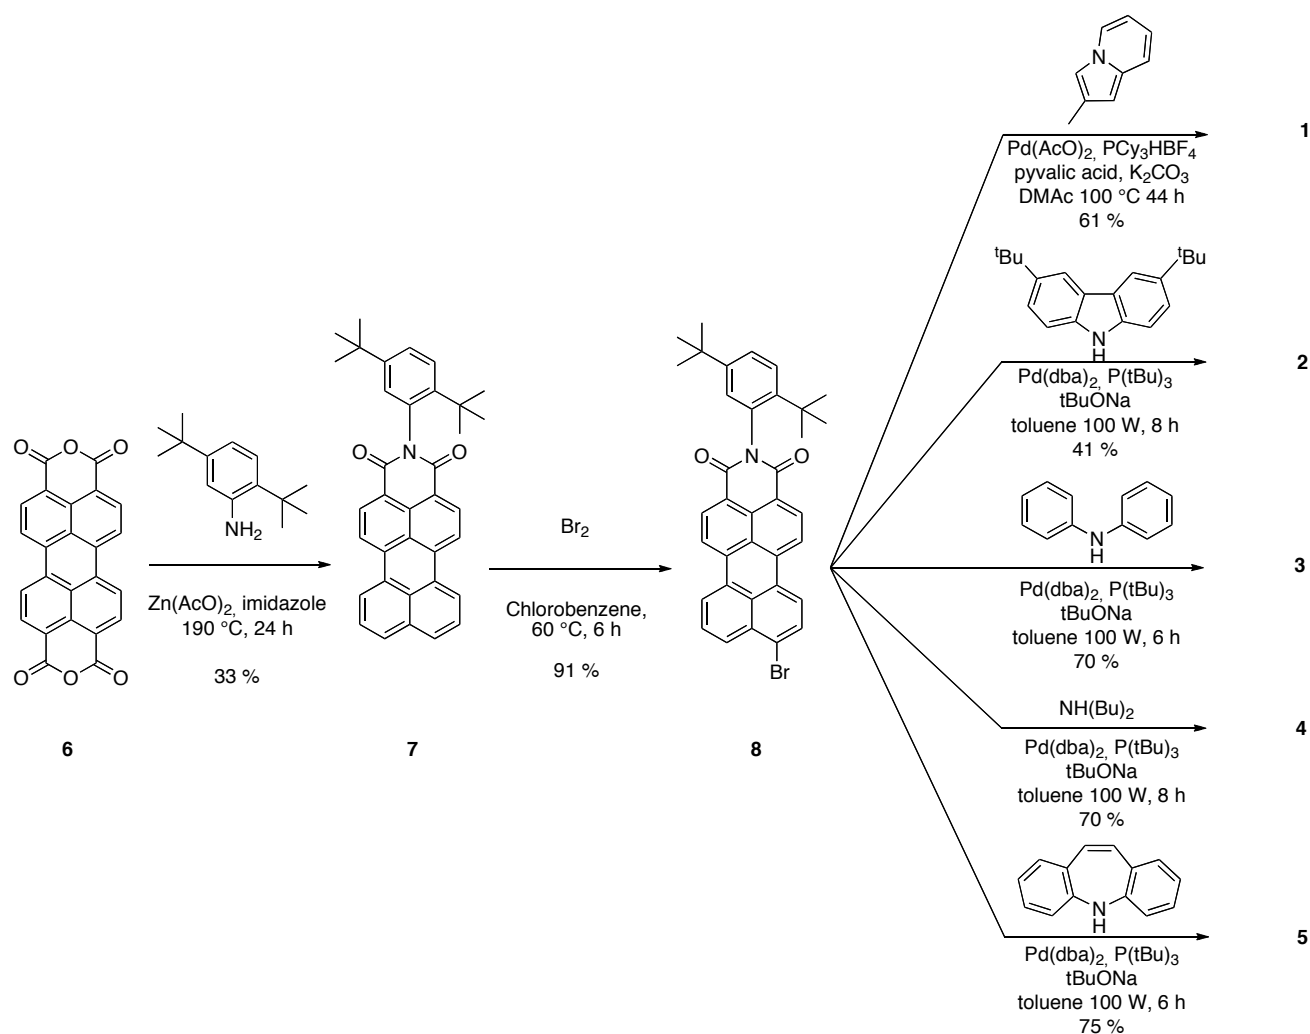

Scheme S1.

**General procedure for the synthesis of perylene monoimides according to B-H arylation.** 9-Bromo-*N*-(2,5-Di-*tert*-butylphenyl)perylene-3,4-dicarboximide **8** (600 mg, 1.019 mmol), sodium *tert*-butoxide (141 mg, 1.470 mmol) and the corresponding amine (1.0 eq), are loaded in a 100 mL two-neck round bottom flask equipped with a condenser under N<sub>2</sub> atmosphere. The mixture is suspended in anhydrous toluene (30 mL) and degassed with few vacuum/N<sub>2</sub> cycles. In a 25 mL two-neck round bottom flask, the catalyst is prepared: Pd(dba)<sub>2</sub> (30 mg, 0.051 mmol) is suspended in anhydrous toluene (5 mL) and P(<sup>*t*</sup>Bu)<sub>3</sub> (solution 1M in toluene) (0.12 mL, 0.102 mmol) is added. The mixture is left under stirring 15 min and then it is transferred into the reaction flask by standard cannula technique. The final reaction mixture is reacted under microwave irradiation in N<sub>2</sub> atmosphere. After the reported reaction time, the solvent is removed from the mixture and the crude solid is purified by column chromatography.

**Derivative 2.** Bromide **8** (600 mg, 1.019 mmol), 3,6-di-*tert*-butylcarbazole (313 mg, 1.120 mmol) and sodium *tert*-butoxide (141 mg, 1.470 mmol) are allowed to react under microwave irradiation (100 W, 8 h) under N<sub>2</sub> atmosphere. Solvent is removed and the dark crude solid is purified by column chromatography (silica, toluene/CH<sub>2</sub>Cl<sub>2</sub> 1:8) to give the title compound as a red solid (330 mg, 0.419 mmol, 41%). m.p. > 350 °C. <sup>1</sup>H NMR (500 MHz, Chloroform-*d*) δ[ppm]: 8.72 (d, 1H, J=7.9), 8.71 (d, 1H, J=7.8), 8.64 (d, 1H, J=8.2), 8.57 (d, 1H, J=8.4), 8.55-8.53 (m, 1H), 8.23 (d, 2H, J=1.7), 7.77 (d, 1H, J=8.0), 7.61 (d, 1H, J=8.6), 7.61-7.51 (m, 3H), 7.47 (dd, 1H, J=8.5, J=2.2), 7.45-7.42 (m, 2H), 7.05-7.02 (m, 3H), 1.49 (s, 18H), 1.34 (s, 9H), 1.33 (s, 9H); <sup>13</sup>C NMR (125.7 MHz, Chloroform-*d*) δ[ppm]: 165.8, 150.9, 144.7, 144.1, 141.3, 138.2, 138.1, 137.8, 133.9, 132.9, 132.8, 132.7, 131.2, 130.8, 130.4, 130.3, 129.6, 128.7, 128.6, 128.3, 127.9, 127.8, 127.0, 125.3, 124.8, 124.7, 124.5, 122.6, 121.6, 121.5, 117.3, 110.4, 36.4, 35.7, 35.1, 32.9, 32.6, 32.1. Anal. Calcd for C<sub>56</sub>H<sub>54</sub>N<sub>2</sub>O<sub>2</sub>: C, 85.46; H, 6.92; N, 3.56. Found: C, 85.57; H, 6.83; N, 3.64.

**Derivative 3.** Bromide **8** (600 mg, 1.019 mmol), diphenylamine (203 mg, 1.020 mmol) and sodium *tert*-butoxide (141 mg, 1.470 mmol) are allowed to react under microwave irradiation (100 W, 6 h) under a N<sub>2</sub> atmosphere. The solvent is removed and the crude purple solid residue is purified by column chromatography (silica, toluene/AcOEt 9:1) to give the title compound as a violet solid (480 mg, 0.710 mmol, 70%). m.p. 300 °C. <sup>1</sup>H NMR (500 MHz, Chloroform-*d*) δ[ppm]: 8.66 (d, 1H, J=8.0), 8.65 (d, 1H, J=8.0), 8.48 (d, 2H, J=7.7), 8.45 (d, 1H, J=7.9), 8.39 (d, 1H, J=8.2), 8.05 (d, 1H, J=8.4), 7.59 (d, 1H, J=8.6), 7.49 (t, 1H, J=8.0), 7.45 (dd, 1H, J=8.6, J=2.2), 7.41 (d, 1H, J=8.1), 7.28-7.25 (m, 4H), 7.10 (d, 4H, J=7.7), 7.05-7.02 (m, 3H), 1.33 (s, 9H), 1.31 (s, 9H); <sup>13</sup>C NMR (125.7 MHz, Chloroform-*d*) δ[ppm]: 165.9, 150.8, 149.2, 147.9, 144.7, 138.4, 138.3, 134.0, 132.9, 132.8, 132.2, 131.2, 130.7, 130.3, 129.7, 128.7, 128.5, 128.3, 128.0, 127.6, 127.5, 127.0, 125.6,

125.0, 123.8, 123.7, 122.2, 121.7, 121.1, 120.8, 36.4, 35.1, 32.6, 32.1. Anal. Calcd for  $C_{48}H_{40}N_2O_2$ : C, 85.18; H, 5.96; N, 4.14. Found: C, 85.24; H, 5.91; N, 4.09.

Derivative **4**. Bromide **8** (600 mg, 1.019 mmol), dibutylamine (132 mg, 1.021 mmol) and sodium tert-butoxide (141 mg, 1.470 mmol) are allowed to react under microwave irradiation (100 W, 8 h) under  $N_2$  atmosphere. Solvent is removed and the dark-purple solid residue is purified by column chromatography (silica, AcOEt/ETP 2:8) to give the title compound as a purple solid (300 mg, 0.471 mmol, 46%). M.p. = 155 °C.  $^1H$  NMR (500 MHz, Chloroform-*d*)  $\delta$ [ppm]: 8.64 (d, 1H,  $J=8.1$ ), 8.62 (d, 1H,  $J=8.2$ ), 8.50 (d, 1H,  $J=7.4$ ), 8.42 (t, 2H,  $J=8.9$ ), 8.34 (t, 2H,  $J=8.6$ ), 7.63 (t, 1H,  $J=7.9$ ), 7.59 (d, 1H,  $J=9.0$ ), 7.44 (dd, 1H,  $J=8.6$ ,  $J=2.2$ ), 7.6 (d, 1H,  $J=8.1$ ), 7.02 (d, 1H,  $J=2.2$ ) 3.30 (t, 4H,  $J=7.4$ ), 1.61-1.55 (m, 4H), 1.33 (s, 9H), 1.30 (s, 9H), 0.89 (t, 6H,  $J=7.3$ );  $^{13}C$  NMR (125.7 MHz, Chloroform-*d*)  $\delta$ [ppm]: 166.0, 165.9, 153.3, 150.8, 144.7, 139.1, 138.9, 134.2, 132.9, 132.7, 131.4, 131.3, 130.4, 130.3, 129.5, 128.8, 128.5, 127.5, 126.9, 126.8, 125.4, 125.0, 124.1, 121.8, 120.6, 120.5, 119.7, 119.2, 54.5, 36.4, 35.1, 32.6, 32.1, 30.2, 21.3, 14.8. Anal. Calcd for  $C_{44}H_{48}N_2O_2$ : C, 82.98; H, 4.40; N, 7.60. Found: C, 82.72; H, 4.23; N, 7.67.

Derivative **1**. Bromide **8** (600 mg, 1.019 mmol),  $Pd(AcO)_2$  (3.00 mg, 13.36  $\mu$ mol), pivalic acid (33 mg, 0.323 mmol),  $K_2CO_3$  (211 mg, 1.529 mmol), tricyclohexylphosphine tetrafluoroborate (7.80 mg, 21.18  $\mu$ mol) and 2-methylindolizine (147 mg, 1.121 mmol) are loaded in a screw-capped tube under Argon atmosphere. The mixture is suspended in anhydrous DMAc (3.5 mL) and then stirred at 100 °C for 44 h. The mixture is poured into water (100 mL) to give a solid precipitate that is isolated by filtration and purified by column chromatography (silica,  $CH_2Cl_2$ /Toluene 10:1) to give the title compound as a purple solid (400 mg, 0.626 mmol, 61%). M.p. = 230 °C.  $^1H$  NMR (500 MHz, Chloroform-*d*)  $\delta$ [ppm]: 8.70 (d, 1H,  $J=7.9$ ), 8.69 (d, 1H,  $J=7.9$ ), 8.61 (d, 1H,  $J=7.8$ ), 8.54-8.51 (m, 3H), 7.73 (d, 1H,  $J=7.7$ ), 7.61-7.50 (m, 4H), 7.46 (dd, 1H,  $J=8.6$ ,  $J=2.1$ ), 7.42 (d, 1H,  $J=9.0$ ), 7.04 (bs, 1H), 6.72 (t, 1H,  $J=7.7$ ), 6.54 (bs, 1H), 6.40-6.36 (m, 1H), 2.27-2.25 (m, 3H), 1.34 (s, 9H), 1.32 (s, 9H);  $^{13}C$  NMR (125.7 MHz, Chloroform-*d*)  $\delta$ [ppm]: 165.8, 150.9, 144.6, 138.4, 138.2, 134.4, 134.0, 133.9, 133.4, 132.9, 131.5, 131.4, 131.2, 130.7, 130.2, 130.1, 130.0, 128.7, 128.4, 127.8, 127.0, 126.1, 124.9, 124.6, 124.0, 122.3, 121.3, 121.2, 120.6, 119.3, 118.2, 110.9, 101.8, 36.4, 35.1, 32.6, 32.1, 13.3. Anal. Calcd for  $C_{45}H_{38}N_2O_2$ : C, 84.61; H, 6.00; N, 4.39. Found: C, 84.47; H, 5.99; N, 4.56.

## 2. Copy of the NMR spectra and Table S1.

2.1. Table S1.  $^1\text{H}$  and  $^{13}\text{C}$  NMR chemical shifts for selected position of derivatives 1-5.

|            | Perylene ring position and nucleus |                          |                       |                          |                       |                          |                       |                          |                           |
|------------|------------------------------------|--------------------------|-----------------------|--------------------------|-----------------------|--------------------------|-----------------------|--------------------------|---------------------------|
| Derivative | <b>5</b> $^1\text{H}$              | <b>5</b> $^{13}\text{C}$ | <b>6</b> $^1\text{H}$ | <b>6</b> $^{13}\text{C}$ | <b>7</b> $^1\text{H}$ | <b>7</b> $^{13}\text{C}$ | <b>8</b> $^1\text{H}$ | <b>8</b> $^{13}\text{C}$ | <b>6b</b> $^{13}\text{C}$ |
| <b>1</b>   | 8.69                               | 132.90                   | 8.52                  | 121.32                   | 8.61                  | 124.62                   | 7.73                  | 131.48                   | 130.26                    |
| <b>2</b>   | 8.72                               | 132.90                   | 8.54                  | 121.57                   | 8.64                  | 124.82                   | 7.77                  | 128.34                   | 130.40                    |
| <b>3</b>   | 8.65                               | 132.82                   | 8.39                  | 121.73                   | 8.45                  | 125.57                   | 7.41                  | 128.26                   | 127.64                    |
| <b>4</b>   | 8.60                               | 132.92                   | 8.30                  | 119.64                   | 8.38                  | 125.44                   | 7.25                  | 119.19                   | 124.10                    |
| <b>5</b>   | 8.55                               | 132.97                   | 8.29                  | 120.41                   | 8.29                  | 124.92                   | 7.28                  | 127.21                   | 123.81                    |

## 2.2. Derivative 1.

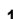<sup>1</sup>H full spectral range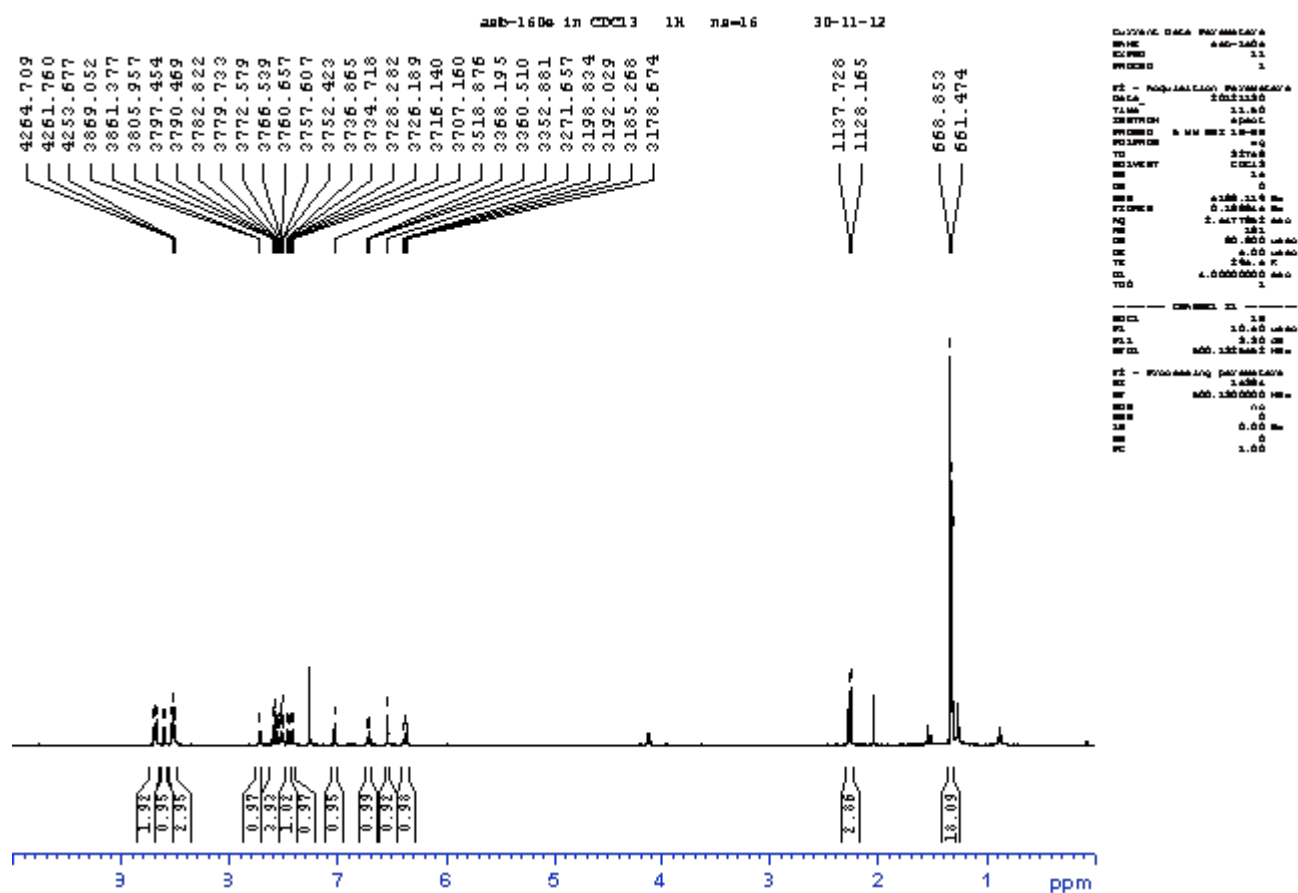

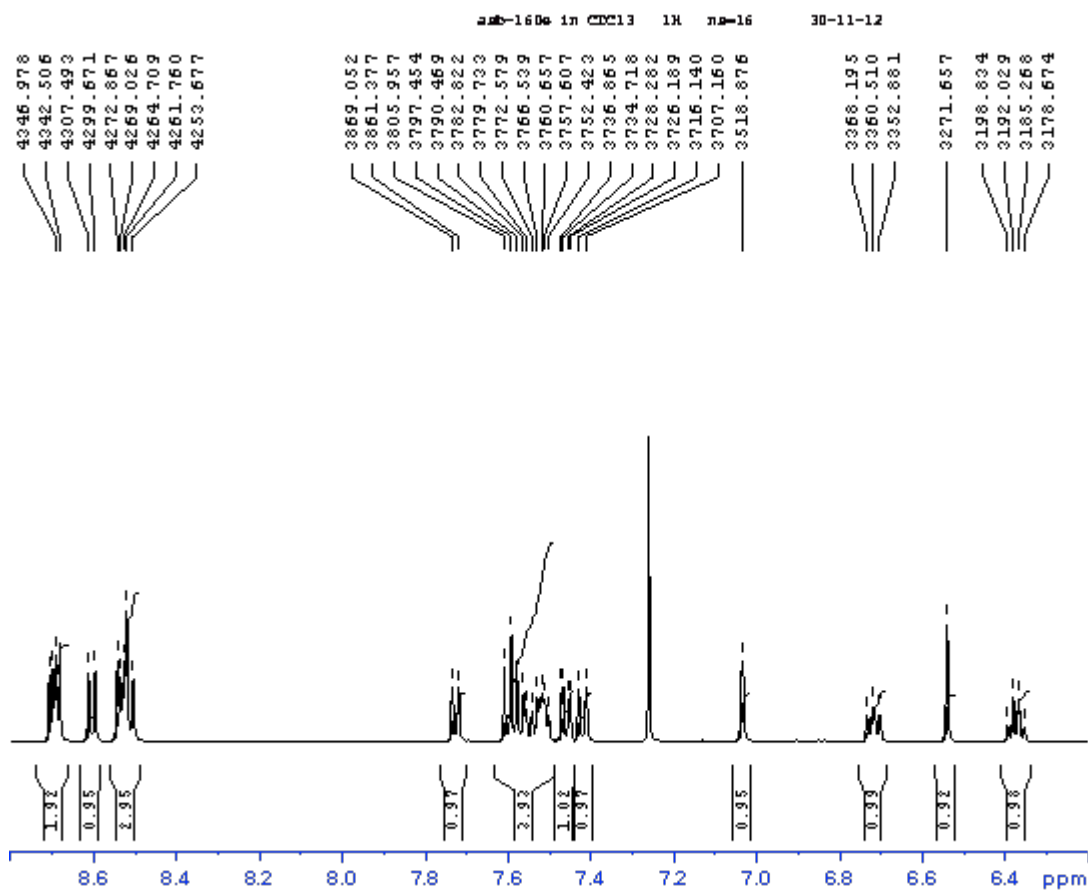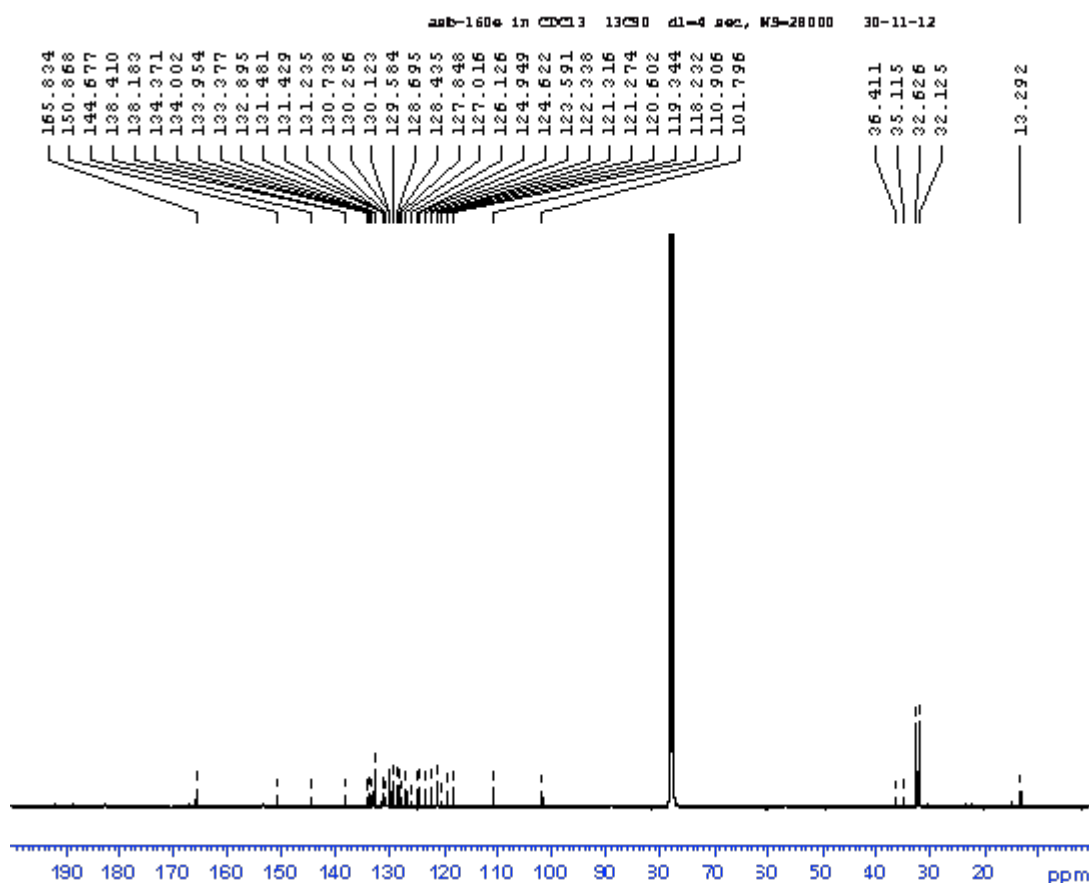

165.834  
 150.868  
 144.677  
 138.410  
 138.182  
 134.371  
 134.002  
 133.954  
 133.377  
 132.895  
 131.481  
 131.429  
 131.235  
 130.738  
 130.256  
 130.123  
 129.584  
 128.695  
 128.435  
 127.848  
 127.016  
 126.126  
 124.949  
 124.622  
 123.591  
 122.338  
 121.316  
 121.274  
 120.502  
 119.344  
 118.232  
 110.906  
 101.796

[illegible]



# <sup>1</sup>H COSY full spectral range

asb-160e in CDCl<sub>3</sub>

COSYGPQF

TD=1024-128, NS=16 20-11-2012

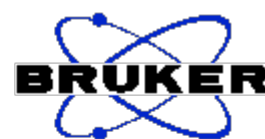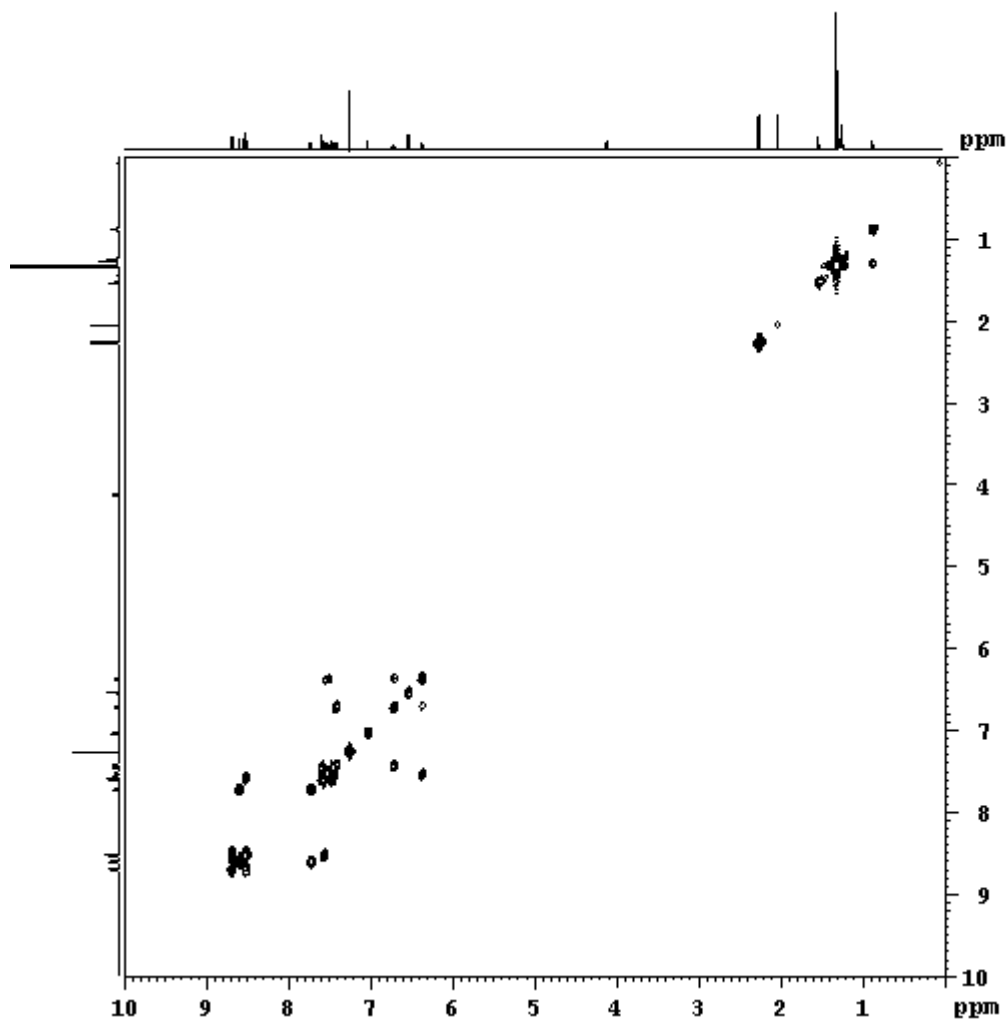

Current Data Parameters  
NAME asb-160e  
EXPNO 2  
PROCNO 1

F2 - Acquisition Parameters  
Date\_ 20121130  
Time 16.42  
INSTRUM spect  
PROBHD 5 mm BBI 1H-400  
PULPROG zgpg30  
PC 1024  
SOLVENT CDCl<sub>3</sub>  
DS 16  
SS 16  
SFO 500.136119 MHz  
FIDRES 0.000085 MHz  
AQ 0.0828700 sec  
RG 514.0  
IN 60.000 cm/s  
DE 6.00 cm/s  
TE 296.0 K  
d0 0.0000000 sec  
d1 2.0000000 sec  
d15 0.0000000 sec  
d16 0.0000000 sec  
d20 0.0000000 sec

===== CHANNEL f1 =====  
NUC1 1H  
P0 6.00 cm/s  
F1 10.60 cm/s  
PC1 5.00 cm  
SFO1 500.1325652 MHz

===== CHANNEL f2 =====  
CPDPRG2 SFG2.100  
NUC2 13C  
PC2 10.00 cm  
SFO2 101.625127 MHz  
F15 1000.00 cm/s

F1 - Acquisition Parameters  
EXPNO 1  
PC 128  
SFO1 500.1326 MHz  
FIDRES 48.34677 Hz  
RG 12.512  
INSTRUM spect

F2 - Processing parameters  
SI 1024  
SF 500.1300000 MHz  
WDW SINC  
SS 0  
LB 0.00 Hz  
GB 0  
MC 0.60

F1 - Processing parameters  
SI 1024  
PC 128  
SF 500.1300000 MHz  
WDW SINC  
SS 0  
LB 0.00 Hz  
GB 0

# Aromatic region

asb-160e in CDCl<sub>3</sub>

COSYGPQF TD=1024-128, NS=16 20-11-2012

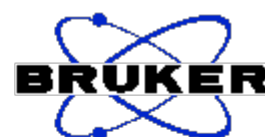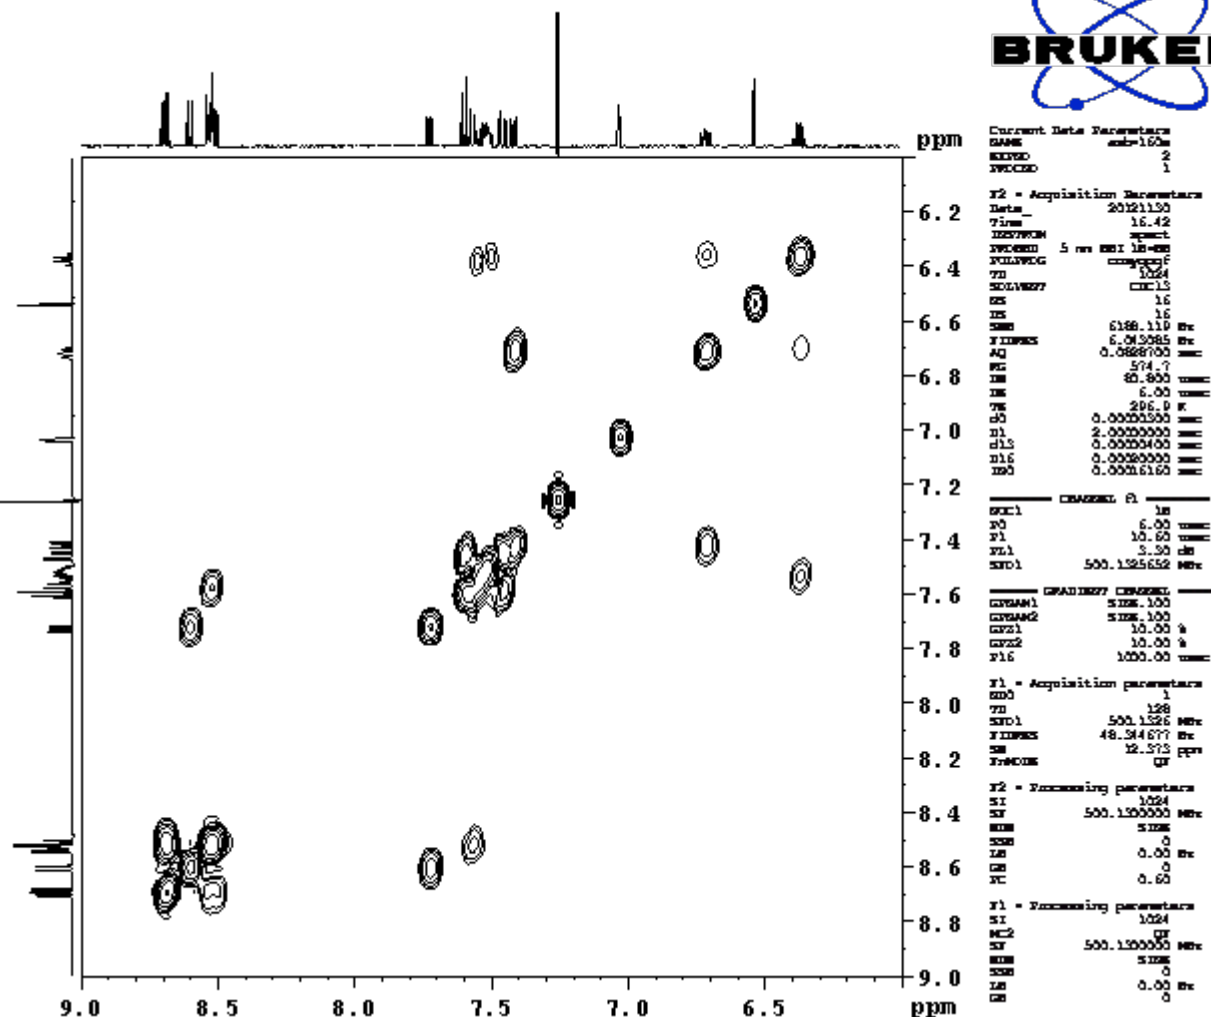

## asb-160g in CDC13 13C CORR 30-11-2013

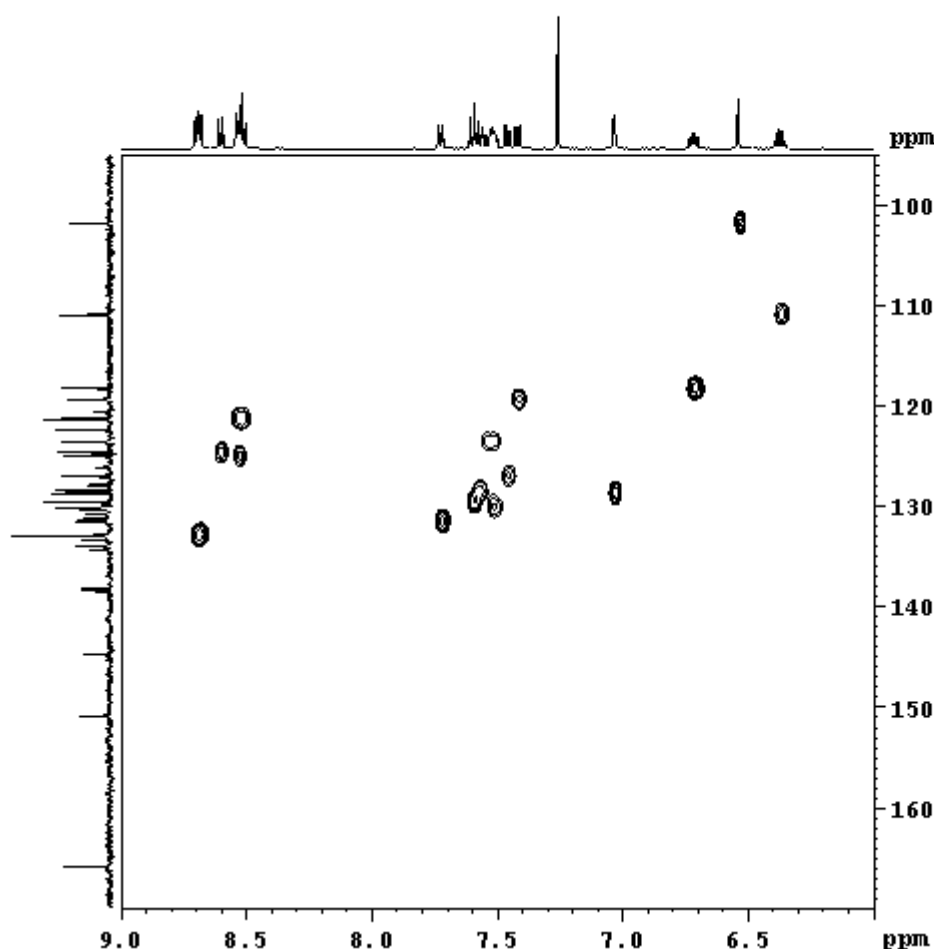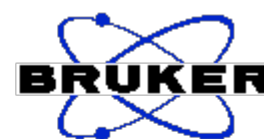[illegible]

$^1\text{H } ^{13}\text{C}$  HETCOR long range coupling - full spectral range

asb-160e in CDC13 1H-13C CORR LONG RANGE D6 corretto!! 30-11-2012

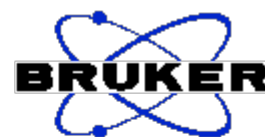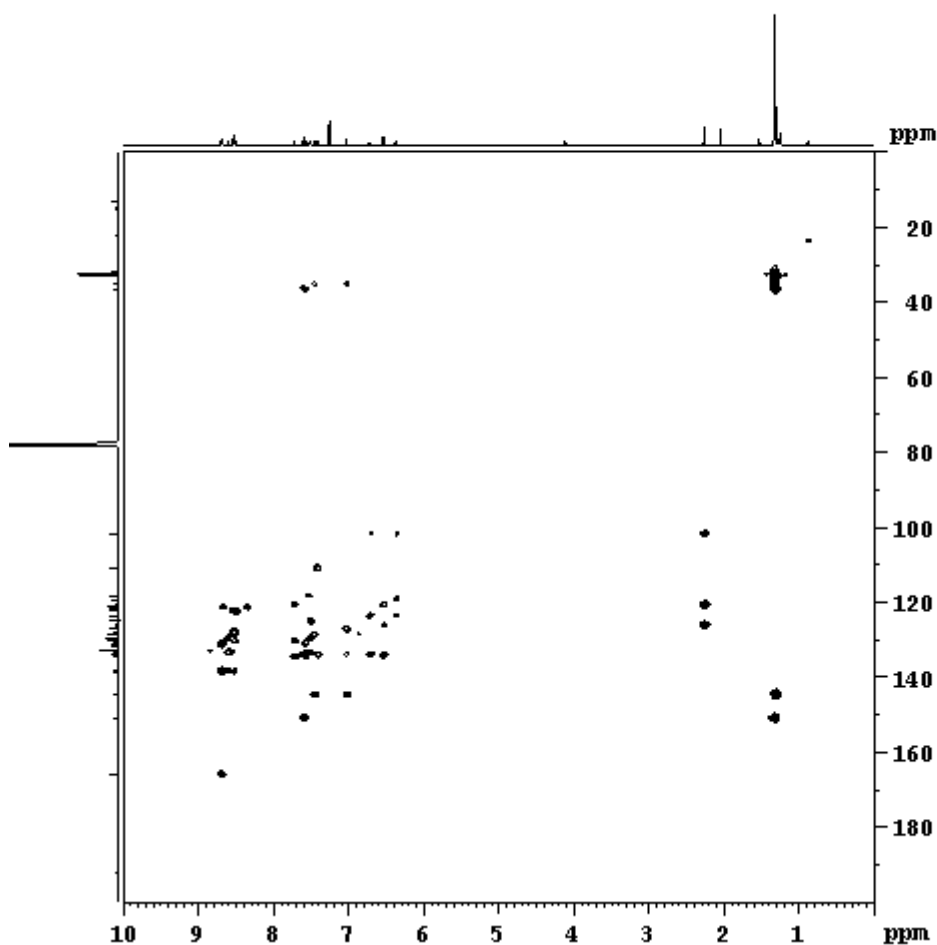[illegible]

asb-160g in CDC13 1H-13C CORB LONG RANGE D6 corrected!! 30-11-2012

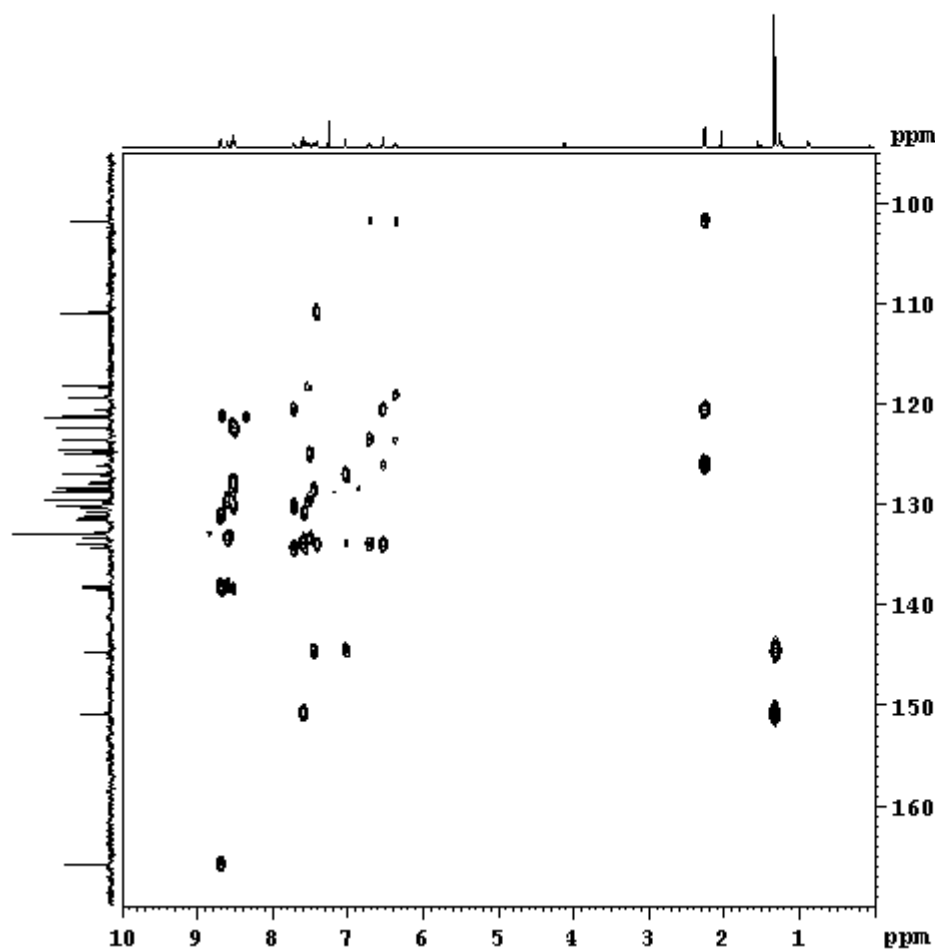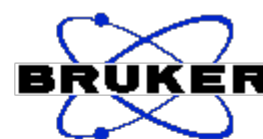

```

Current Data Parameters
NAME          val=-10.00
RSTART        1
RSTOP         1

PS - Acquisition Parameters
Date          20171203
Time          13.07
DETECTOR      apc02
PULPROG       3  sm 001 10-00
NOISEPROG     hrcpccp02
IC            10
NOISELEVEL    0.0013
CG            32
MC            1
SFO           4166.114  Hz
PCP000        0.430389  Hz
PCP010        0.0838703  Hz
PCP020        0.0133333  Hz
PCP030        0.00333333  Hz
PCP040        145.0000003  Hz
PCP050        8.0000000  Hz
PCP060        0.00000000  Hz
PCP070        0.00000000  Hz
PCP080        0.00000000  Hz
PCP090        0.00000000  Hz
PCP100        0.00000000  Hz
PCP110        0.00000000  Hz
PCP120        0.00000000  Hz
PCP130        0.00000000  Hz
PCP140        0.00000000  Hz
PCP150        0.00000000  Hz
PCP160        0.00000000  Hz
PCP170        0.00000000  Hz
PCP180        0.00000000  Hz
PCP190        0.00000000  Hz
PCP200        0.00000000  Hz
PCP210        0.00000000  Hz
PCP220        0.00000000  Hz
PCP230        0.00000000  Hz
PCP240        0.00000000  Hz
PCP250        0.00000000  Hz
PCP260        0.00000000  Hz
PCP270        0.00000000  Hz
PCP280        0.00000000  Hz
PCP290        0.00000000  Hz
PCP300        0.00000000  Hz
PCP310        0.00000000  Hz
PCP320        0.00000000  Hz
PCP330        0.00000000  Hz
PCP340        0.00000000  Hz
PCP350        0.00000000  Hz
PCP360        0.00000000  Hz
PCP370        0.00000000  Hz
PCP380        0.00000000  Hz
PCP390        0.00000000  Hz
PCP400        0.00000000  Hz
PCP410        0.00000000  Hz
PCP420        0.00000000  Hz
PCP430        0.00000000  Hz
PCP440        0.00000000  Hz
PCP450        0.00000000  Hz
PCP460        0.00000000  Hz
PCP470        0.00000000  Hz
PCP480        0.00000000  Hz
PCP490        0.00000000  Hz
PCP500        0.00000000  Hz
PCP510        0.00000000  Hz
PCP520        0.00000000  Hz
PCP530        0.00000000  Hz
PCP540        0.00000000  Hz
PCP550        0.00000000  Hz
PCP560        0.00000000  Hz
PCP570        0.00000000  Hz
PCP580        0.00000000  Hz
PCP590        0.00000000  Hz
PCP600        0.00000000  Hz
PCP610        0.00000000  Hz
PCP620        0.00000000  Hz
PCP630        0.00000000  Hz
PCP640        0.00000000  Hz
PCP650        0.00000000  Hz
PCP660        0.00000000  Hz
PCP670        0.00000000  Hz
PCP680        0.00000000  Hz
PCP690        0.00000000  Hz
PCP700        0.00000000  Hz
PCP710        0.00000000  Hz
PCP720        0.00000000  Hz
PCP730        0.00000000  Hz
PCP740        0.00000000  Hz
PCP750        0.00000000  Hz
PCP760        0.00000000  Hz
PCP770        0.00000000  Hz
PCP780        0.00000000  Hz
PCP790        0.00000000  Hz
PCP800        0.00000000  Hz
PCP810        0.00000000  Hz
PCP820        0.00000000  Hz
PCP830        0.00000000  Hz
PCP840        0.00000000  Hz
PCP850        0.00000000  Hz
PCP860        0.00000000  Hz
PCP870        0.00000000  Hz
PCP880        0.00000000  Hz
PCP890        0.00000000  Hz
PCP900        0.00000000  Hz
PCP910        0.00000000  Hz
PCP920        0.00000000  Hz
PCP930        0.00000000  Hz
PCP940        0.00000000  Hz
PCP950        0.00000000  Hz
PCP960        0.00000000  Hz
PCP970        0.00000000  Hz
PCP980        0.00000000  Hz
PCP990        0.00000000  Hz
PCP1000       0.00000000  Hz
PCP1010       0.00000000  Hz
PCP1020       0.00000000  Hz
PCP1030       0.00000000  Hz
PCP1040       0.00000000  Hz
PCP1050       0.00000000  Hz
PCP1060       0.00000000  Hz
PCP1070       0.00000000  Hz
PCP1080       0.00000000  Hz
PCP1090       0.00000000  Hz
PCP1100       0.00000000  Hz
PCP1110       0.00000000  Hz
PCP1120       0.00000000  Hz
PCP1130       0.00000000  Hz
PCP1140       0.00000000  Hz
PCP1150       0.00000000  Hz
PCP1160       0.00000000  Hz
PCP1170       0.00000000  Hz
PCP1180       0.00000000  Hz
PCP1190       0.00000000  Hz
PCP1200       0.00000000  Hz
PCP1210       0.00000000  Hz
PCP1220       0.00000000  Hz
PCP1230       0.00000000  Hz
PCP1240       0.00000000  Hz
PCP1250       0.00000000  Hz
PCP1260       0.00000000  Hz
PCP1270       0.00000000  Hz
PCP1280       0.00000000  Hz
PCP1290       0.00000000  Hz
PCP1300       0.00000000  Hz
PCP1310       0.00000000  Hz
PCP1320       0.00000000  Hz
PCP1330       0.00000000  Hz
PCP1340       0.00000000  Hz
PCP1350       0.00000000  Hz
PCP1360       0.00000000  Hz
PCP1370       0.00000000  Hz
PCP1380       0.00000000  Hz
PCP1390       0.00000000  Hz
PCP1400       0.00000000  Hz
PCP1410       0.00000000  Hz
PCP1420       0.00000000  Hz
PCP1430       0.00000000  Hz
PCP1440       0.00000000  Hz
PCP1450       0.00000000  Hz
PCP1460       0.00000000  Hz
PCP1470       0.00000000  Hz
PCP1480       0.00000000  Hz
PCP1490       0.00000000  Hz
PCP1500       0.00000000  Hz
PCP1510       0.00000000  Hz
PCP1520       0.00000000  Hz
PCP1530       0.00000000  Hz
PCP1540       0.00000000  Hz
PCP1550       0.00000000  Hz
PCP1560       0.00000000  Hz
PCP1570       0.00000000  Hz
PCP1580       0.00000000  Hz
PCP1590       0.00000000  Hz
PCP1600       0.00000000  Hz
PCP1610       0.00000000  Hz
PCP1620       0.00000000  Hz
PCP1630       0.00000000  Hz
PCP1640       0.00000000  Hz
PCP1650       0.00000000  Hz
PCP1660       0.00000000  Hz
PCP1670       0.00000000  Hz
PCP1680       0.00000000  Hz
PCP1690       0.00000000  Hz
PCP1700       0.00000000  Hz
PCP1710       0.00000000  Hz
PCP1720       0.00000000  Hz
PCP1730       0.00000000  Hz
PCP1740       0.00000000  Hz
PCP1750       0.00000000  Hz
PCP1760       0.00000000  Hz
PCP1770       0.00000000  Hz
PCP1780       0.00000000  Hz
PCP1790       0.00000000  Hz
PCP1800       0.00000000  Hz
PCP1810       0.00000000  Hz
PCP1820       0.00000000  Hz
PCP1830       0.00000000  Hz
PCP1840       0.00000000  Hz
PCP1850       0.00000000  Hz
PCP1860       0.00000000  Hz
PCP1870       0.00000000  Hz
PCP1880       0.00000000  Hz
PCP1890       0.00000000  Hz
PCP1900       0.00000000  Hz
PCP1910       0.00000000  Hz
PCP1920       0.00000000  Hz
PCP1930
```

### 2.3. Derivative 2.

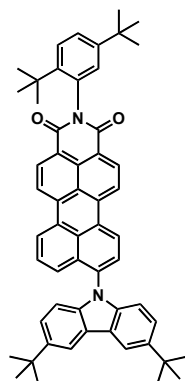

2

<sup>1</sup>H full spectral range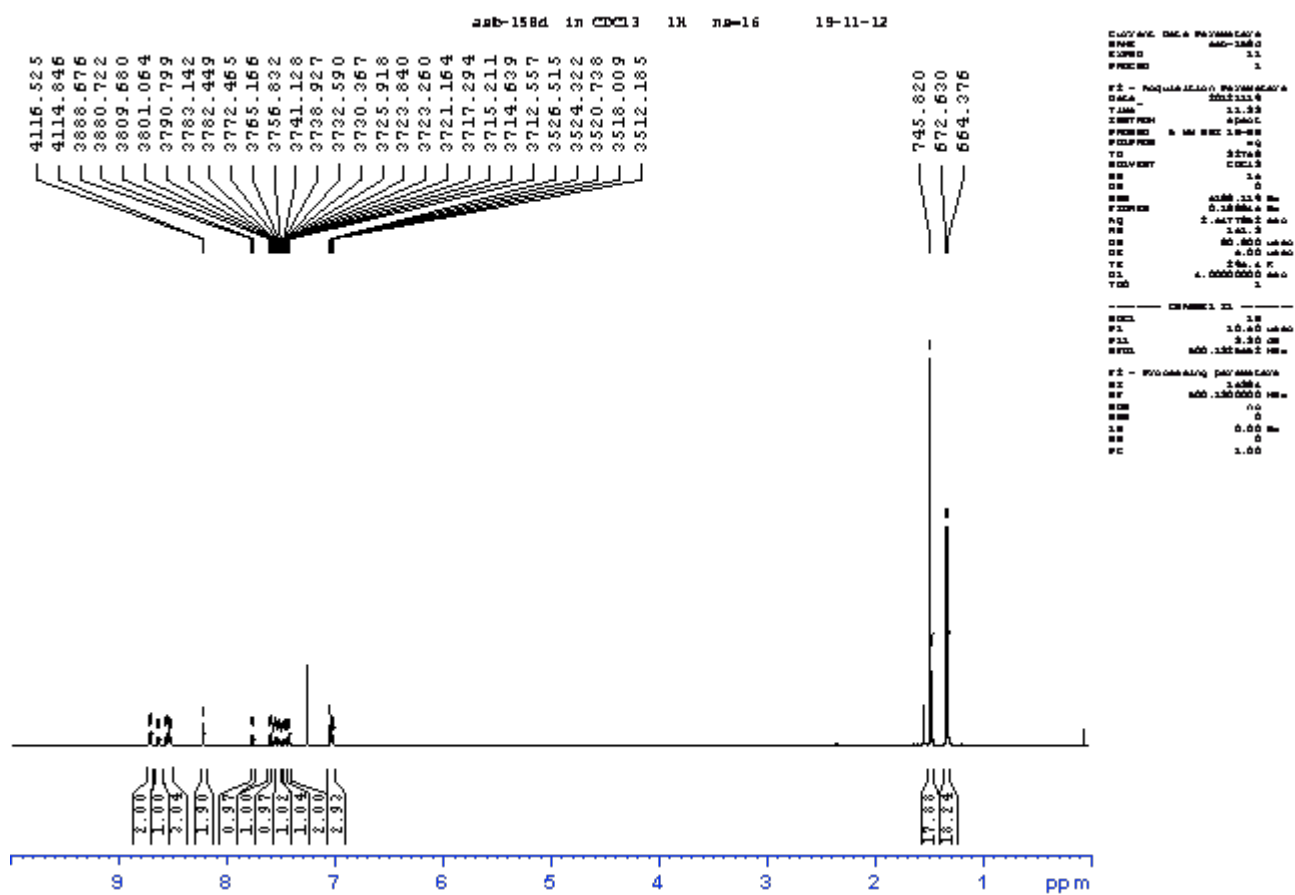

Aromatic region

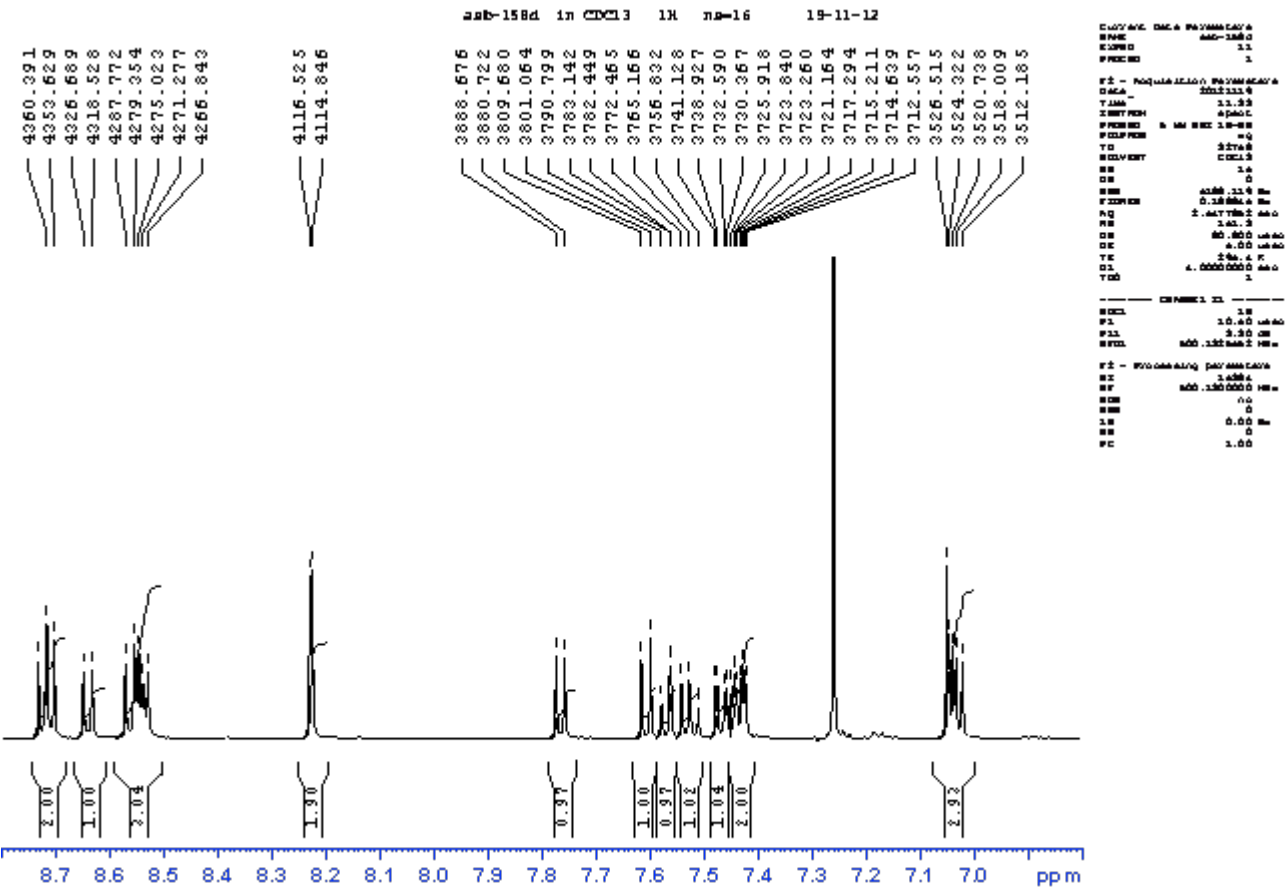

2.4 2.3 2.2 2.1 2.0 1.9 1.8 1.7 1.6 1.5 1.4 1.3 1.2 1.1 1.0 0.9 0.8 0.7 ppm

[illegible]



<sup>13</sup>C full spectral range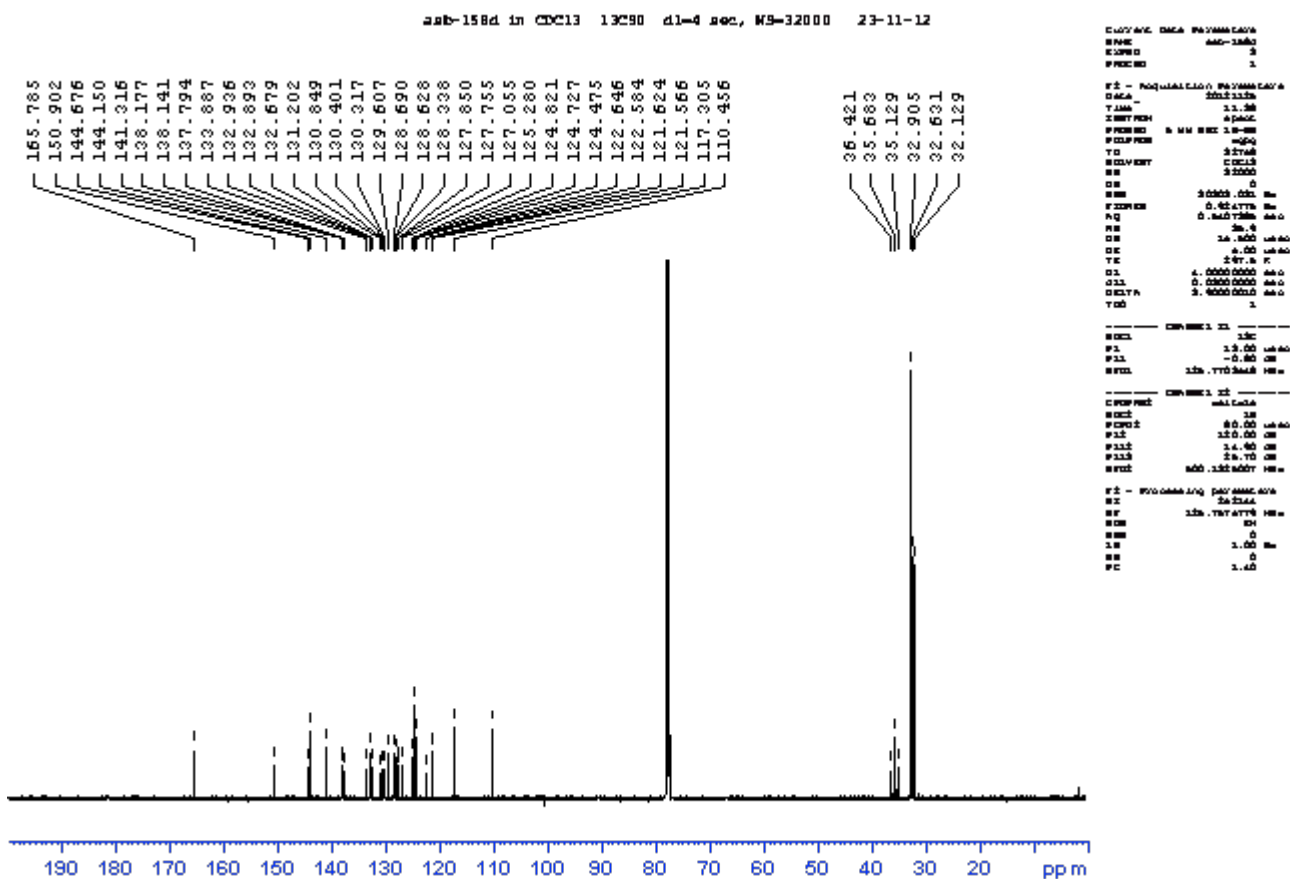

<sup>13</sup>C NMR spectrum of compound 158d in CDCl<sub>3</sub>. The spectrum shows peaks from 110 to 166 ppm. The following table lists the chemical shifts (ppm) for the observed peaks:

| Chemical Shift (ppm) |
|----------------------|
| 165.785              |
| 150.902              |
| 144.676              |
| 144.150              |
| 141.316              |
| 138.177              |
| 138.141              |
| 137.794              |
| 133.887              |
| 132.936              |
| 132.893              |
| 132.679              |
| 131.202              |
| 130.849              |
| 130.401              |
| 130.317              |
| 129.607              |
| 128.690              |
| 128.628              |
| 128.338              |
| 127.850              |
| 127.755              |
| 127.055              |
| 125.280              |
| 124.821              |
| 124.727              |
| 124.475              |
| 122.646              |
| 122.584              |
| 121.624              |
| 121.566              |
| 117.305              |
| 110.456              |

[illegible]

sub-158d in CDCl<sub>3</sub> 13C90 d1=4 sec, W9=32000 23-11-12

36.421  
35.683  
35.129  
32.905  
32.631  
32.129

80 75 70 65 60 55 50 45 40 35 30 25 20 15 10 5 ppm

sub-158d in CDC13 13C90 dl-d noc, WS-32000 23-11-12

[illegible]

$^1\text{H}$  COSY full spectral range

C O3 YGPQF

TD=1024-128, NS=16

23-11-2012

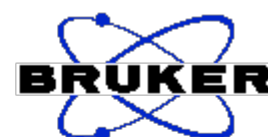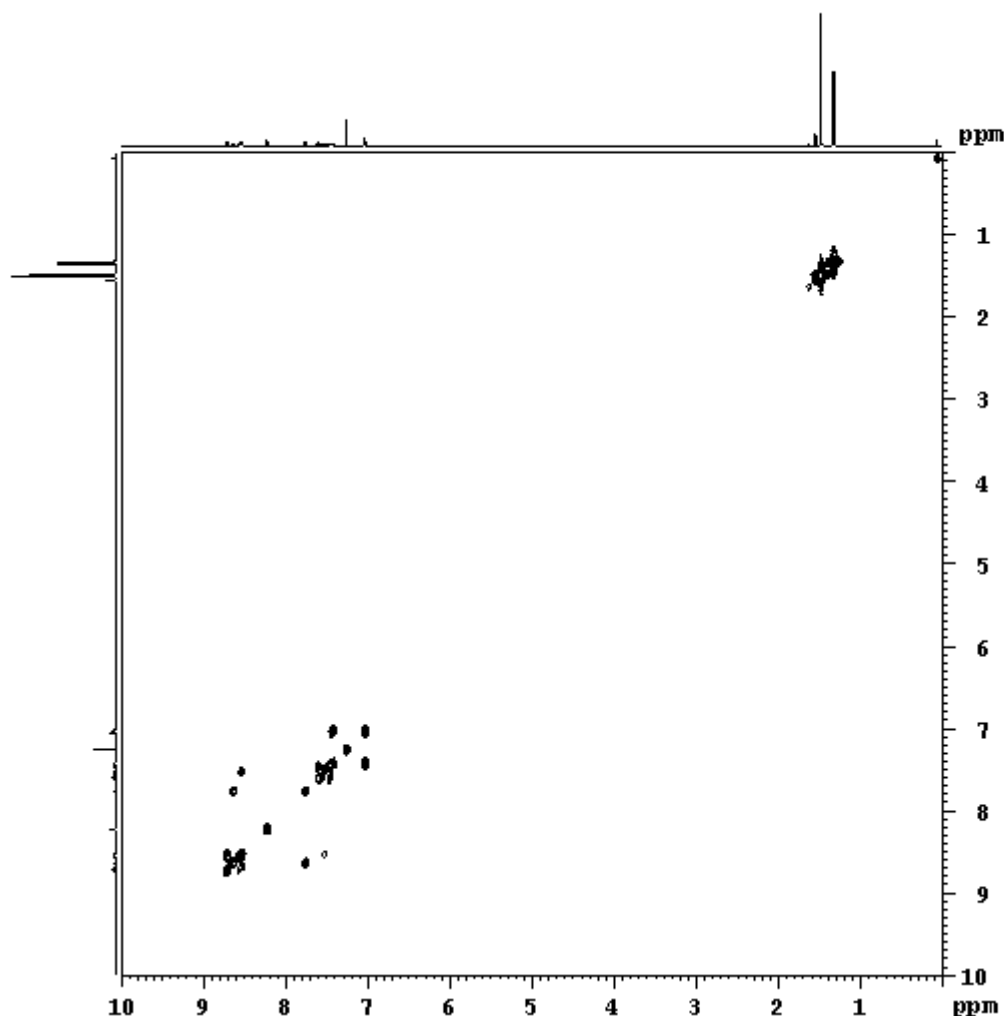

```
Current Data Parameters
NAME          sub=158d
NPTS          2
NPTS2         1
```

```

I2 = Acquisition Parameters
Date: 20211225
Time: 17.31
INSTRUM:
SPCNAME: 5 mm EMT 18-000
SOLARWG:
WD: 1024
SCALEWG: CH13
G2: 16
I2: 16
SPEX: 368.119 Str:
F2 (nm): 5.94368 Str:
AQ: 0.0828700
RG: 645.1
IR: 80.800
DE: 5.00
WE: 297.1 K
c0: 0.00000000
c1: 0.00000000
c2: 0.00000000
c3: 0.00000000
c4: 0.00000000
c5: 0.00000000
c6: 0.00000000
c7: 0.00000000

```

```
===== CHARGES: Fl =====
SPEC1          1m
FO              6.00  =====
FI             10.60  =====
FLI            9.90  dm
SFO1           500.1325652  MW
```

| ITEM   | QUANTITY | PRICE | TOTAL   |
|--------|----------|-------|---------|
| ITEM1  | 100      | 10.00 | 1000.00 |
| ITEM2  | 100      | 10.00 | 1000.00 |
| ITEM3  | 100      | 10.00 | 1000.00 |
| ITEM4  | 100      | 10.00 | 1000.00 |
| ITEM5  | 100      | 10.00 | 1000.00 |
| ITEM6  | 100      | 10.00 | 1000.00 |
| ITEM7  | 100      | 10.00 | 1000.00 |
| ITEM8  | 100      | 10.00 | 1000.00 |
| ITEM9  | 100      | 10.00 | 1000.00 |
| ITEM10 | 100      | 10.00 | 1000.00 |
| ITEM11 | 100      | 10.00 | 1000.00 |
| ITEM12 | 100      | 10.00 | 1000.00 |
| ITEM13 | 100      | 10.00 | 1000.00 |
| ITEM14 | 100      | 10.00 | 1000.00 |
| ITEM15 | 100      | 10.00 | 1000.00 |
| ITEM16 | 100      | 10.00 | 1000.00 |
| ITEM17 | 100      | 10.00 | 1000.00 |
| ITEM18 | 100      | 10.00 | 1000.00 |
| ITEM19 | 100      | 10.00 | 1000.00 |
| ITEM20 | 100      | 10.00 | 1000.00 |
| ITEM21 | 100      | 10.00 | 1000.00 |
| ITEM22 | 100      | 10.00 | 1000.00 |
| ITEM23 | 100      | 10.00 | 1000.00 |
| ITEM24 | 100      | 10.00 | 1000.00 |
| ITEM25 | 100      | 10.00 | 1000.00 |
| ITEM26 | 100      | 10.00 | 1000.00 |
| ITEM27 | 100      | 10.00 | 1000.00 |
| ITEM28 | 100      | 10.00 | 1000.00 |
| ITEM29 | 100      | 10.00 | 1000.00 |
| ITEM30 | 100      | 10.00 | 1000.00 |
| ITEM31 | 100      | 10.00 | 1000.00 |
| ITEM32 | 100      | 10.00 | 1000.00 |
| ITEM33 | 100      | 10.00 | 1000.00 |
| ITEM34 | 100      | 10.00 | 1000.00 |
| ITEM35 | 100      | 10.00 | 1000.00 |
| ITEM36 | 100      | 10.00 | 1000.00 |
| ITEM37 | 100      | 10.00 | 1000.00 |
| ITEM38 | 100      | 10.00 | 1000.00 |
| ITEM39 | 100      | 10.00 | 1000.00 |
| ITEM40 | 100      | 10.00 | 1000.00 |
| ITEM41 | 100      | 10.00 | 1000.00 |
| ITEM42 | 100      | 10.00 | 1000.00 |
| ITEM43 | 100      | 10.00 | 1000.00 |
| ITEM44 | 100      | 10.00 | 1000.00 |
| ITEM45 | 100      | 10.00 | 1000.00 |
| ITEM46 | 100      | 10.00 | 1000.00 |
| ITEM47 | 100      | 10.00 | 1000.00 |
| ITEM48 | 100      | 10.00 | 1000.00 |
| ITEM49 | 100      | 10.00 | 1000.00 |
| ITEM50 | 100      | 10.00 | 1000.00 |
| ITEM51 | 100      | 10.00 | 1000.00 |
| ITEM52 | 100      | 10.00 | 1000.00 |
| ITEM53 | 100      | 10.00 | 1000.00 |
| ITEM54 | 100      | 10.00 | 1000.00 |
| ITEM55 | 100      | 10.00 | 1000.00 |
| ITEM56 | 100      | 10.00 | 1000.00 |
| ITEM57 | 100      | 10.00 | 1000.00 |
| ITEM58 | 100      | 10.00 | 1000.00 |
| ITEM59 | 100      | 10.00 | 1000.00 |
| ITEM60 | 100      | 10.00 | 1000.00 |
| ITEM61 | 100      | 10.00 | 1000.00 |
| ITEM62 | 100      | 10.00 | 1000.00 |
| ITEM63 | 100      | 10.00 | 1000.00 |
| ITEM64 | 100      | 10.00 | 1000.00 |
| ITEM65 | 100      | 10.00 | 1000.00 |
| ITEM66 | 100      | 10.00 | 1000.00 |
| ITEM67 | 100      | 10.00 | 1000.00 |
| ITEM68 | 100      | 10.00 | 1000.00 |
| ITEM69 | 100      | 10.00 | 1000.00 |
| ITEM70 | 100      | 10.00 | 1000.00 |
| ITEM71 | 100      | 10.00 | 1000.00 |
| ITEM72 | 100      | 10.00 | 1000.00 |
| ITEM73 | 100      | 10.00 | 1000.00 |
| ITEM74 | 100      | 10.00 | 1000.00 |
| ITEM75 | 100      | 10.00 | 1000.00 |
| ITEM76 | 100      | 10.00 | 1000.00 |
| ITEM77 | 100      | 10.00 | 1000.00 |
| ITEM78 | 100      | 10.00 | 1000.00 |
| ITEM79 | 100      | 10.00 | 1000.00 |
| ITEM80 | 100      | 10.00 | 1000.00 |
| ITEM81 | 100      | 10.00 | 1000.00 |
| ITEM82 | 100      | 10.00 | 1000.00 |
| ITEM83 | 100      | 10.00 | 1       |

```

F1 = Acquisition parameters
END      1
F2      128
SFO1     500.1326 MHz
FIDRES    48.544677 Hz
SR       12.573 ppm
FWDOM     0

```

```

F2 = Processing parameters
SI          1024
SY          500.13000000 Hz
S100        5.1200
S200         0
L0          0.00 Hz
L2          0
YC          0.60

```

```

R1 = Processing parameters
SI          1.024
MC2         GF
SF          500..1000000 MHz
SI         512KB
S2         0
Z0         0.00 Ohm
P0         0

```

# Aromatic region

asb-158d in CDCl<sub>3</sub>

COSY6PQF

TD=1024-128, NS=16

23-11-2012

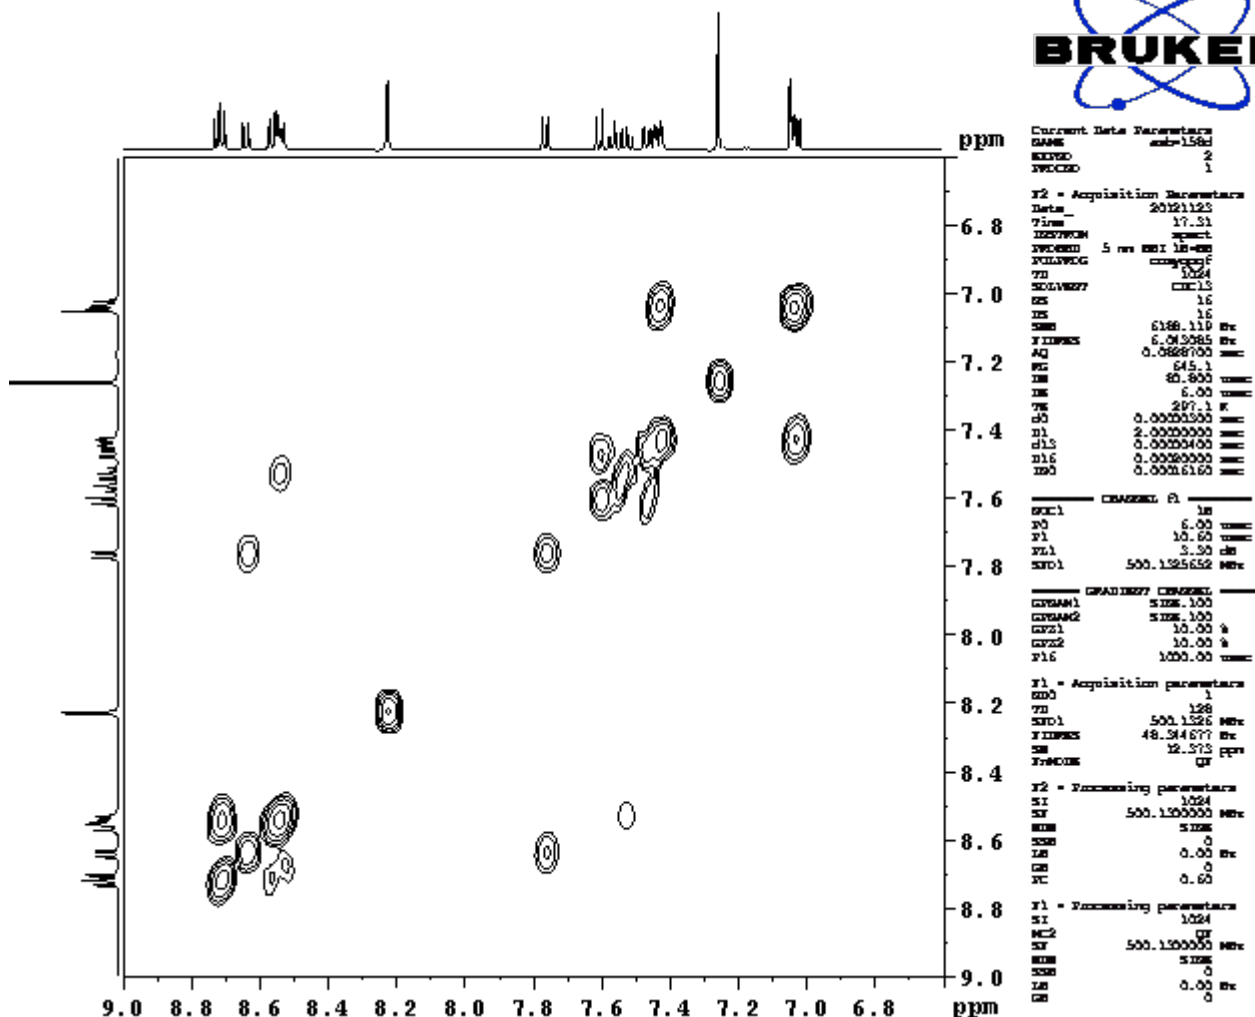

## asb-158d in CDC13 13C CORR 22-11-2012

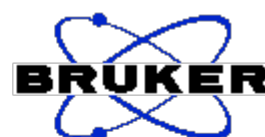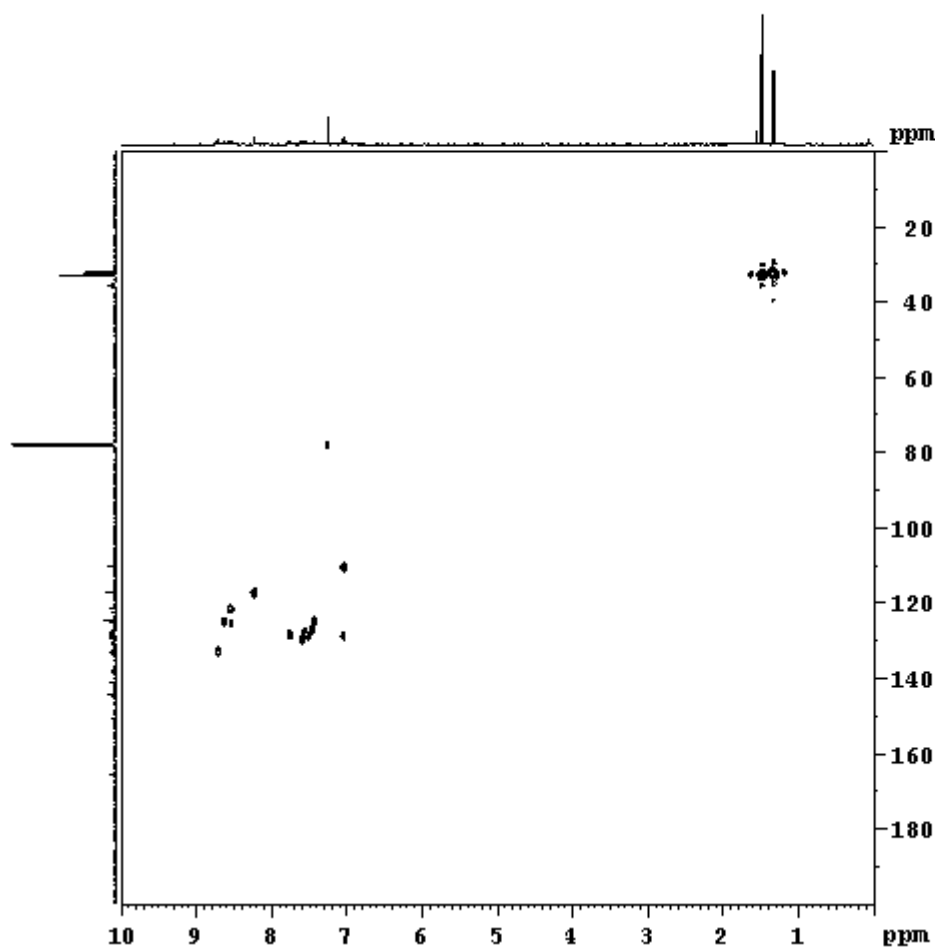[illegible]

## asb-158d in CDC13 13C COBB 23-11-2012

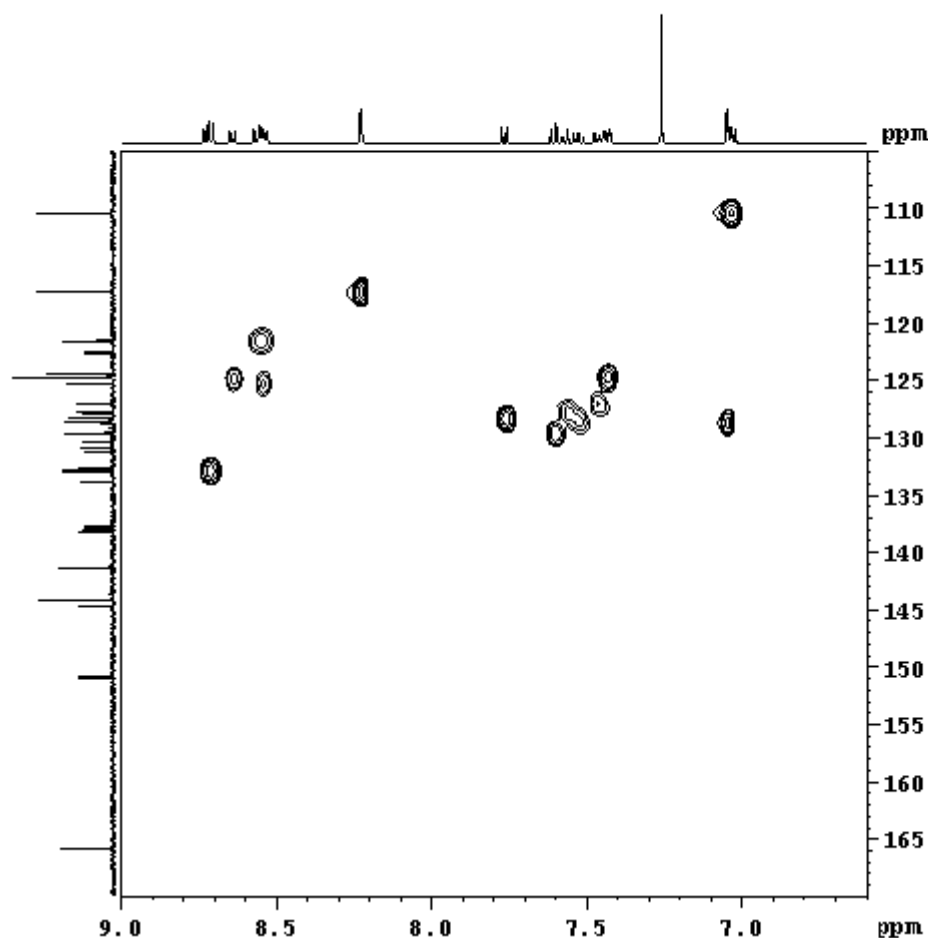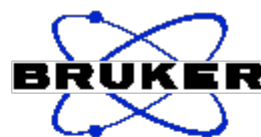

|           |      |              |
|-----------|------|--------------|
| COPY DATE | DATE | PAGE NUMBER  |
| DATE      |      | NO. OF PAGES |
| COPY NO.  |      | 4            |
| PAGE NO.  |      | 3            |

[illegible]

| COMPANEL 11 |             |       |
|-------------|-------------|-------|
| REC 1       | 1.8         |       |
| FL          | 10.60       | 10000 |
| LC          | 21.20       | 10000 |
| PLD         | 0.00        | 10000 |
| PL1         | 3.20        | 00    |
| WTU 1       | 600.1333333 | 10000 |

| CROSSING         |  | F <sub>2</sub> |       |
|------------------|--|----------------|-------|
| 3RD event        |  | 4607           |       |
| BC1 ±            |  | 1.5C           |       |
| F <sub>2</sub>   |  | 1.9.00         | unobd |
| 3d               |  | 2.6.00         | unobd |
| PCW1 ±           |  | 80.00          | unobd |
| F <sub>2</sub> ± |  | -0.80          | CM    |
| F <sub>2</sub> ± |  | 2.4.00         | CM    |
| BC1 ±            |  | 1.5b, TT000.8  | MM    |

| SUFFICIENT COMPENSATION |         |
|-------------------------|---------|
| SPX P+CL                | 21.00   |
| SPX P+CL                | 21.00   |
| SPX 1                   | 20.00   |
| SPX 2                   | 20.00   |
| PLA                     | 1000.00 |

```
FL - Acquisition parameters
END          +
FO           the
INFO1        1 file, 770k, 18m
FILE NAME    116, 3741k, 18m
IN           1st, 1994
PAGE COUNT   1000-1000, 1000
```

[illegible]

```

F2 - W/COOLING p0000000000000000
KZ      1.000
CUT      0.000-0.000000
WF      1.000 TAYLOR HILL
KCN      0.000
KCM      0.000
LB      0.000

```

# $^1\text{H}$ $^{13}\text{C}$ HETCOR long range coupling - full spectral range

asb-158d in CDCl<sub>3</sub> 1H-13C CORR LONG RANGE D6 corretto!! 23-11-2012

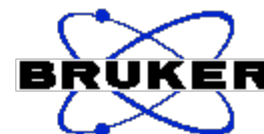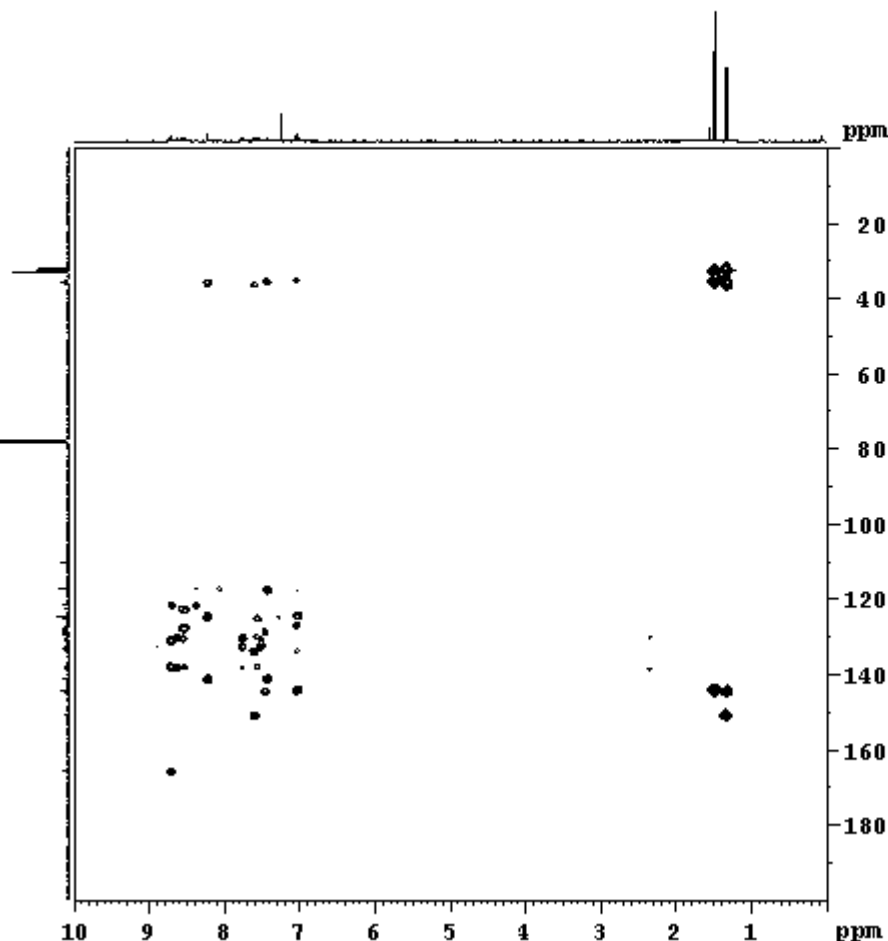

Current Data Parameters  
NAME asb-158d  
EXPNO 3  
PROCNO 1

F2 - Acquisition Parameters  
Date\_ 20121124  
Time 1.43  
INSTRUM spect  
PROBHD 5 mm BBO 1H-13C  
PULPROG zgpg30  
TD 65536  
SOLVENT CDCl<sub>3</sub>  
AQ 46  
RG 320  
DS 4  
SWH 4166.112 Hz  
FIDRES 0.000000 Hz  
AQ 0.000000 sec  
RG 271.25  
CF 80.000 usec  
CL 4.00 usec  
CR 207.1  
CPCP2 145.000000  
CPCP13 8.000000  
AS 0.000000 sec  
CL 4.000000 sec  
CS 0.000000 sec  
CR 0.000000 sec  
CL 4.000000 sec  
CR 0.000000 sec  
CL 4.000000 sec  
CR 0.000000 sec

===== CHANNEL f1 =====  
NUC1 13C  
P1 10.00 usec  
PL 0  
PL2 21.20 usec  
PL3 3.30 dB  
SFO1 200.1324600 MHz

===== CHANNEL f2 =====  
NUC2 1H  
P2 13.00 usec  
PL2 -0.60 dB  
SFO2 500.1360490 MHz

===== CHANNEL f3 =====  
CPDPRG2 GPCPGMT  
CPDPRG1 3 DFT.1.00  
CPDPRG2 3 DFT.1.00  
CPDPRG3 3 DFT.1.00  
CPDPRG4 3 DFT.1.00  
CPDPRG5 3 DFT.1.00  
CPDPRG6 3 DFT.1.00  
CPDPRG7 3 DFT.1.00  
CPDPRG8 3 DFT.1.00  
CPDPRG9 3 DFT.1.00  
CPDPRG10 3 DFT.1.00  
CPDPRG11 3 DFT.1.00  
CPDPRG12 3 DFT.1.00  
CPDPRG13 3 DFT.1.00  
CPDPRG14 3 DFT.1.00  
CPDPRG15 3 DFT.1.00  
CPDPRG16 3 DFT.1.00  
CPDPRG17 3 DFT.1.00  
CPDPRG18 3 DFT.1.00  
CPDPRG19 3 DFT.1.00  
CPDPRG20 3 DFT.1.00  
CPDPRG21 3 DFT.1.00  
CPDPRG22 3 DFT.1.00  
CPDPRG23 3 DFT.1.00  
CPDPRG24 3 DFT.1.00  
CPDPRG25 3 DFT.1.00  
CPDPRG26 3 DFT.1.00  
CPDPRG27 3 DFT.1.00  
CPDPRG28 3 DFT.1.00  
CPDPRG29 3 DFT.1.00  
CPDPRG30 3 DFT.1.00  
CPDPRG31 3 DFT.1.00  
CPDPRG32 3 DFT.1.00  
CPDPRG33 3 DFT.1.00  
CPDPRG34 3 DFT.1.00  
CPDPRG35 3 DFT.1.00  
CPDPRG36 3 DFT.1.00  
CPDPRG37 3 DFT.1.00  
CPDPRG38 3 DFT.1.00  
CPDPRG39 3 DFT.1.00  
CPDPRG40 3 DFT.1.00  
CPDPRG41 3 DFT.1.00  
CPDPRG42 3 DFT.1.00  
CPDPRG43 3 DFT.1.00  
CPDPRG44 3 DFT.1.00  
CPDPRG45 3 DFT.1.00  
CPDPRG46 3 DFT.1.00  
CPDPRG47 3 DFT.1.00  
CPDPRG48 3 DFT.1.00  
CPDPRG49 3 DFT.1.00  
CPDPRG50 3 DFT.1.00  
CPDPRG51 3 DFT.1.00  
CPDPRG52 3 DFT.1.00  
CPDPRG53 3 DFT.1.00  
CPDPRG54 3 DFT.1.00  
CPDPRG55 3 DFT.1.00  
CPDPRG56 3 DFT.1.00  
CPDPRG57 3 DFT.1.00  
CPDPRG58 3 DFT.1.00  
CPDPRG59 3 DFT.1.00  
CPDPRG60 3 DFT.1.00  
CPDPRG61 3 DFT.1.00  
CPDPRG62 3 DFT.1.00  
CPDPRG63 3 DFT.1.00  
CPDPRG64 3 DFT.1.00  
CPDPRG65 3 DFT.1.00  
CPDPRG66 3 DFT.1.00  
CPDPRG67 3 DFT.1.00  
CPDPRG68 3 DFT.1.00  
CPDPRG69 3 DFT.1.00  
CPDPRG70 3 DFT.1.00  
CPDPRG71 3 DFT.1.00  
CPDPRG72 3 DFT.1.00  
CPDPRG73 3 DFT.1.00  
CPDPRG74 3 DFT.1.00  
CPDPRG75 3 DFT.1.00  
CPDPRG76 3 DFT.1.00  
CPDPRG77 3 DFT.1.00  
CPDPRG78 3 DFT.1.00  
CPDPRG79 3 DFT.1.00  
CPDPRG80 3 DFT.1.00  
CPDPRG81 3 DFT.1.00  
CPDPRG82 3 DFT.1.00  
CPDPRG83 3 DFT.1.00  
CPDPRG84 3 DFT.1.00  
CPDPRG85 3 DFT.1.00  
CPDPRG86 3 DFT.1.00  
CPDPRG87 3 DFT.1.00  
CPDPRG88 3 DFT.1.00  
CPDPRG89 3 DFT.1.00  
CPDPRG90 3 DFT.1.00  
CPDPRG91 3 DFT.1.00  
CPDPRG92 3 DFT.1.00  
CPDPRG93 3 DFT.1.00  
CPDPRG94 3 DFT.1.00  
CPDPRG95 3 DFT.1.00  
CPDPRG96 3 DFT.1.00  
CPDPRG97 3 DFT.1.00  
CPDPRG98 3 DFT.1.00  
CPDPRG99 3 DFT.1.00  
CPDPRG100 3 DFT.1.00

F1 - Acquisition parameters  
NUC1 13C  
TD 65536  
SFO1 200.1324600 MHz  
PULPROG zgpg30  
PL 0  
PL2 21.20 usec  
PL3 3.30 dB  
SFO2 500.1360490 MHz

F2 - Processing parameters  
SI 32768  
SF 200.1324600 MHz  
WDW EM  
SSB 0  
GB 0  
PC 0  
SC 1.40

F1 - Processing parameters  
SI 32768  
SF 200.1324600 MHz  
WDW EM  
SSB 0  
GB 0  
PC 0  
SC 1.40



asb-158d in CDC13 1H-13C CORB LONG RANGE D6 corrected!! 23-11-2012

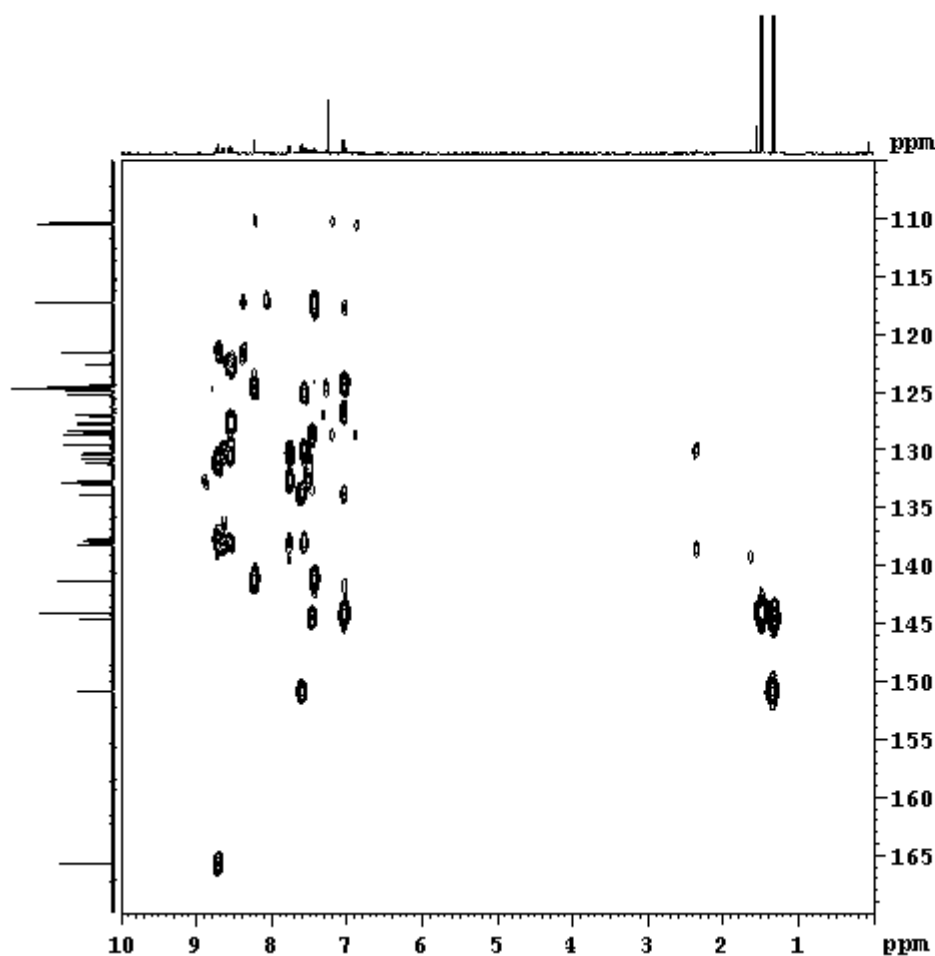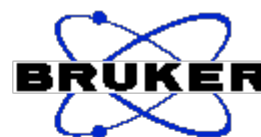[illegible]

### 2.4. Derivative 3.

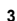<sup>1</sup>H full range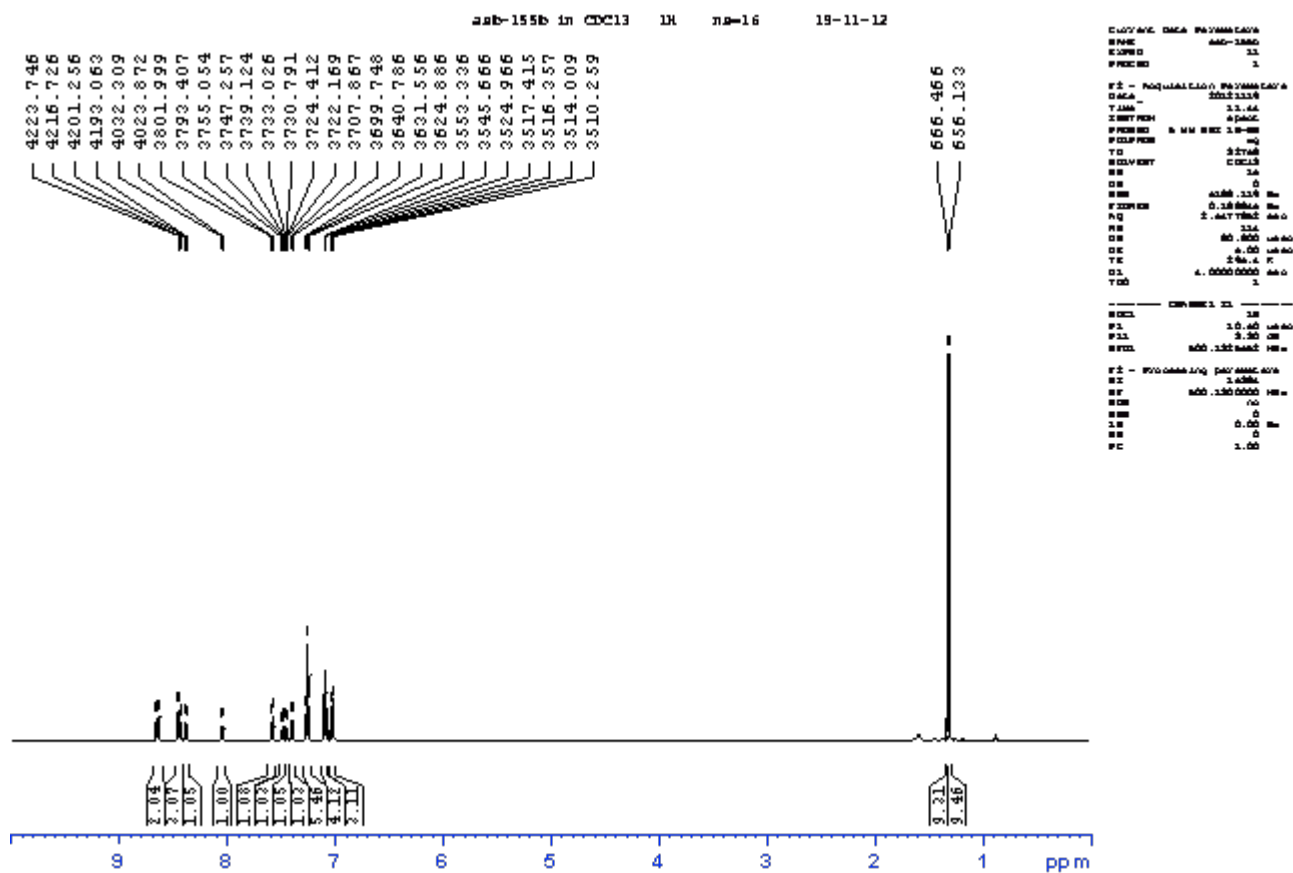

<sup>1</sup>H NMR spectrum (400 MHz, CDCl<sub>3</sub>) of compound 155b. The spectrum shows peaks in the aromatic region (6.8-7.7 ppm) and aliphatic region (1.0-2.6 ppm). Integration values are provided below the peaks.

| Chemical Shift (ppm)                                                                                                                                                                                                                                                                                                                                                                                                                                                                                                                                                                                                                                                                                                                                                                                                                                                                                                                                                                                                                                                                                                                                                                                                                                                                                                                                                                                                                           | Integration                                                                                                                                                                                                                                                                                                                                                                                                                                                                                                                                                                                                                                                                                                                                                                                                                                                                                                                                                                                                                                                                                                                                                                                                                                                                                                                                                                                                                                    |
|------------------------------------------------------------------------------------------------------------------------------------------------------------------------------------------------------------------------------------------------------------------------------------------------------------------------------------------------------------------------------------------------------------------------------------------------------------------------------------------------------------------------------------------------------------------------------------------------------------------------------------------------------------------------------------------------------------------------------------------------------------------------------------------------------------------------------------------------------------------------------------------------------------------------------------------------------------------------------------------------------------------------------------------------------------------------------------------------------------------------------------------------------------------------------------------------------------------------------------------------------------------------------------------------------------------------------------------------------------------------------------------------------------------------------------------------|------------------------------------------------------------------------------------------------------------------------------------------------------------------------------------------------------------------------------------------------------------------------------------------------------------------------------------------------------------------------------------------------------------------------------------------------------------------------------------------------------------------------------------------------------------------------------------------------------------------------------------------------------------------------------------------------------------------------------------------------------------------------------------------------------------------------------------------------------------------------------------------------------------------------------------------------------------------------------------------------------------------------------------------------------------------------------------------------------------------------------------------------------------------------------------------------------------------------------------------------------------------------------------------------------------------------------------------------------------------------------------------------------------------------------------------------|
| 7.65, 7.62, 7.58, 7.55, 7.52, 7.48, 7.45, 7.42, 7.38, 7.35, 7.32, 7.28, 7.25, 7.22, 7.18, 7.15, 7.12, 7.08, 7.05, 7.02, 6.98, 6.95, 6.92, 6.88, 6.85, 6.82, 6.78, 6.75, 6.72, 6.68, 6.65, 6.62, 6.58, 6.55, 6.52, 6.48, 6.45, 6.42, 6.38, 6.35, 6.32, 6.28, 6.25, 6.22, 6.18, 6.15, 6.12, 6.08, 6.05, 6.02, 5.98, 5.95, 5.92, 5.88, 5.85, 5.82, 5.78, 5.75, 5.72, 5.68, 5.65, 5.62, 5.58, 5.55, 5.52, 5.48, 5.45, 5.42, 5.38, 5.35, 5.32, 5.28, 5.25, 5.22, 5.18, 5.15, 5.12, 5.08, 5.05, 5.02, 4.98, 4.95, 4.92, 4.88, 4.85, 4.82, 4.78, 4.75, 4.72, 4.68, 4.65, 4.62, 4.58, 4.55, 4.52, 4.48, 4.45, 4.42, 4.38, 4.35, 4.32, 4.28, 4.25, 4.22, 4.18, 4.15, 4.12, 4.08, 4.05, 4.02, 3.98, 3.95, 3.92, 3.88, 3.85, 3.82, 3.78, 3.75, 3.72, 3.68, 3.65, 3.62, 3.58, 3.55, 3.52, 3.48, 3.45, 3.42, 3.38, 3.35, 3.32, 3.28, 3.25, 3.22, 3.18, 3.15, 3.12, 3.08, 3.05, 3.02, 2.98, 2.95, 2.92, 2.88, 2.85, 2.82, 2.78, 2.75, 2.72, 2.68, 2.65, 2.62, 2.58, 2.55, 2.52, 2.48, 2.45, 2.42, 2.38, 2.35, 2.32, 2.28, 2.25, 2.22, 2.18, 2.15, 2.12, 2.08, 2.05, 2.02, 1.98, 1.95, 1.92, 1.88, 1.85, 1.82, 1.78, 1.75, 1.72, 1.68, 1.65, 1.62, 1.58, 1.55, 1.52, 1.48, 1.45, 1.42, 1.38, 1.35, 1.32, 1.28, 1.25, 1.22, 1.18, 1.15, 1.12, 1.08, 1.05, 1.02, 1.00, 0.98, 0.95, 0.92, 0.88, 0.85, 0.82, 0.78, 0.75, 0.72, 0.68, 0.65, 0.62, 0.58, 0.55, 0.52, 0.48, 0.45, 0.42, 0.38, 0.35, 0.32, 0.28, 0.25, 0.22, 0.18, 0.15, 0.12, 0.08, 0.05, 0.02, 0.00 | 7.65, 7.62, 7.58, 7.55, 7.52, 7.48, 7.45, 7.42, 7.38, 7.35, 7.32, 7.28, 7.25, 7.22, 7.18, 7.15, 7.12, 7.08, 7.05, 7.02, 6.98, 6.95, 6.92, 6.88, 6.85, 6.82, 6.78, 6.75, 6.72, 6.68, 6.65, 6.62, 6.58, 6.55, 6.52, 6.48, 6.45, 6.42, 6.38, 6.35, 6.32, 6.28, 6.25, 6.22, 6.18, 6.15, 6.12, 6.08, 6.05, 6.02, 5.98, 5.95, 5.92, 5.88, 5.85, 5.82, 5.78, 5.75, 5.72, 5.68, 5.65, 5.62, 5.58, 5.55, 5.52, 5.48, 5.45, 5.42, 5.38, 5.35, 5.32, 5.28, 5.25, 5.22, 5.18, 5.15, 5.12, 5.08, 5.05, 5.02, 4.98, 4.95, 4.92, 4.88, 4.85, 4.82, 4.78, 4.75, 4.72, 4.68, 4.65, 4.62, 4.58, 4.55, 4.52, 4.48, 4.45, 4.42, 4.38, 4.35, 4.32, 4.28, 4.25, 4.22, 4.18, 4.15, 4.12, 4.08, 4.05, 4.02, 3.98, 3.95, 3.92, 3.88, 3.85, 3.82, 3.78, 3.75, 3.72, 3.68, 3.65, 3.62, 3.58, 3.55, 3.52, 3.48, 3.45, 3.42, 3.38, 3.35, 3.32, 3.28, 3.25, 3.22, 3.18, 3.15, 3.12, 3.08, 3.05, 3.02, 2.98, 2.95, 2.92, 2.88, 2.85, 2.82, 2.78, 2.75, 2.72, 2.68, 2.65, 2.62, 2.58, 2.55, 2.52, 2.48, 2.45, 2.42, 2.38, 2.35, 2.32, 2.28, 2.25, 2.22, 2.18, 2.15, 2.12, 2.08, 2.05, 2.02, 1.98, 1.95, 1.92, 1.88, 1.85, 1.82, 1.78, 1.75, 1.72, 1.68, 1.65, 1.62, 1.58, 1.55, 1.52, 1.48, 1.45, 1.42, 1.38, 1.35, 1.32, 1.28, 1.25, 1.22, 1.18, 1.15, 1.12, 1.08, 1.05, 1.02, 1.00, 0.98, 0.95, 0.92, 0.88, 0.85, 0.82, 0.78, 0.75, 0.72, 0.68, 0.65, 0.62, 0.58, 0.55, 0.52, 0.48, 0.45, 0.42, 0.38, 0.35, 0.32, 0.28, 0.25, 0.22, 0.18, 0.15, 0.12, 0.08, 0.05, 0.02, 0.00 |
| 7.65, 7.62, 7.58, 7.55, 7.52, 7.48, 7.45, 7.42, 7.38, 7.35, 7.32, 7.28, 7.25, 7.22, 7.18, 7.15, 7.12, 7.08, 7.05, 7.02, 6.98, 6.95, 6.92, 6.88, 6.85, 6.82, 6.78, 6.75, 6.72, 6.68, 6.65, 6.62, 6.58, 6.55, 6.52, 6.48, 6.45, 6.42, 6.38, 6.35, 6.32, 6.28, 6.25, 6.22, 6.18, 6.15, 6.12, 6.08, 6.05, 6.02, 5.98, 5.95, 5.92, 5.88, 5.85, 5.82, 5.78, 5.75, 5.72, 5.68, 5.65, 5.62, 5.58, 5.55, 5.52, 5.48, 5.45, 5.42, 5.38, 5.35, 5.32, 5.28, 5.25, 5.22, 5.18, 5.15, 5.12, 5.08, 5.05, 5.02, 4.98, 4.95, 4.92, 4.88, 4.85, 4.82, 4.78, 4.75, 4.72, 4.68, 4.65, 4.62, 4.58, 4.55, 4.52, 4.48, 4.45, 4.42, 4.38, 4.35, 4.32, 4.28, 4.25, 4.22, 4.18, 4.15, 4.12, 4.08, 4.05, 4.02, 3.98, 3.95, 3.92, 3.88, 3.85, 3.82, 3.78, 3.75, 3.72, 3.68, 3.65, 3.62, 3.58, 3.55, 3.52, 3.48, 3.45, 3.42, 3.38, 3.35, 3.32, 3.28, 3.25, 3.22, 3.18, 3.15, 3.12, 3.08, 3.05, 3.02, 2.98, 2.95, 2.92, 2.88, 2.85, 2.82, 2.78, 2.75, 2.72, 2.68, 2.65, 2.62, 2.58, 2.55, 2.52, 2.48, 2.45, 2.42, 2.38, 2.35, 2.32, 2.28, 2.25, 2.22, 2.18, 2.15, 2.12, 2.08, 2.05, 2.02, 1.98, 1.95, 1.92, 1.88, 1.85, 1.82, 1.78, 1.75, 1.72, 1.68, 1.65, 1.62, 1.58, 1.55, 1.52, 1.48, 1.45, 1.42, 1.38, 1.35, 1.32, 1.28, 1.25, 1.22, 1.18, 1.15, 1.12, 1.08, 1.05, 1.02, 1.00, 0.98, 0.95, 0.92, 0.88, 0.85, 0.82, 0.78, 0.75, 0.72, 0.68, 0.65, 0.62, 0.58, 0.55, 0.52, 0.48, 0.45, 0.42, 0.38, 0.35, 0.32, 0.28, 0.25, 0.22, 0.18, 0.15, 0.12, 0.08, 0.05, 0.02, 0.00 |                                                                                                                                                                                                                                                                                                                                                                                                                                                                                                                                                                                                                                                                                                                                                                                                                                                                                                                                                                                                                                                                                                                                                                                                                                                                                                                                                                                                                                                |

[illegible]

<sup>13</sup>C Full spectral range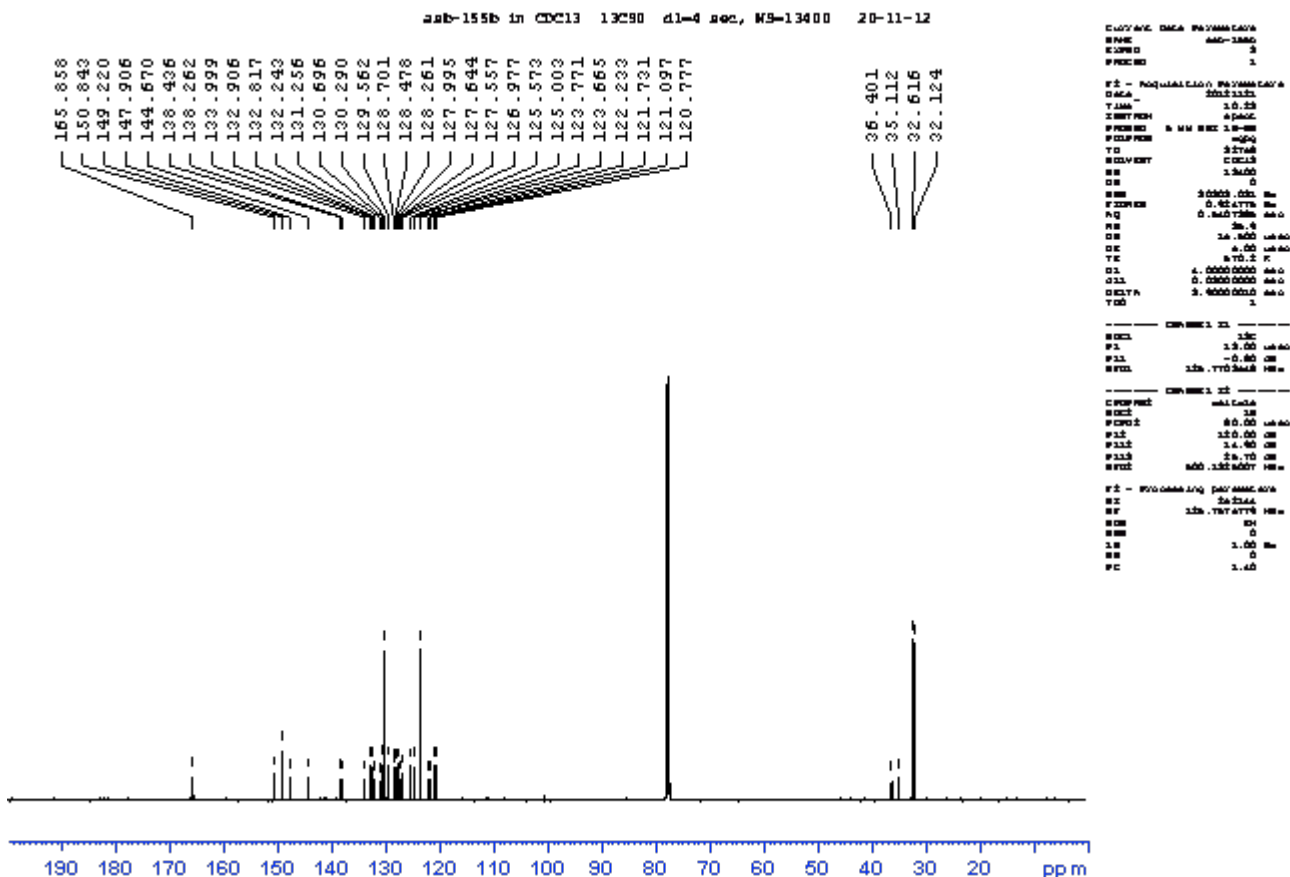

Aromatic region

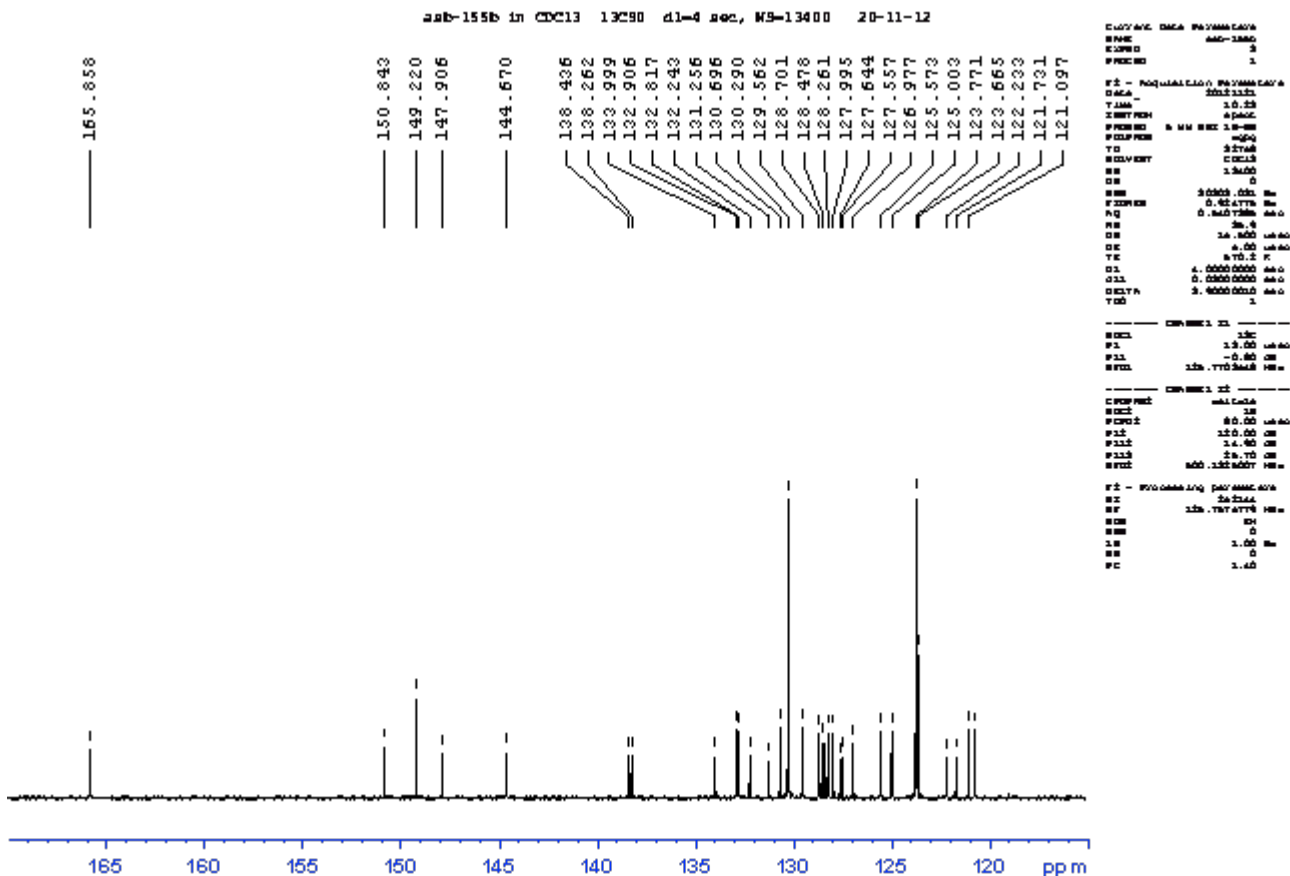

sub-155b in CDCl<sub>3</sub> 13C90 d1=4 sec, W9-13400 20-11-12

36.401  
35.112  
32.616  
32.124

110 100 90 80 70 60 50 40 30 20 10 ppm

[illegible]

# <sup>1</sup>H COSY full spectral range

asb-155b in CDCl<sub>3</sub>

COSY6PQF

TD=1024-128, NS=16

21-11-2012

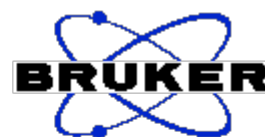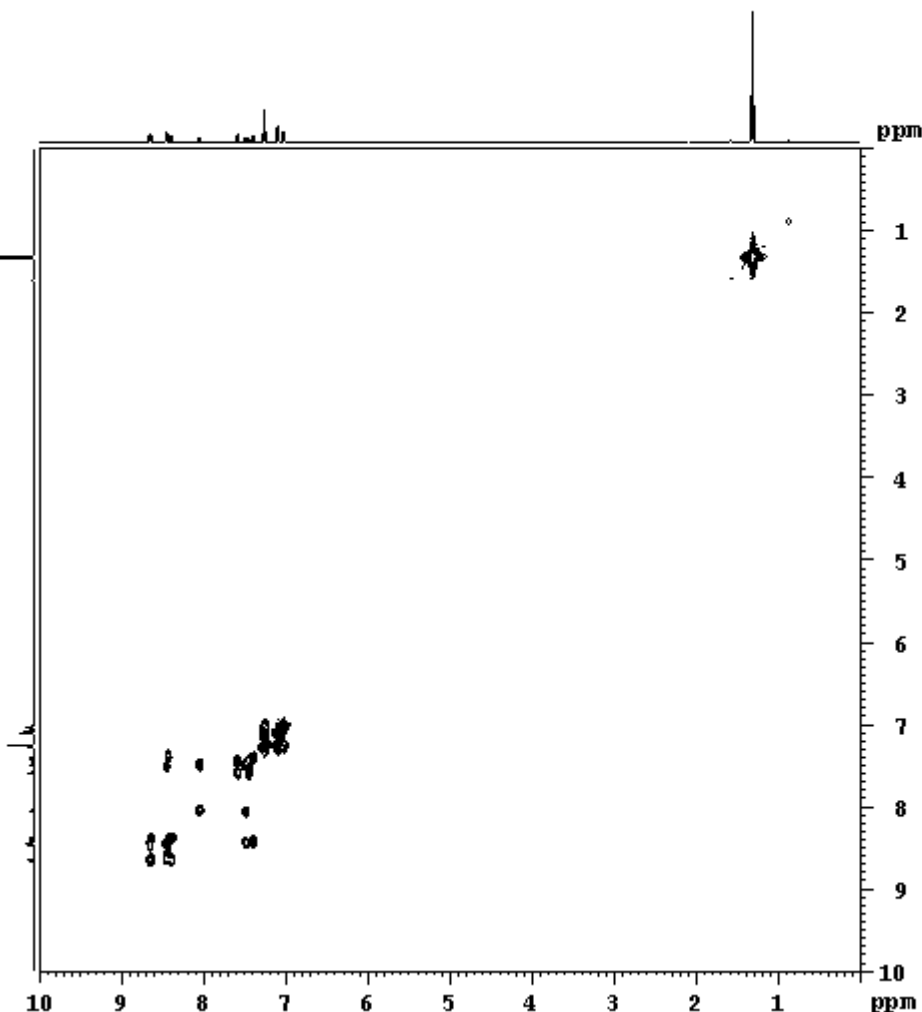

Current Data Parameters  
NAME asb-155b  
KEYED 2  
SWH00 1

F2 - Acquisition Parameters  
Date\_ 20121121  
Time 15.00  
INSTRUM spect  
PROBHD 5 mm BBI 1H-400  
PULPROG zgpg30  
TD 1024  
SOLVENT CDCl<sub>3</sub>  
NS 16  
DS 16  
SWH 6188.110 Hz  
FIDRES 6.045085 Hz  
AQ 0.0228700 sec  
RG 406.4  
IN 80.800 MHz  
DE 6.00 MHz  
TE 296.0 K  
d0 0.0000000 sec  
d1 2.0000000 sec  
d15 0.0000000 sec  
d16 0.0000000 sec  
d20 0.0001610 sec

===== CHANNEL F1 =====  
NUC1 1H  
P0 6.00 MHz  
P1 10.00 MHz  
PL1 3.30 dB  
SFO1 500.1325652 MHz

===== CHANNEL F2 =====  
NUC2 13C  
P0 10.00 MHz  
P1 10.00 MHz  
PL1 0.00 dB  
SFO2 100.628150 MHz

F1 - Acquisition parameters  
SFO 128  
SFO1 500.13256 MHz  
FIDRES 48.344677 Hz  
SR 12.573 ppm  
SWH00 0

F2 - Processing parameters  
SI 1024  
SF 500.1300000 MHz  
WDW 0  
SSB 0  
LB 0.00 Hz  
GB 0  
MC 0.60

F1 - Processing parameters  
SI 1024  
SF 500.1300000 MHz  
WDW 0  
SSB 0  
LB 0.00 Hz  
GB 0

aromatic region

asb-155b in CDCl<sub>3</sub>

COSY6PQF

TD=1024-128, NS=16

21-11-2012

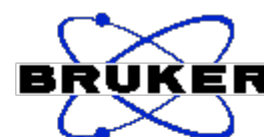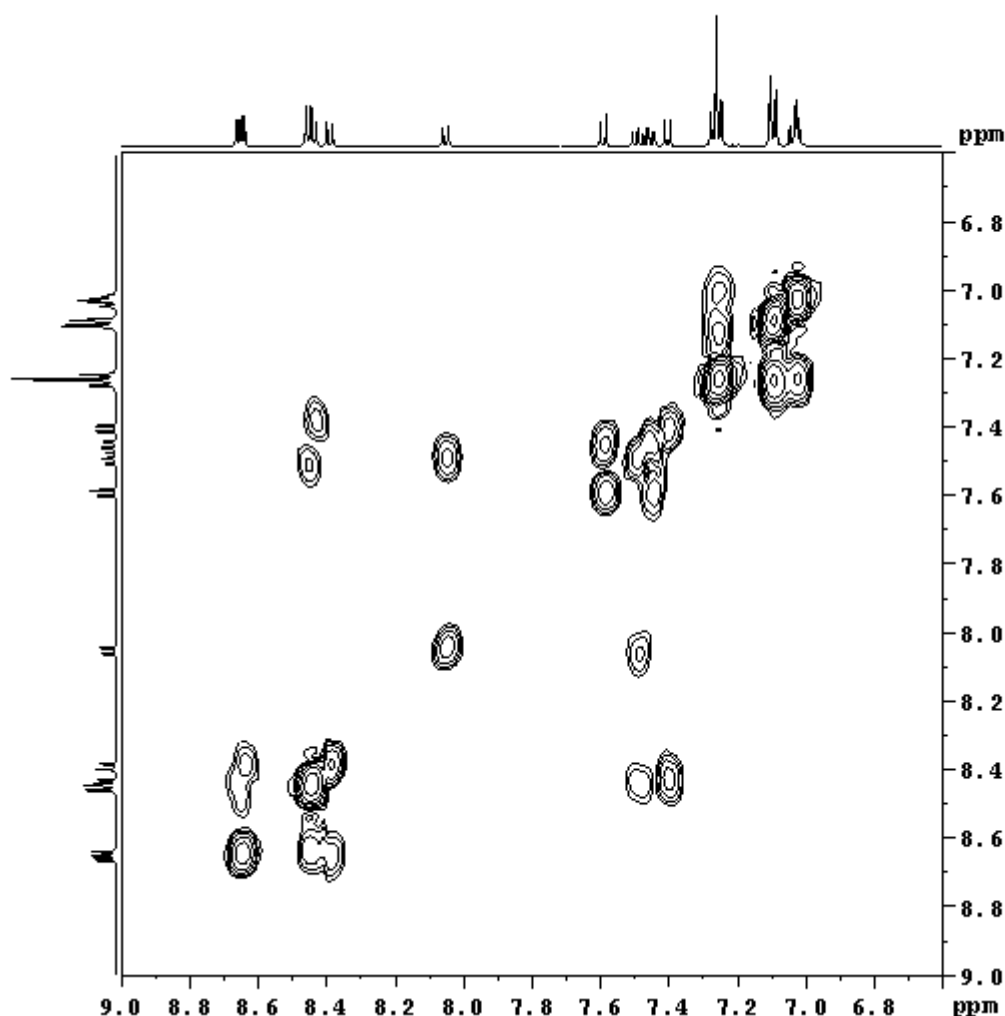

Current Data Parameters  
 NAME asb-155b  
 KEYED 2  
 SWHCD 1

F2 - Acquisition Parameters  
 Date\_ 20121121  
 Time 15.00  
 INSTRUM spect  
 PROCNO 5 run 001 1b-000  
 F2F1WVG cosygpgp  
 F2 1024  
 SOLVENT CDCl<sub>3</sub>  
 NS 16  
 DS 16  
 SFO 638.119 MHz  
 FIDRES 6.045085 Hz  
 AQ 0.0228700 sec  
 RG 406.4  
 IN 80.000 sec  
 DE 6.00 sec  
 TE 296.0 K  
 d0 0.0000000 sec  
 d1 2.0000000 sec  
 d15 0.0000000 sec  
 d16 0.0000000 sec  
 d20 0.00016160 sec

CHARGE: F1  
 GC1 1a  
 P0 6.00 sec  
 P1 10.00 sec  
 PL1 3.30 dB  
 SFO1 500.1325652 MHz

GRABBER GRABBER  
 GRAB0 500.100  
 GRAB2 500.100  
 GRV1 10.00 s  
 GRV2 10.00 s  
 P16 1000.00 sec

F1 - Acquisition parameters  
 FID 128  
 F2 1024  
 SFO1 500.1326 MHz  
 FIDRES 48.344677 Hz  
 IN 12.575 ppm  
 FIDRES 0

F2 - Processing parameters  
 SI 1024  
 SF 500.1300000 MHz  
 RG 0  
 SFO 0  
 LB 0.00 Hz  
 GB 0  
 XC 0.60

F1 - Processing parameters  
 SI 1024  
 SF 500.1300000 MHz  
 RG 0  
 SFO 0  
 LB 0.00 Hz  
 GB 0

## asb-155b in CDC13 13C COBB 21-11-2012

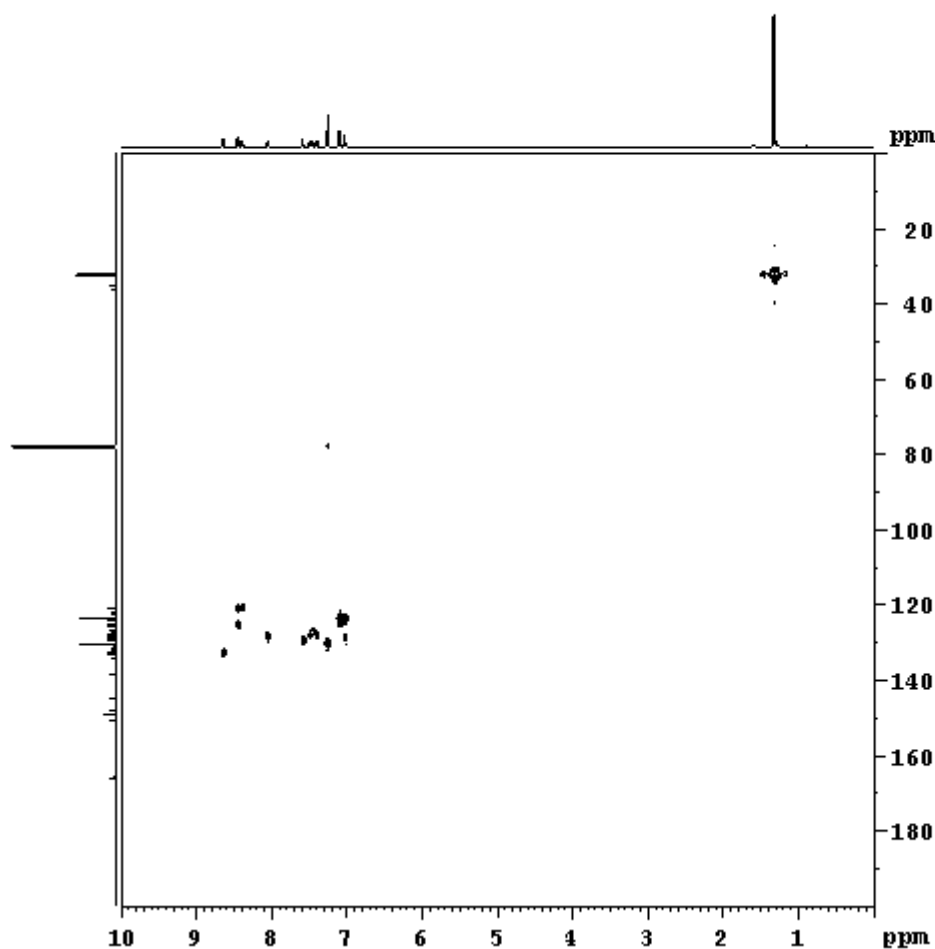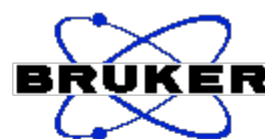[illegible]



## asb-155b in CDC13 13C CORR 21-11-2012

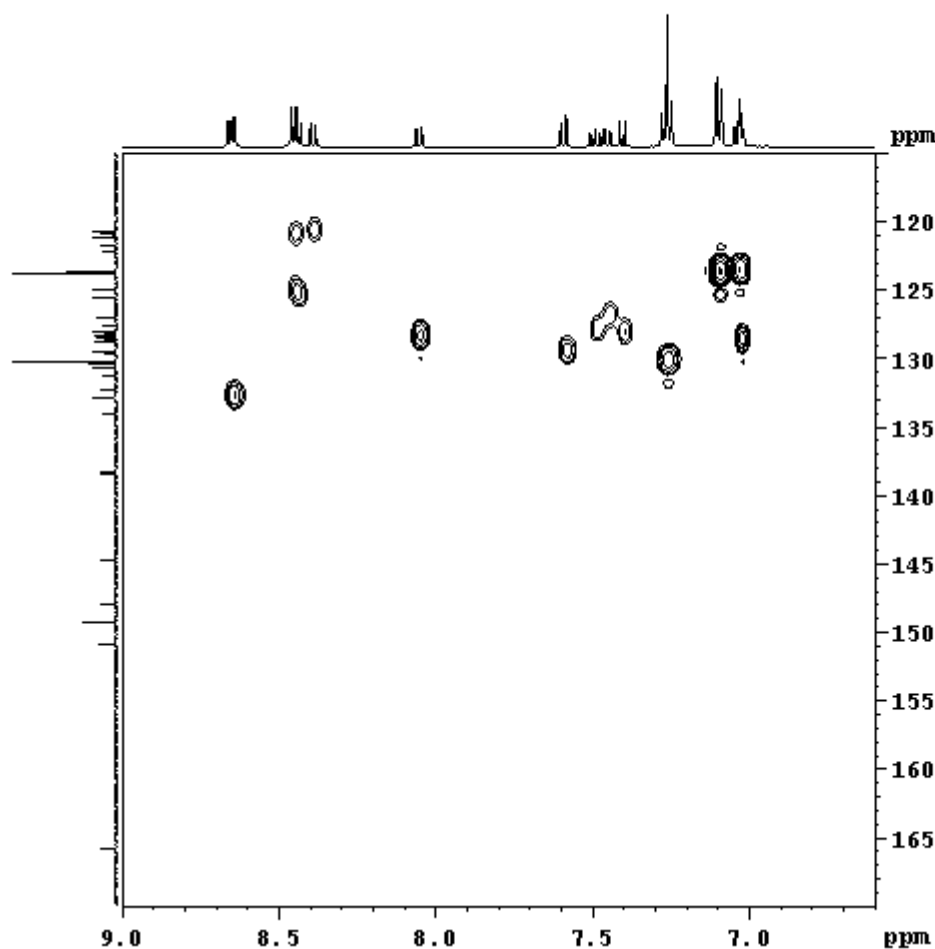[illegible]

<sup>1</sup>H <sup>13</sup>C HETCOR long range coupling - full spectral range

asb-155b in CDC13 LH-13C CORR LONG RANGE D6 corretto!! 21-11-2012

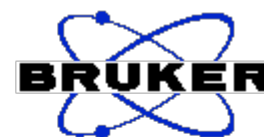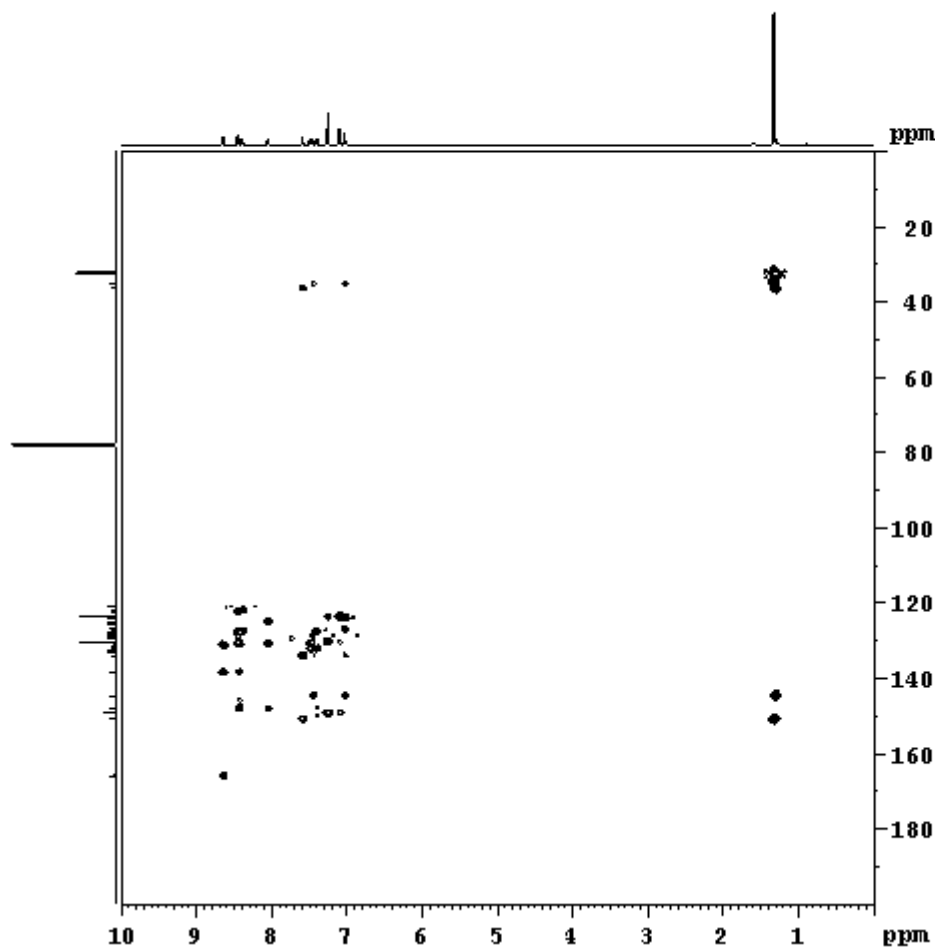

```

Current Data Parameters
NAME          val=123.0
RANGE        1
SUBNAME      1

-- Acquisition Parameters
Date         20171124
Time         17.38
DETECTOR     acsc
PULPROG      5 sec flat 16-88
NOFREQ       hrfreqprod1
PC           10
SOLNAME      C0013
CO           32
CQ           1
SFR          4148.114 Hz
PCORR        0.430389 Hz
RG           0.0826703 sec
CPR          0.000000
CPC          0.000000
CPS          145.000000 Hz
CPCPR13      8.0000000
CPCPR14      8.0000000
CPCPR15      8.0000000
CPCPR16      8.0000000
CPCPR17      8.0000000
CPCPR18      8.0000000
CPCPR19      8.0000000
CPCPR20      8.0000000
CPCPR21      8.0000000
CPCPR22      8.0000000
CPCPR23      8.0000000
CPCPR24      8.0000000
CPCPR25      8.0000000
CPCPR26      8.0000000
CPCPR27      8.0000000
CPCPR28      8.0000000
CPCPR29      8.0000000
CPCPR30      8.0000000
CPCPR31      8.0000000
CPCPR32      8.0000000
CPCPR33      8.0000000
CPCPR34      8.0000000
CPCPR35      8.0000000
CPCPR36      8.0000000
CPCPR37      8.0000000
CPCPR38      8.0000000
CPCPR39      8.0000000
CPCPR40      8.0000000
CPCPR41      8.0000000
CPCPR42      8.0000000
CPCPR43      8.0000000
CPCPR44      8.0000000
CPCPR45      8.0000000
CPCPR46      8.0000000
CPCPR47      8.0000000
CPCPR48      8.0000000
CPCPR49      8.0000000
CPCPR50      8.0000000
CPCPR51      8.0000000
CPCPR52      8.0000000
CPCPR53      8.0000000
CPCPR54      8.0000000
CPCPR55      8.0000000
CPCPR56      8.0000000
CPCPR57      8.0000000
CPCPR58      8.0000000
CPCPR59      8.0000000
CPCPR60      8.0000000
CPCPR61      8.0000000
CPCPR62      8.0000000
CPCPR63      8.0000000
CPCPR64      8.0000000
CPCPR65      8.0000000
CPCPR66      8.0000000
CPCPR67      8.0000000
CPCPR68      8.0000000
CPCPR69      8.0000000
CPCPR70      8.0000000
CPCPR71      8.0000000
CPCPR72      8.0000000
CPCPR73      8.0000000
CPCPR74      8.0000000
CPCPR75      8.0000000
CPCPR76      8.0000000
CPCPR77      8.0000000
CPCPR78      8.0000000
CPCPR79      8.0000000
CPCPR80      8.0000000
CPCPR81      8.0000000
CPCPR82      8.0000000
CPCPR83      8.0000000
CPCPR84      8.0000000
CPCPR85      8.0000000
CPCPR86      8.0000000
CPCPR87      8.0000000
CPCPR88      8.0000000
CPCPR89      8.0000000
CPCPR90      8.0000000
CPCPR91      8.0000000
CPCPR92      8.0000000
CPCPR93      8.0000000
CPCPR94      8.0000000
CPCPR95      8.0000000
CPCPR96      8.0000000
CPCPR97      8.0000000
CPCPR98      8.0000000
CPCPR99      8.0000000
CPCPR100     8.0000000
CPCPR101     8.0000000
CPCPR102     8.0000000
CPCPR103     8.0000000
CPCPR104     8.0000000
CPCPR105     8.0000000
CPCPR106     8.0000000
CPCPR107     8.0000000
CPCPR108     8.0000000
CPCPR109     8.0000000
CPCPR110     8.0000000
CPCPR111     8.0000000
CPCPR112     8.0000000
CPCPR113     8.0000000
CPCPR114     8.0000000
CPCPR115     8.0000000
CPCPR116     8.0000000
CPCPR117     8.0000000
CPCPR118     8.0000000
CPCPR119     8.0000000
CPCPR120     8.0000000
CPCPR121     8.0000000
CPCPR122     8.0000000
CPCPR123     8.0000000
CPCPR124     8.0000000
CPCPR125     8.0000000
CPCPR126     8.0000000
CPCPR127     8.0000000
CPCPR128     8.0000000
CPCPR129     8.0000000
CPCPR130     8.0000000
CPCPR131     8.0000000
CPCPR132     8.0000000
CPCPR133     8.0000000
CPCPR134     8.0000000
CPCPR135     8.0000000
CPCPR136     8.0000000
CPCPR137     8.0000000
CPCPR138     8.0000000
CPCPR139     8.0000000
CPCPR140     8.0000000
CPCPR141     8.0000000
CPCPR142     8.0000000
CPCPR143     8.0000000
CPCPR144     8.0000000
CPCPR145     8.0000000
CPCPR146     8.0000000
CPCPR147     8.0000000
CPCPR148     8.0000000
CPCPR149     8.0000000
CPCPR150     8.0000000
CPCPR151     8.0000000
CPCPR152     8.0000000
CPCPR153     8.0000000
CPCPR154     8.0000000
CPCPR155     8.0000000
CPCPR156     8.0000000
CPCPR157     8.0000000
CPCPR158     8.0000000
CPCPR159     8.0000000
CPCPR160     8.0000000
CPCPR161     8.0000000
CPCPR162     8.0000000
CPCPR163     8.0000000
CPCPR164     8.0000000
CPCPR165     8.0000000
CPCPR166     8.0000000
CPCPR167     8.0000000
CPCPR168     8.0000000
CPCPR169     8.0000000
CPCPR170     8.0000000
CPCPR171     8.0000000
CPCPR172     8.0000000
CPCPR173     8.0000000
CPCPR174     8.0000000
CPCPR175     8.0000000
CPCPR176     8.0000000
CPCPR177     8.0000000
CPCPR178     8.0000000
CPCPR179     8.0000000
CPCPR180     8.0000000
CPCPR181     8.0000000
CPCPR182     8.0000000
CPCPR183     8.0000000
CPCPR184     8.0000000
CPCPR185     8.0000000
CPCPR186     8.0000000
CPCPR187     8.0000000
CPCPR188     8.0000000
CPCPR189     8.0000000
CPCPR190     8.0000000
CPCPR191     8.0000000
CPCPR192     8.0000000
CPCPR193     8.0000000
CPCPR194     8.0000000
CPCPR195     8.0000000
CPCPR196     8.0000000
CPCPR197     8.0000000
CPCPR198     8.0000000
CPCPR199     8.0000000
CPCPR200     8.0000000
CPCPR201     8.0000000
CPCPR202     8.0000000
CPCPR203     8.0000000
CPCPR204     8.0000000
CPCPR205     8.0000000
CPCPR206     8.0000000
CPCPR207     8.0000000
CPCPR208     8.0000000
CPCPR209     8.0000000
CPCPR210     8.0000000
CPCPR211     8.0000000
CPCPR212     8.0000000
CPCPR213     8.0000000
CPCPR214     8.0000000
CPCPR215     8.0000000
CPCPR216     8.0000000
CPCPR217     8.0000000
CPCPR218     8.0000000
CPCPR219     8.0000000
CPCPR220     8.0000000
CPCPR221     8.0000000
CPCPR222     8.0000000
CPCPR223     8.0000000
CPCPR224     8.0000000
CPCPR225     8.0000000
CPCPR226     8.0000000
CPCPR227     8.0000000
CPCPR228     8.0000000
CPCPR229     8.0000000
CPCPR230     8.0000000
CPCPR231     8.0000000
CPCPR232     8.0000000
CPCPR233     8.0000000
CPCPR23
```

# Aromatic expansion

asb-155b in CDCl3 1H-13C CORR LONG RANGE D6 corretto!! 21-11-2012

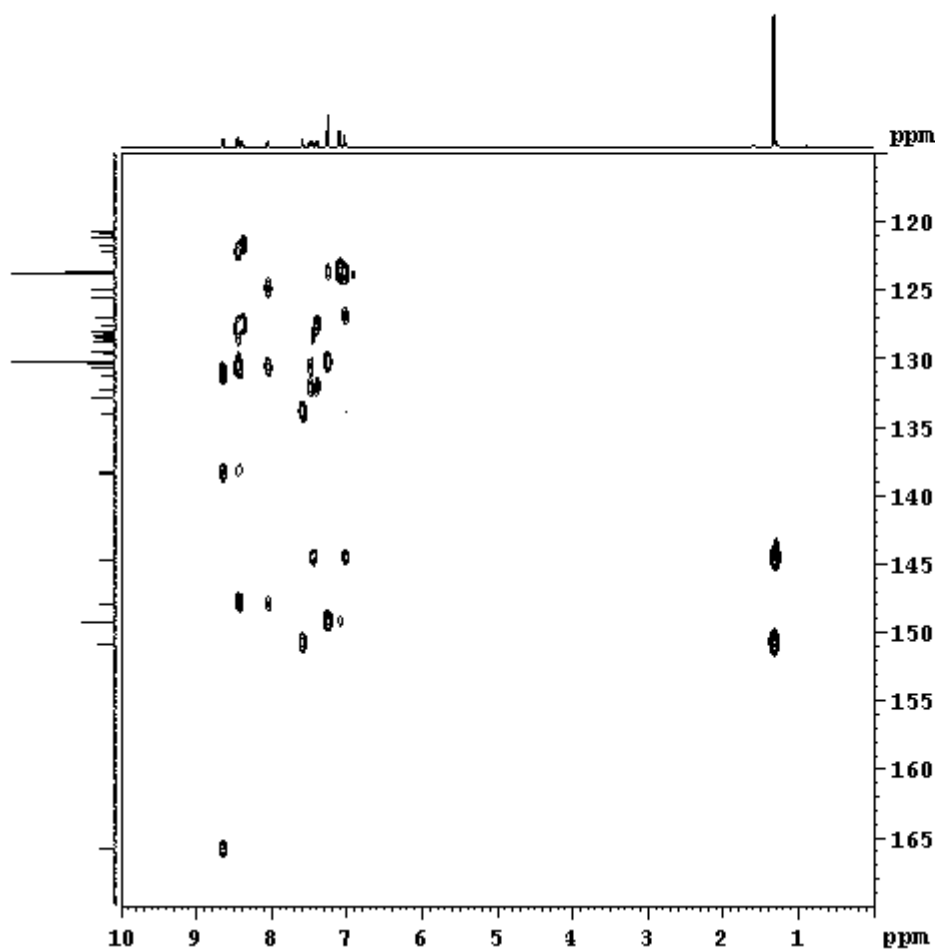

```

Current Data Parameters
NAME      asb-155b
EXPNO     3
PROCNO    1

F2 - Acquisition Parameters
Date_     20121124
Time      17.38
INSTRUM   spect
PROBHD    5 mm BBO (1H-13
PULPROG   zgpg30
TD         65536
SOLVENT   cdcl3
NS         32
DS         4
SWH        4166.1110 Hz
FIDRES     0.000000 Hz
AQ         0.0026700 sec
RG         271.25
CF         80.000 U/s
CQ         0.00 U/s
CY         248.2 Hz
CZ         145.000000 Hz
DECT13     0.000000
d0         0.000000 sec
d1         0.000000 sec
d2         0.000000 sec
d3         0.000000 sec
d4         0.000000 sec
d5         0.000000 sec
d6         0.000000 sec

===== CHANNEL f1 =====
NUC1       13C
P1         10.00 U/s
PC         21.20 U/s
PS1        3.30 dB
SFO1       500.1324853 MHz

===== CHANNEL f2 =====
NUC2       13C
P2         13.00 U/s
PC         -0.80 dB
SFO2       125.7705488 MHz

===== CHANNEL f3 =====
CPDPRG2    zgpg30
CPDPRG3    zgpg30
CPDPRG4    zgpg30
CPDPRG5    zgpg30
CPDPRG6    zgpg30
CPDPRG7    zgpg30
CPDPRG8    zgpg30
CPDPRG9    zgpg30
CPDPRG10   zgpg30
CPDPRG11   zgpg30
CPDPRG12   zgpg30
CPDPRG13   zgpg30
CPDPRG14   zgpg30
CPDPRG15   zgpg30
CPDPRG16   zgpg30
CPDPRG17   zgpg30
CPDPRG18   zgpg30
CPDPRG19   zgpg30
CPDPRG20   zgpg30
CPDPRG21   zgpg30
CPDPRG22   zgpg30
CPDPRG23   zgpg30
CPDPRG24   zgpg30
CPDPRG25   zgpg30
CPDPRG26   zgpg30
CPDPRG27   zgpg30
CPDPRG28   zgpg30
CPDPRG29   zgpg30
CPDPRG30   zgpg30
CPDPRG31   zgpg30
CPDPRG32   zgpg30
CPDPRG33   zgpg30
CPDPRG34   zgpg30
CPDPRG35   zgpg30
CPDPRG36   zgpg30
CPDPRG37   zgpg30
CPDPRG38   zgpg30
CPDPRG39   zgpg30
CPDPRG40   zgpg30
CPDPRG41   zgpg30
CPDPRG42   zgpg30
CPDPRG43   zgpg30
CPDPRG44   zgpg30
CPDPRG45   zgpg30
CPDPRG46   zgpg30
CPDPRG47   zgpg30
CPDPRG48   zgpg30
CPDPRG49   zgpg30
CPDPRG50   zgpg30
CPDPRG51   zgpg30
CPDPRG52   zgpg30
CPDPRG53   zgpg30
CPDPRG54   zgpg30
CPDPRG55   zgpg30
CPDPRG56   zgpg30
CPDPRG57   zgpg30
CPDPRG58   zgpg30
CPDPRG59   zgpg30
CPDPRG60   zgpg30
CPDPRG61   zgpg30
CPDPRG62   zgpg30
CPDPRG63   zgpg30
CPDPRG64   zgpg30
CPDPRG65   zgpg30
CPDPRG66   zgpg30
CPDPRG67   zgpg30
CPDPRG68   zgpg30
CPDPRG69   zgpg30
CPDPRG70   zgpg30
CPDPRG71   zgpg30
CPDPRG72   zgpg30
CPDPRG73   zgpg30
CPDPRG74   zgpg30
CPDPRG75   zgpg30
CPDPRG76   zgpg30
CPDPRG77   zgpg30
CPDPRG78   zgpg30
CPDPRG79   zgpg30
CPDPRG80   zgpg30
CPDPRG81   zgpg30
CPDPRG82   zgpg30
CPDPRG83   zgpg30
CPDPRG84   zgpg30
CPDPRG85   zgpg30
CPDPRG86   zgpg30
CPDPRG87   zgpg30
CPDPRG88   zgpg30
CPDPRG89   zgpg30
CPDPRG90   zgpg30
CPDPRG91   zgpg30
CPDPRG92   zgpg30
CPDPRG93   zgpg30
CPDPRG94   zgpg30
CPDPRG95   zgpg30
CPDPRG96   zgpg30
CPDPRG97   zgpg30
CPDPRG98   zgpg30
CPDPRG99   zgpg30
CPDPRG100  zgpg30

F1 - Acquisition parameters
NUC1       1H
P1         10.00 U/s
PC         21.20 U/s
PS1        3.30 dB
SFO1       500.1324853 MHz

F2 - Processing parameters
SI         32768
SF         500.1324853 MHz
WDW         EM
SSB         0
GB          0.00 Hz
CB          0
SC          1.80

F3 - Processing parameters
SI         32768
SF         125.7705488 MHz
WDW         EM
SSB         0
GB          0.00 Hz
CB          0
SC          1.80
    
```

## 2.5. Derivative 4.

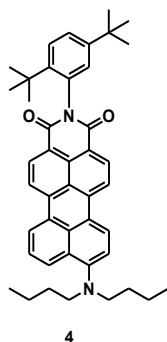

$^1\text{H}$  full spectral range.

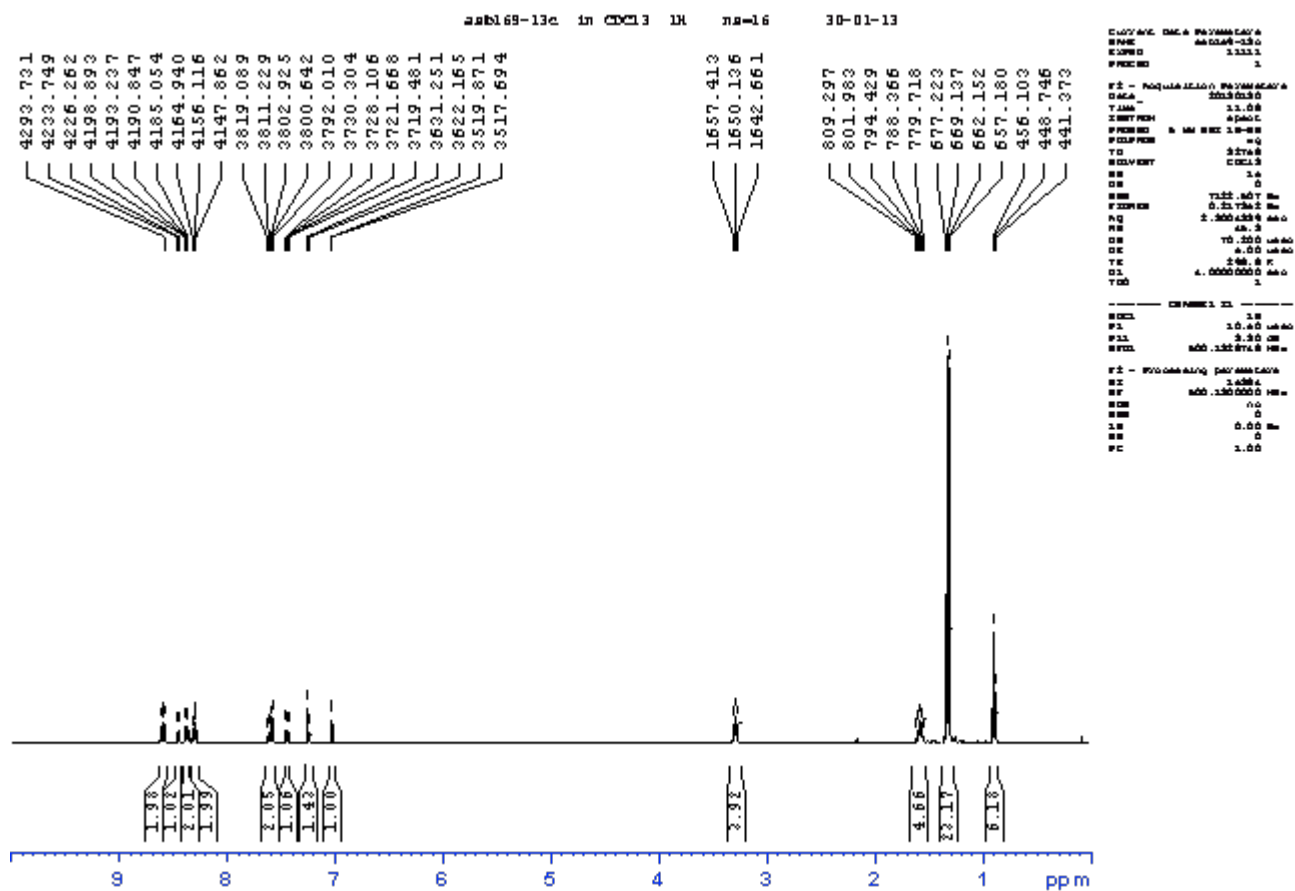

## Aromatic region

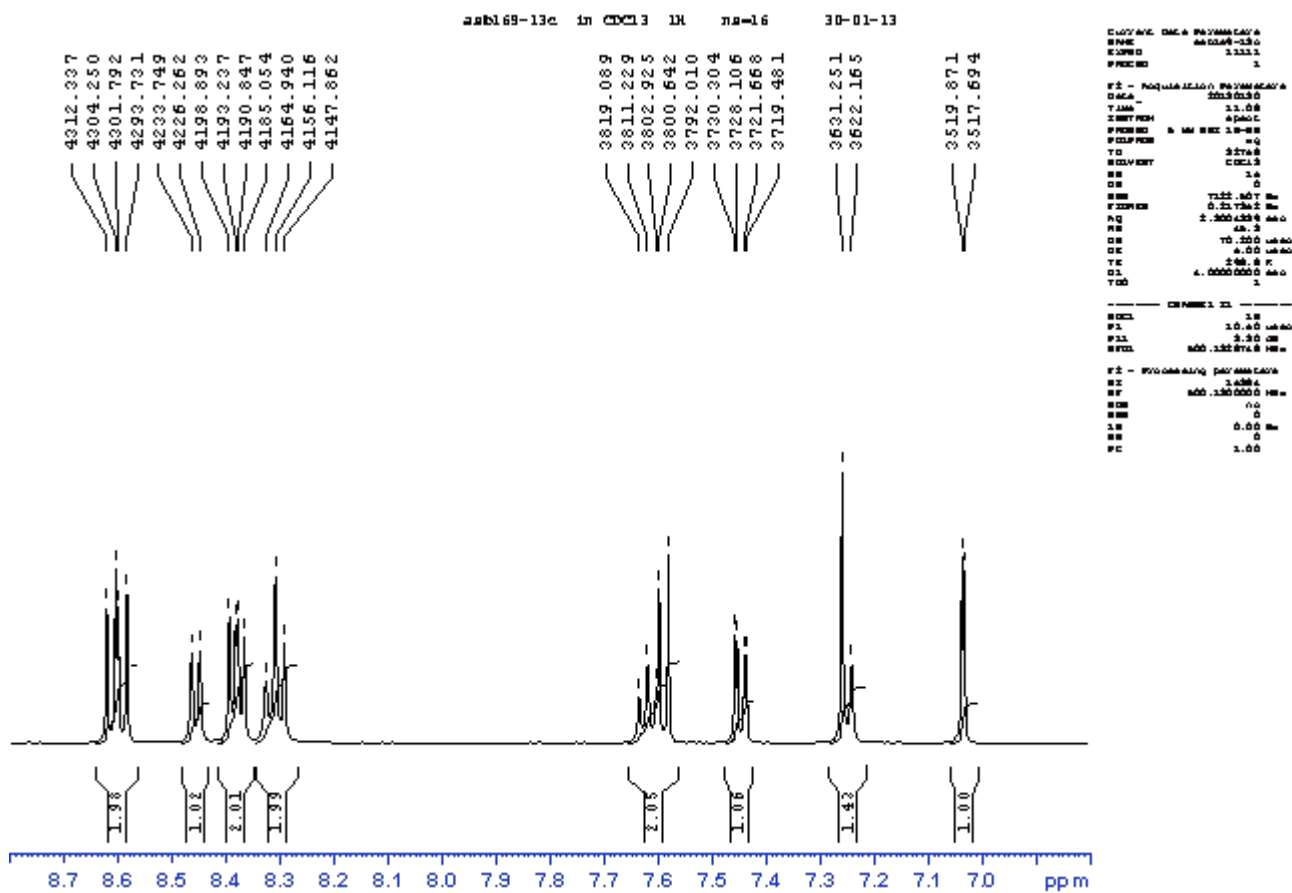

## Alifatic region

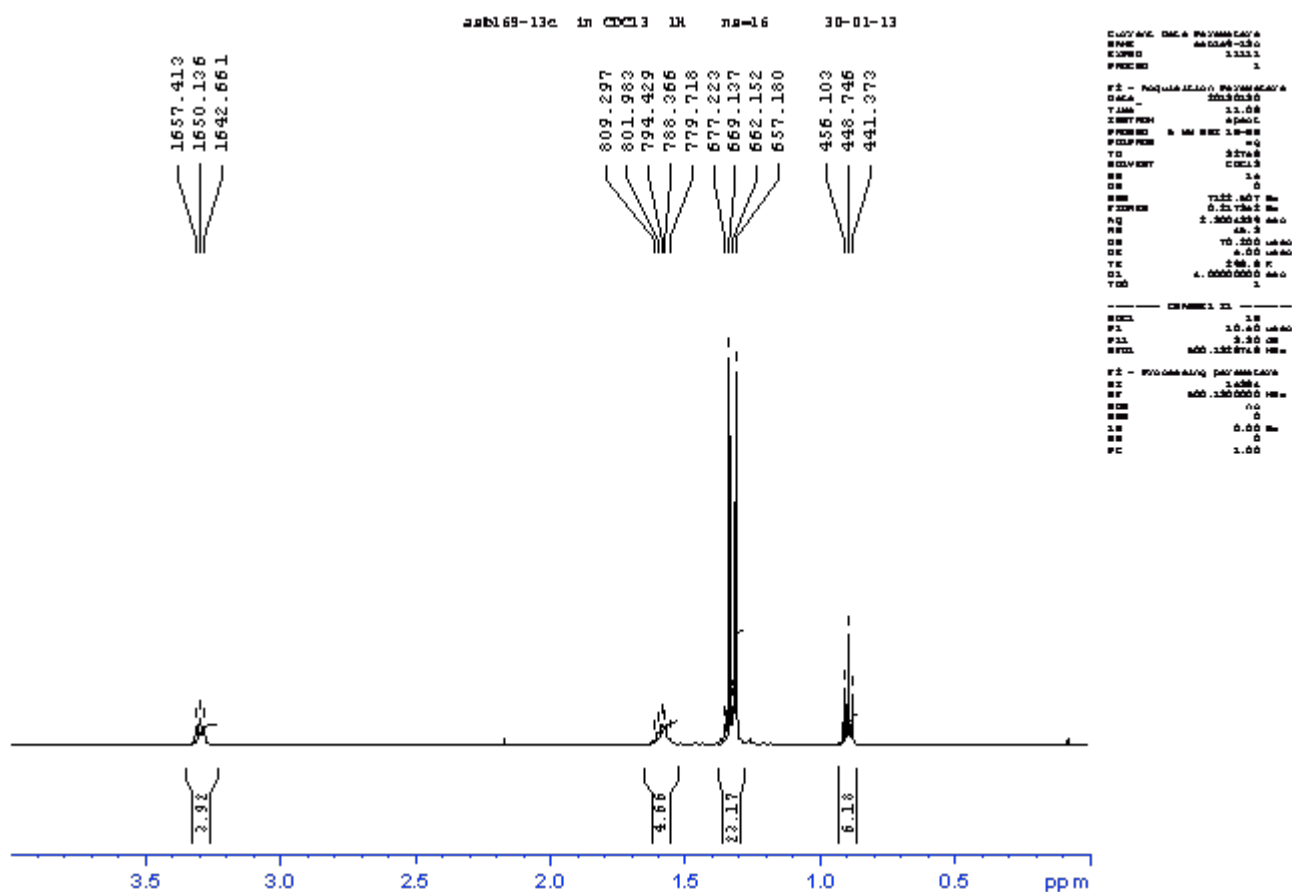

<sup>13</sup>C full spectral range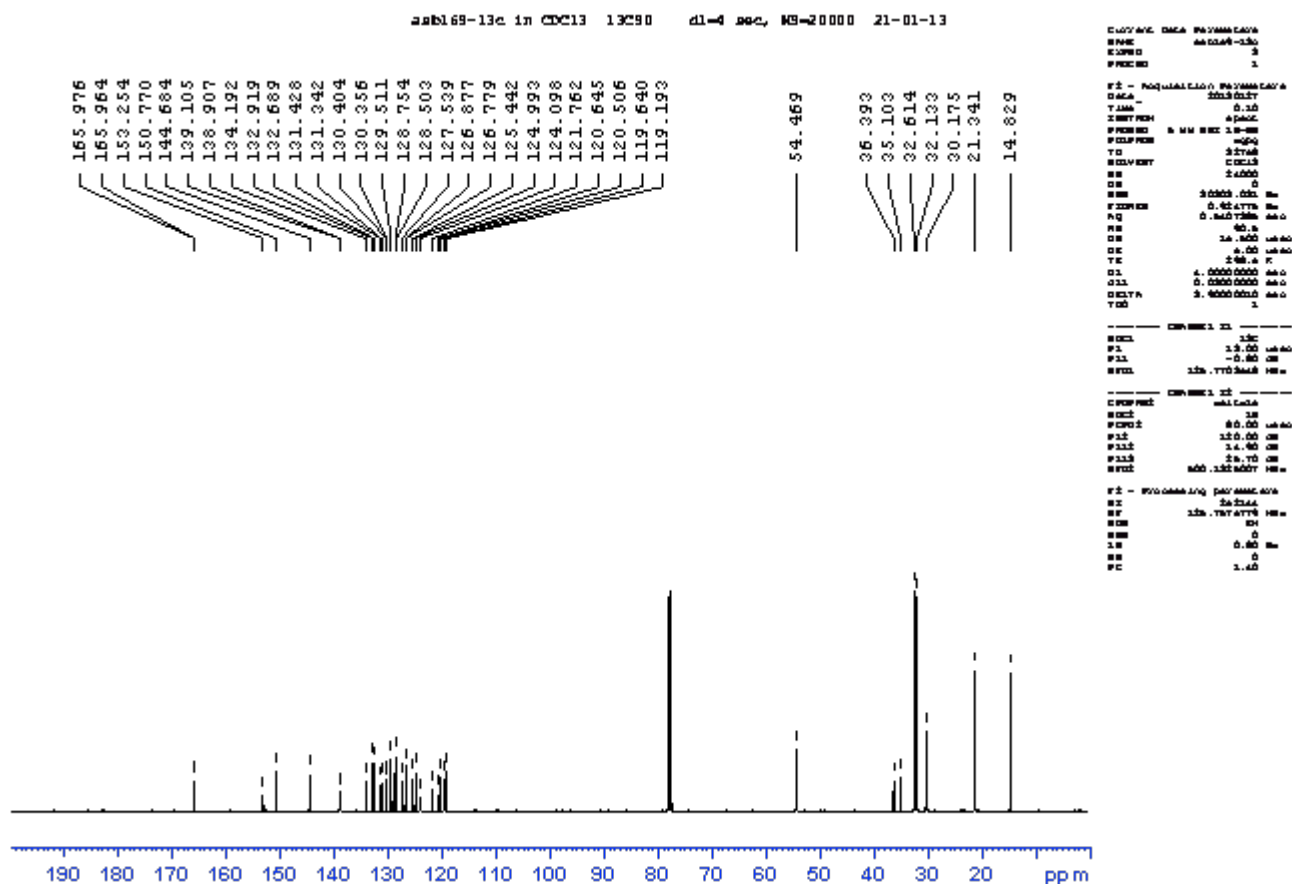

Aromatic region

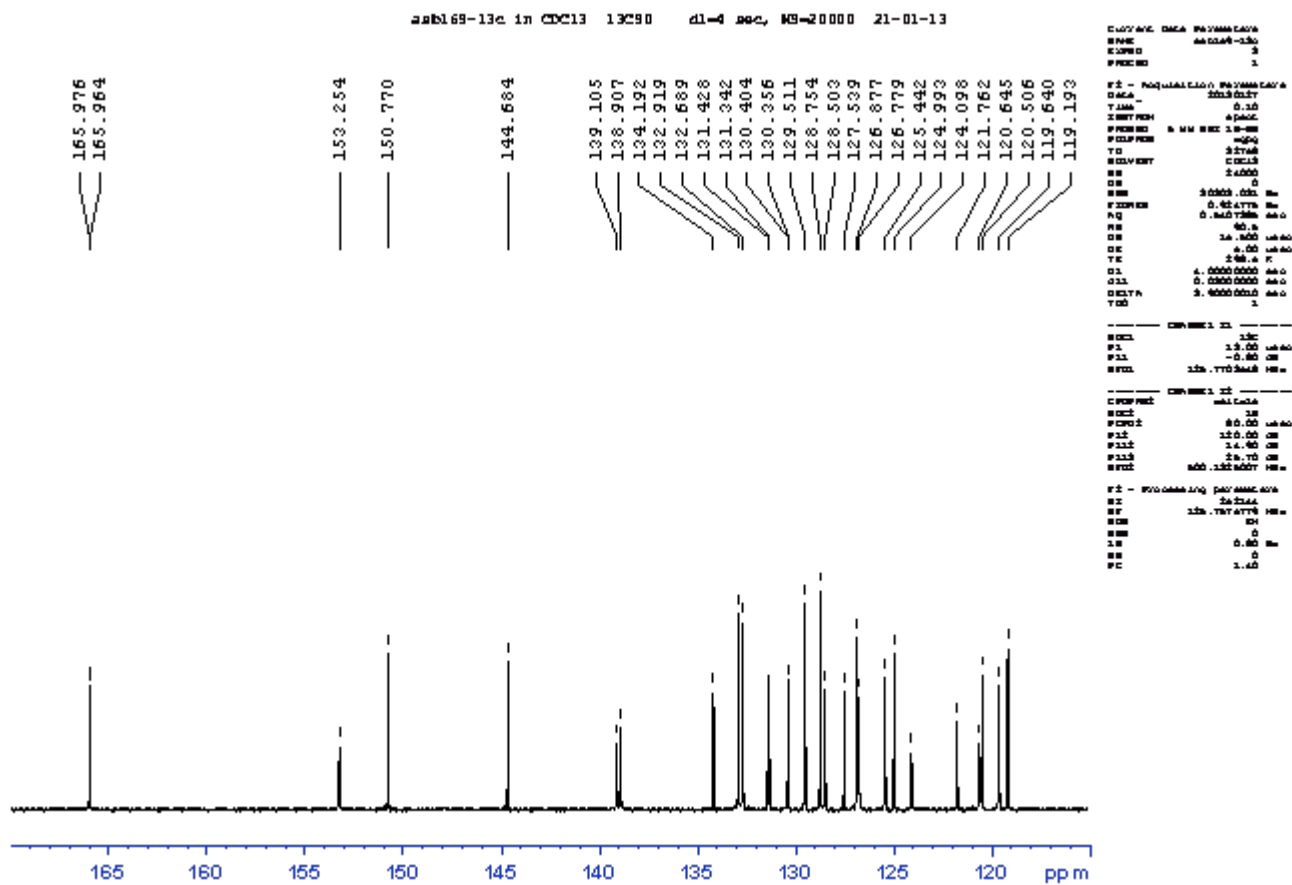

asbl69-13c in CDCl3 13C90 d1=4 sec, NS=20000 21-01-13

54.469

36.393

35.103

32.614

32.133

30.175

21.341

14.829

85 80 75 70 65 60 55 50 45 40 35 30 25 20 15 10 5 ppm

[illegible]

# <sup>1</sup>H COSY full spectral range

ash169-13c in CDCl<sub>3</sub> COSY6PQF TD=1024-128, NS=16

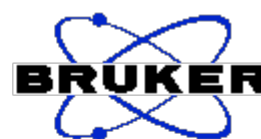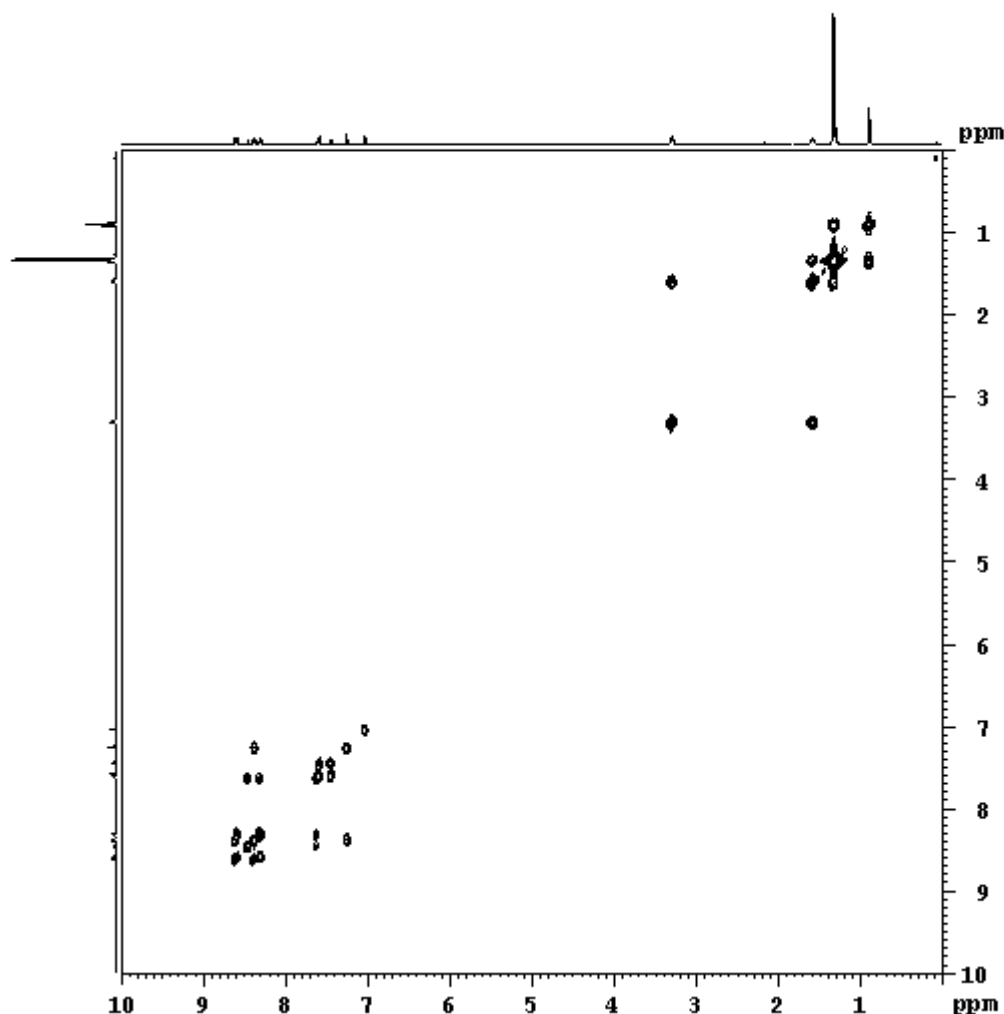

Current Data Parameters  
NAME ash169-13c  
EXPNO 2  
PROCNO 1

F2 - Acquisition Parameters  
Date\_ 20150120  
Time 17.56  
INSTRUM spect  
PROBHD 5 mm BBI 1H-400  
PULPROG zgpg30  
TD 1024  
SOLVENT CDCl<sub>3</sub>  
NS 16  
DS 16  
SWH 6388.110 Hz  
FIDRES 0.045085 Hz  
AQ 0.0228700 sec  
RG 287.4  
IN 60.000 cm/s  
DE 6.00 cm  
TE 298.2 K  
d0 0.0000000 sec  
d1 2.0000000 sec  
d15 0.0000000 sec  
d16 0.0000000 sec  
d20 0.0001610 sec

===== CHANNEL F1 =====  
NUC1 1H  
P1 6.00 cm  
PL 10.00 cm  
PC1 3.30 dB  
SFO1 500.1325652 MHz

===== CHANNEL F2 =====  
CPDPRG2 SSB 1.00  
CROSS2 SSB 1.00  
NUC2 13C  
PC2 10.00 dB  
PL2 10.00 dB  
P15 1000.00 cm

F1 - Acquisition parameters  
EXPNO 1  
TD 128  
SFO1 500.1326 MHz  
FIDRES 48.344677 Hz  
SR 12.573 ppm  
INSTRUM spect

F2 - Processing parameters  
SI 1024  
SF 500.1200040 MHz  
WDW SSB  
SSB 0  
LB 0.00 Hz  
GB 0  
PC 0.60

F1 - Processing parameters  
SI 1024  
PC2 0.00  
SF 500.1200040 MHz  
WDW SSB  
SSB 0  
LB 0.00 Hz  
GB 0



# Aromatic region

ash169-13c in CDCl3 COSY6PQF TD=1024-128, NS=16

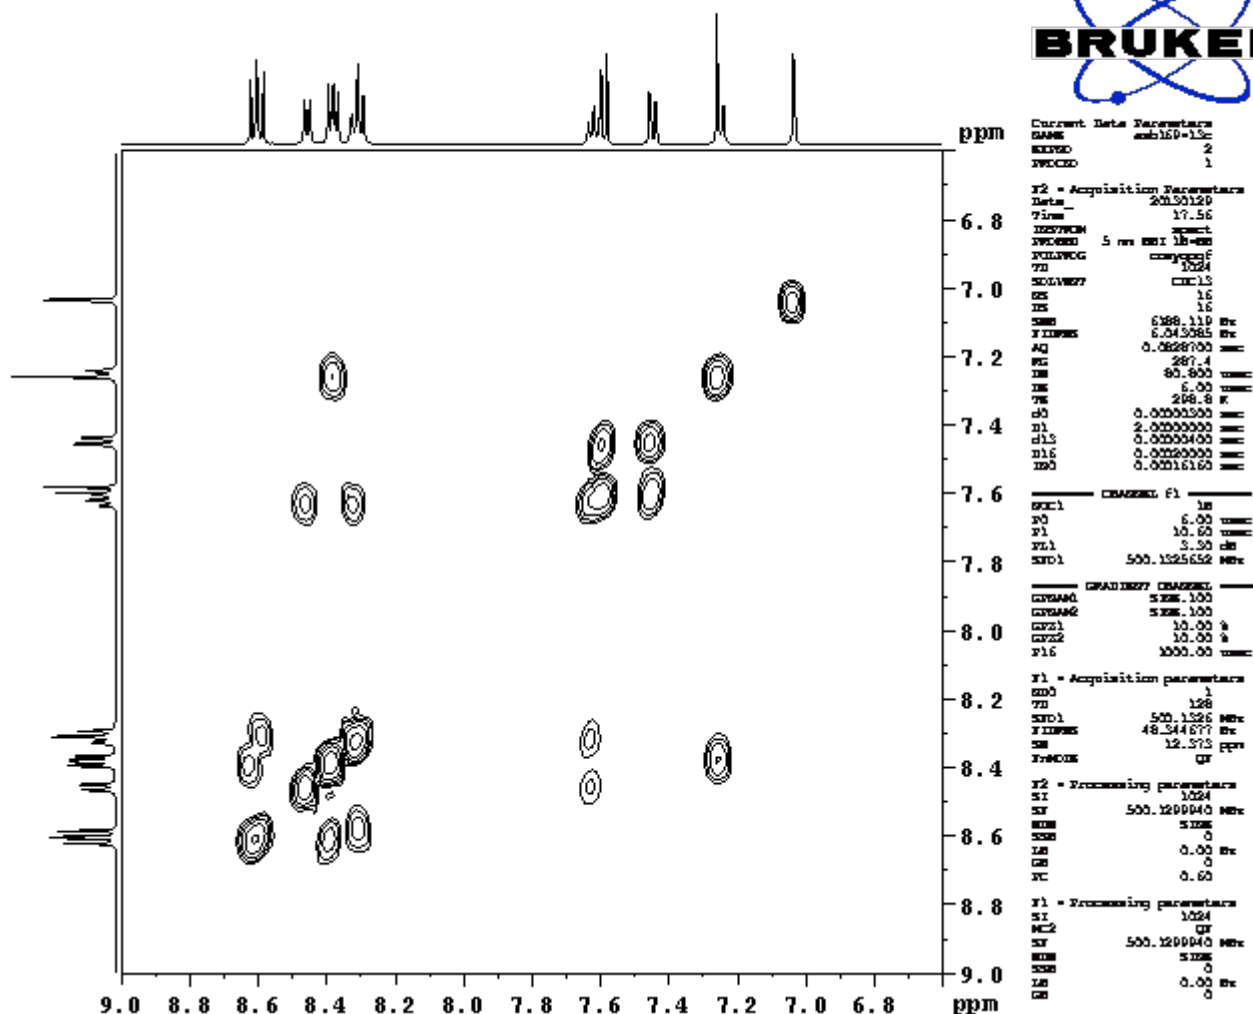

asb169-13F in CDC13 13F CORR 22-01-2013

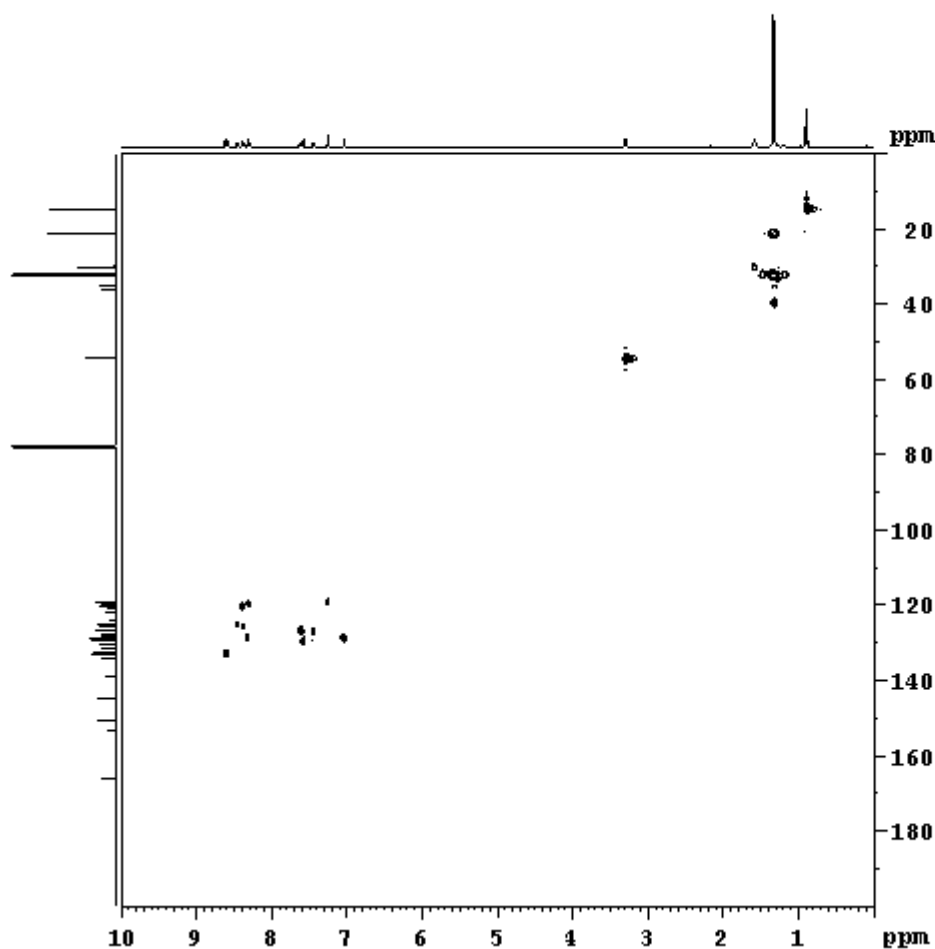[illegible]

asb169-13C in CDC13 13C COBB 22-01-2013

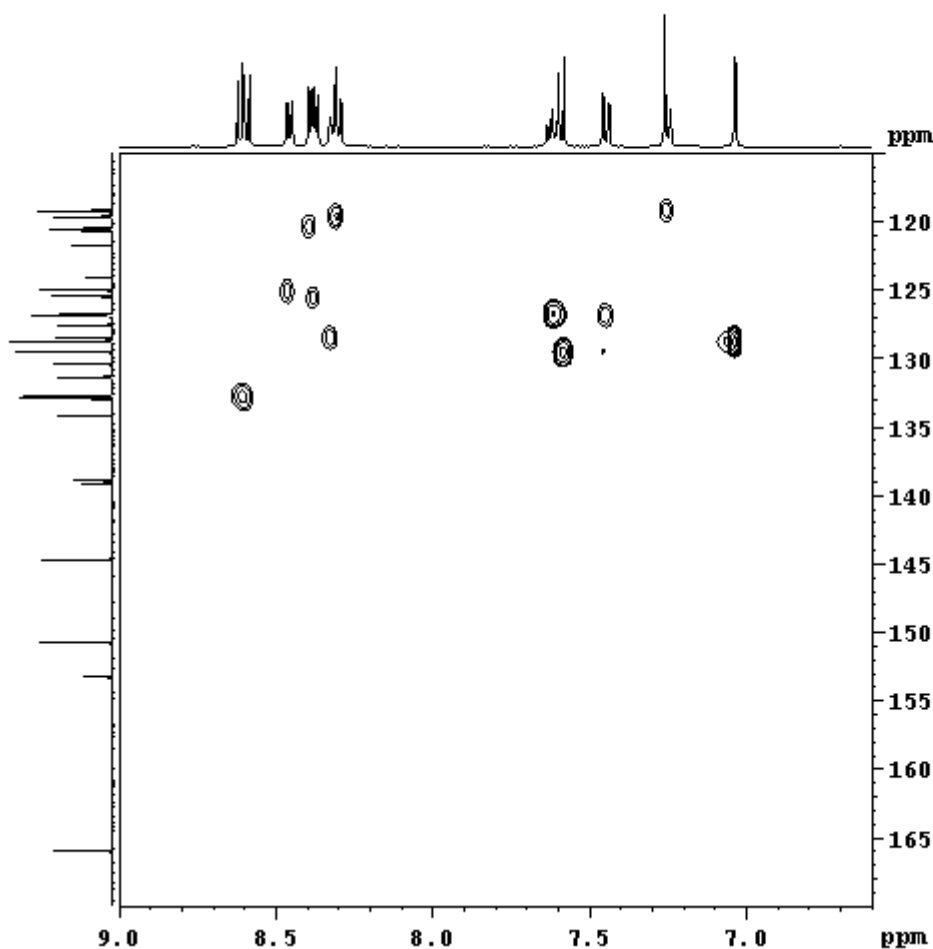[illegible]

# $^1\text{H}$ $^{13}\text{C}$ HETCOR long range coupling - full spectral range

asbl69-13c in CDCl3 1H-13C CORR LONG RANGE D6 corretto!! 25-01-2013

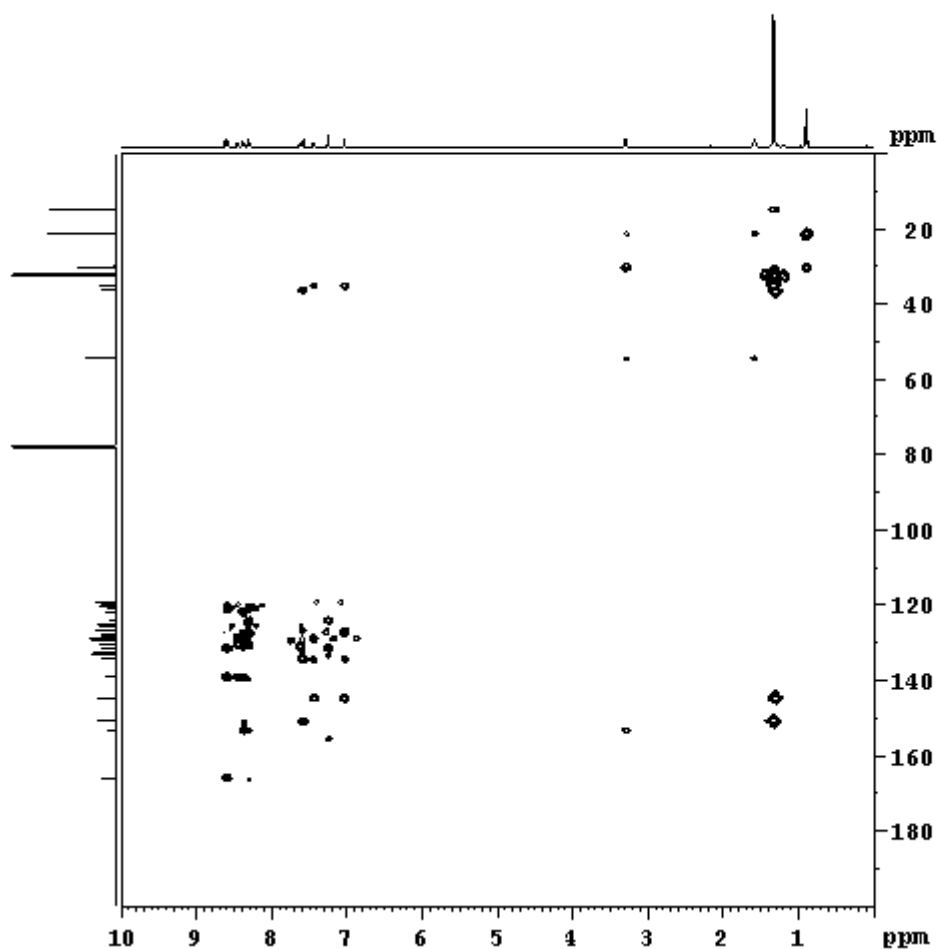

Current Data Parameters  
NAME asbl69-13c  
EXPNO 3  
PROCNO 1

F2 - Acquisition Parameters  
Date\_ 20130127  
Time 14.14  
INSTRUM spect  
PROBHD 5 mm BBO 1H-13C  
PULPROG zgpg30  
TD 65536  
SOLVENT CDCl3  
NS 400  
DS 4  
SWH 4166.110 Hz  
F2 4166.110 Hz  
AQ 0.0826700 sec  
RG 1024  
CF 80.000 U/s  
CQ 0.00 U/s  
CY 238.4 Hz  
CZ 145.000000 sec  
DECT13 0.000000 sec  
d0 0.000000 sec  
d1 0.000000 sec  
d2 0.000000 sec  
d3 0.000000 sec  
d4 0.000000 sec  
d5 0.000000 sec  
d6 0.000000 sec

===== CHANNEL f1 =====  
NUC1 13  
P1 10.00 U/s  
PC 21.30 U/s  
PL1 3.30 dB  
SFO1 500.132485 MHz

===== CHANNEL f2 =====  
NUC2 1H  
P2 13.00 U/s  
PC -0.80 dB  
SFO2 125.759948 MHz

===== CHANNEL f3 =====  
CPDPRG2 zgpg30  
GPM1 300.00 Hz  
GPM2 300.00 Hz  
GPM3 300.00 Hz  
GPM4 300.00 Hz  
GPM5 300.00 Hz  
GPM6 300.00 Hz  
GPM7 300.00 Hz  
GPM8 300.00 Hz  
GPM9 300.00 Hz  
GPM10 300.00 Hz  
GPM11 300.00 Hz  
GPM12 300.00 Hz  
GPM13 300.00 Hz  
GPM14 300.00 Hz  
GPM15 300.00 Hz  
GPM16 300.00 Hz  
GPM17 300.00 Hz  
GPM18 300.00 Hz  
GPM19 300.00 Hz  
GPM20 300.00 Hz  
GPM21 300.00 Hz  
GPM22 300.00 Hz  
GPM23 300.00 Hz  
GPM24 300.00 Hz  
GPM25 300.00 Hz  
GPM26 300.00 Hz  
GPM27 300.00 Hz  
GPM28 300.00 Hz  
GPM29 300.00 Hz  
GPM30 300.00 Hz  
GPM31 300.00 Hz  
GPM32 300.00 Hz  
GPM33 300.00 Hz  
GPM34 300.00 Hz  
GPM35 300.00 Hz  
GPM36 300.00 Hz  
GPM37 300.00 Hz  
GPM38 300.00 Hz  
GPM39 300.00 Hz  
GPM40 300.00 Hz  
GPM41 300.00 Hz  
GPM42 300.00 Hz  
GPM43 300.00 Hz  
GPM44 300.00 Hz  
GPM45 300.00 Hz  
GPM46 300.00 Hz  
GPM47 300.00 Hz  
GPM48 300.00 Hz  
GPM49 300.00 Hz  
GPM50 300.00 Hz  
GPM51 300.00 Hz  
GPM52 300.00 Hz  
GPM53 300.00 Hz  
GPM54 300.00 Hz  
GPM55 300.00 Hz  
GPM56 300.00 Hz  
GPM57 300.00 Hz  
GPM58 300.00 Hz  
GPM59 300.00 Hz  
GPM60 300.00 Hz  
GPM61 300.00 Hz  
GPM62 300.00 Hz  
GPM63 300.00 Hz  
GPM64 300.00 Hz  
GPM65 300.00 Hz  
GPM66 300.00 Hz  
GPM67 300.00 Hz  
GPM68 300.00 Hz  
GPM69 300.00 Hz  
GPM70 300.00 Hz  
GPM71 300.00 Hz  
GPM72 300.00 Hz  
GPM73 300.00 Hz  
GPM74 300.00 Hz  
GPM75 300.00 Hz  
GPM76 300.00 Hz  
GPM77 300.00 Hz  
GPM78 300.00 Hz  
GPM79 300.00 Hz  
GPM80 300.00 Hz  
GPM81 300.00 Hz  
GPM82 300.00 Hz  
GPM83 300.00 Hz  
GPM84 300.00 Hz  
GPM85 300.00 Hz  
GPM86 300.00 Hz  
GPM87 300.00 Hz  
GPM88 300.00 Hz  
GPM89 300.00 Hz  
GPM90 300.00 Hz  
GPM91 300.00 Hz  
GPM92 300.00 Hz  
GPM93 300.00 Hz  
GPM94 300.00 Hz  
GPM95 300.00 Hz  
GPM96 300.00 Hz  
GPM97 300.00 Hz  
GPM98 300.00 Hz  
GPM99 300.00 Hz  
GPM100 300.00 Hz

F1 - Acquisition parameters  
NUC1 1H  
P1 10.00 U/s  
PC 21.30 U/s  
PL1 3.30 dB  
SFO1 500.132485 MHz

F2 - Processing parameters  
SI 32768  
SF 500.132485 MHz  
WDW EM  
SSB 0  
LB 0.00 Hz  
GB 0  
RC 1.40

F1 - Processing parameters  
SI 32768  
SF 500.132485 MHz  
WDW EM  
SSB 0  
LB 0.00 Hz  
GB 0  
RC 1.40

# Aromatic region

asb169-13c in CDCl3 1H-13C CORR LONG RANGE D6 corretto!! 25-01-2013

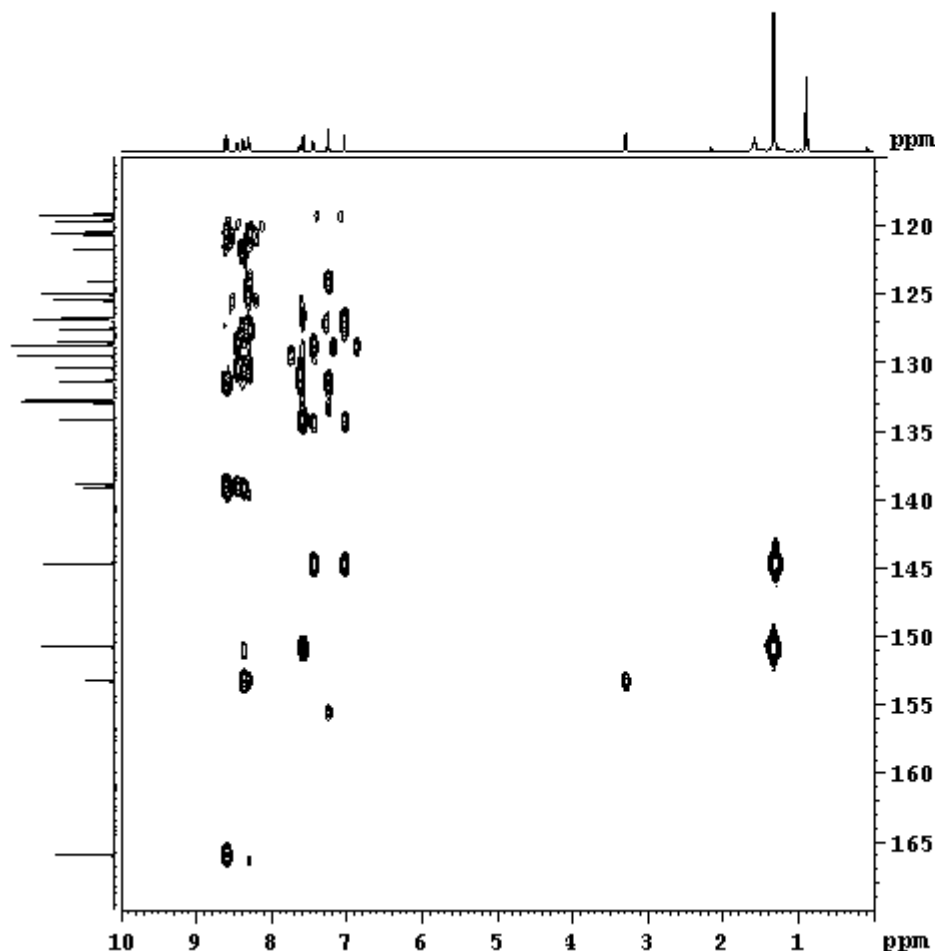

```

Current Data Parameters
NAME      asb169-13c
EXPNO     3
PROCNO    1

F2 - Acquisition Parameters
Date_     20130127
Time      14.14
INSTRUM   spect
PROBHD    5 mm BBO 1H-13
PULPROG   zgpg30
TD         65536
SOLVENT   cdcl3
NS         400
DS         4
AQ         4.1661110 s
RG         4.043040 s
FIDRES    0.0026700 s/ac
AQ        1.6364
CP         80.000 u.s.
CQ         0.00 u.s.
CY         2.00 s
CZ         1.45.0000000
DECT13    0.0000000
d0         0.0000000 s/ac
d1         0.0000000 s/ac
d2         0.0000000 s/ac
d3         0.0000000 s/ac
d4         0.0000000 s/ac
d5         0.0000000 s/ac
d6         0.0000000 s/ac
===== CHANNEL f1 =====
NUC1       13C
P1         10.00 u.s.
PC         21.00 u.s.
PL1        0.00 dB
PL2        0.00 dB
PL3        0.00 dB
===== CHANNEL f2 =====
NUC2       13C
P2         13.00 u.s.
PC         0.00 dB
PL2        0.00 dB
===== CHANNEL f3 =====
CPDPRG2   zgpg30
CPDPRG3   zgpg30
CPDPRG4   zgpg30
CPDPRG5   zgpg30
CPDPRG6   zgpg30
CPDPRG7   zgpg30
CPDPRG8   zgpg30
CPDPRG9   zgpg30
CPDPRG10  zgpg30
CPDPRG11  zgpg30
CPDPRG12  zgpg30
CPDPRG13  zgpg30
CPDPRG14  zgpg30
CPDPRG15  zgpg30
CPDPRG16  zgpg30
CPDPRG17  zgpg30
CPDPRG18  zgpg30
CPDPRG19  zgpg30
CPDPRG20  zgpg30
CPDPRG21  zgpg30
CPDPRG22  zgpg30
CPDPRG23  zgpg30
CPDPRG24  zgpg30
CPDPRG25  zgpg30
CPDPRG26  zgpg30
CPDPRG27  zgpg30
CPDPRG28  zgpg30
CPDPRG29  zgpg30
CPDPRG30  zgpg30
CPDPRG31  zgpg30
CPDPRG32  zgpg30
CPDPRG33  zgpg30
CPDPRG34  zgpg30
CPDPRG35  zgpg30
CPDPRG36  zgpg30
CPDPRG37  zgpg30
CPDPRG38  zgpg30
CPDPRG39  zgpg30
CPDPRG40  zgpg30
CPDPRG41  zgpg30
CPDPRG42  zgpg30
CPDPRG43  zgpg30
CPDPRG44  zgpg30
CPDPRG45  zgpg30
CPDPRG46  zgpg30
CPDPRG47  zgpg30
CPDPRG48  zgpg30
CPDPRG49  zgpg30
CPDPRG50  zgpg30
CPDPRG51  zgpg30
CPDPRG52  zgpg30
CPDPRG53  zgpg30
CPDPRG54  zgpg30
CPDPRG55  zgpg30
CPDPRG56  zgpg30
CPDPRG57  zgpg30
CPDPRG58  zgpg30
CPDPRG59  zgpg30
CPDPRG60  zgpg30
CPDPRG61  zgpg30
CPDPRG62  zgpg30
CPDPRG63  zgpg30
CPDPRG64  zgpg30
CPDPRG65  zgpg30
CPDPRG66  zgpg30
CPDPRG67  zgpg30
CPDPRG68  zgpg30
CPDPRG69  zgpg30
CPDPRG70  zgpg30
CPDPRG71  zgpg30
CPDPRG72  zgpg30
CPDPRG73  zgpg30
CPDPRG74  zgpg30
CPDPRG75  zgpg30
CPDPRG76  zgpg30
CPDPRG77  zgpg30
CPDPRG78  zgpg30
CPDPRG79  zgpg30
CPDPRG80  zgpg30
CPDPRG81  zgpg30
CPDPRG82  zgpg30
CPDPRG83  zgpg30
CPDPRG84  zgpg30
CPDPRG85  zgpg30
CPDPRG86  zgpg30
CPDPRG87  zgpg30
CPDPRG88  zgpg30
CPDPRG89  zgpg30
CPDPRG90  zgpg30
CPDPRG91  zgpg30
CPDPRG92  zgpg30
CPDPRG93  zgpg30
CPDPRG94  zgpg30
CPDPRG95  zgpg30
CPDPRG96  zgpg30
CPDPRG97  zgpg30
CPDPRG98  zgpg30
CPDPRG99  zgpg30
CPDPRG100 zgpg30
===== CHANNEL f4 =====
F4 - Acquisition parameters
NUC4       13C
P4         10.00 u.s.
PC         21.00 u.s.
PL4        0.00 dB
PL5        0.00 dB
PL6        0.00 dB
===== CHANNEL f5 =====
F5 - Processing parameters
SI         0
SF         125.761400 MHz
WDW         EM
SSB         0
GB          0.00 s
CB          0.00 s
SC          1.40
===== CHANNEL f6 =====
F6 - Processing parameters
SI         0
SF         125.761400 MHz
WDW         EM
SSB         0
GB          0.00 s
CB          0.00 s
SC          1.40

```

### 3. Figure S1. Examples of absorption and emission spectra of D-A and TW compounds.

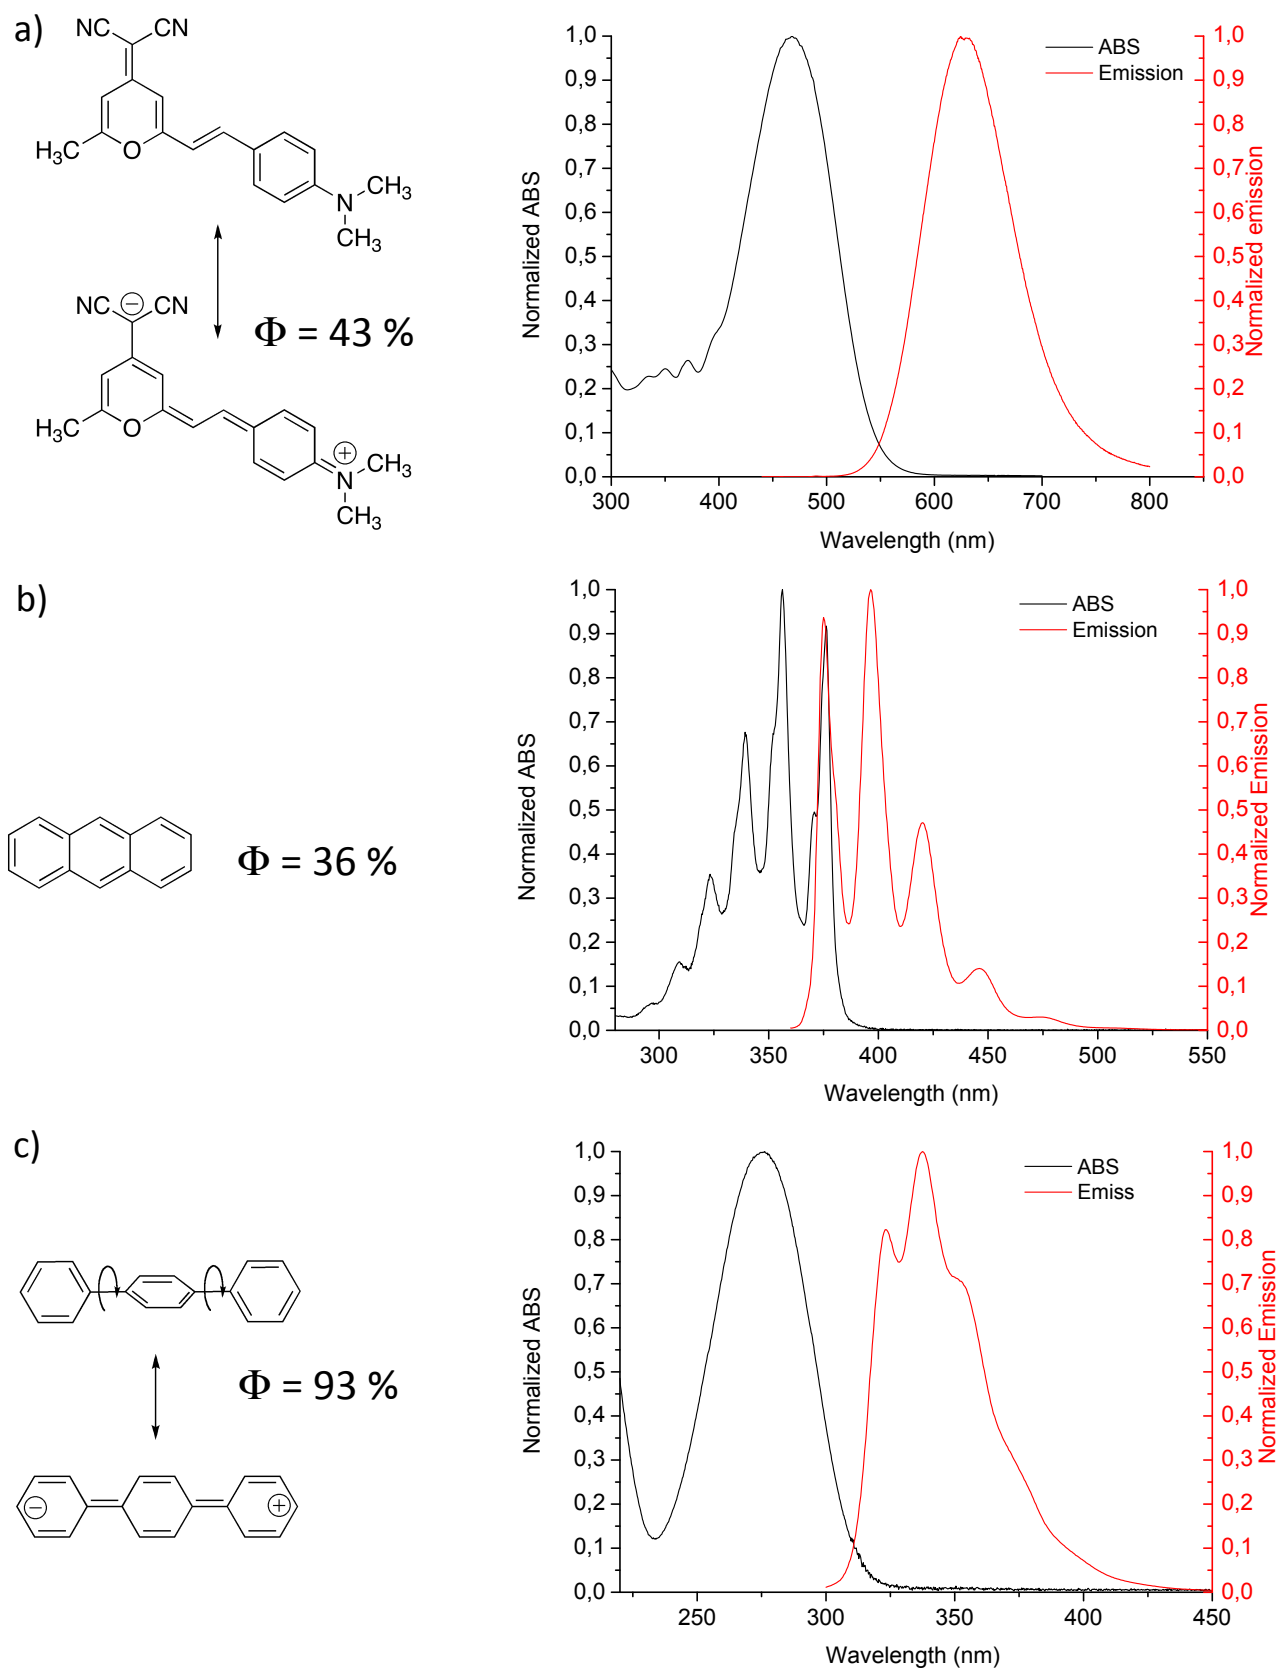

Figure S1. Comparison between the absorption (black curves), emission (red curves) and fluorescence quantum yields of representative molecules pertaining to: a) Donor-Acceptor compounds: the laser dye DCM (4-

(Dicyanomethylene)-2-methyl-6-(4-dimethylaminostyryl)-4H-pyran). Solvent MeOH. b) planar, rigid derivative: anthracene. Solvent cyclohexane. c) Twisted derivative: p-terphenyl. Solvent cyclohexane. (Source: <http://omlc.org/spectra/>).

#### 4. CV plots for derivatives 1-5.

For the electrochemical characterization all perylene derivatives were dissolved (concentration in the order of  $10^{-4}$  M) in the supporting electrolyte that was a 0.1 M solution of tetrabutylammonium perchlorate (Fluka, electrochemical grade,  $\geq 99.0\%$ ) in a solution of anhydrous acetonitrile (Aldrich, 99.8%) and dichloromethane (Aldrich, 99.8%), 2:1 by volume. Cyclic Voltammeteries at scan rate of 50 mV/s were carried out using a PARSTA2273 potentiostat in a single chamber three electrodes electrochemical cell in a glove box filled with Argon ( $[O_2] \leq 1$  ppm). The working, counter and pseudo-reference electrodes were a Glassy Carbon (GC) pin (3mm diameter), a Pt flag, and a Ag/AgCl wire, respectively. The GC surface was polished with alumina 0.1  $\mu$ m suspension, sonicated for 15 min. in deionized water and washed with 2-propanol before using. The Ag/AgCl pseudo-reference electrode was calibrated before and after each measurement using a 1 mM ferrocene solution in the electrolyte.

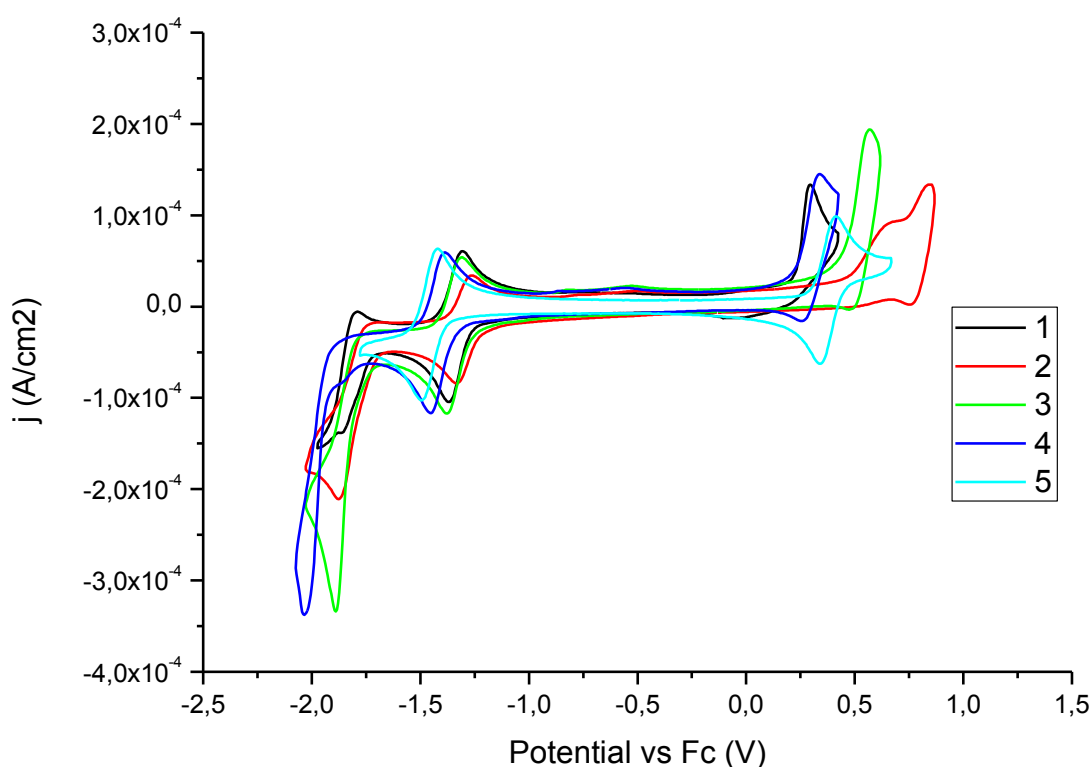

Figure S2. Cyclic voltammetry plots for derivatives **1-5**  $10^{-4}$  M solution in acetonitrile with 0.1 M tetrabutylammonium *p*-toluenesulfonate as the supporting electrolyte.



## 5. Spectroelectrochemical characterization of derivatives 1-5.

For the spectroelectrochemical (SE) characterization all perylene derivatives were dissolved (concentration in the order of  $10^{-4}$  M) in the supporting electrolyte that was a 0.1 M solution of tetrabutylammonium perchlorate (Fluka, electrochemical grade,  $\geq 99.0\%$ ) in a solution of anhydrous acetonitrile (Aldrich, 99.8%) and dichloromethane (Aldrich, 99.8%), 2:1 by volume. Potentiostatic pulse were applied using a PARSTA2273 potentiostat with a single chamber three electrodes SE optical cuvette in a glove box filled with Nitrogen ( $[O_2, H_2O] \leq 0.1$  ppm). The working, counter and pseudo-reference electrodes were a gold mesh ( $1\text{cm}^2$ ), a Pt wire and a Ag/AgCl wire, respectively. The Ag/AgCl pseudo-reference electrode was calibrated before and after each measurement using a 1 mM ferrocene solution in the electrolyte. Optical SE cuvette has an optical path of 1mm. Spectra are taken using an Als Co. SEC2000 spectrophotometer. All the spectra are taken after the applications of a potential bias for a time long enough, minimum 30s, to reach the optical equilibrium state for that applied potential.

### 5.1. Derivative 1.

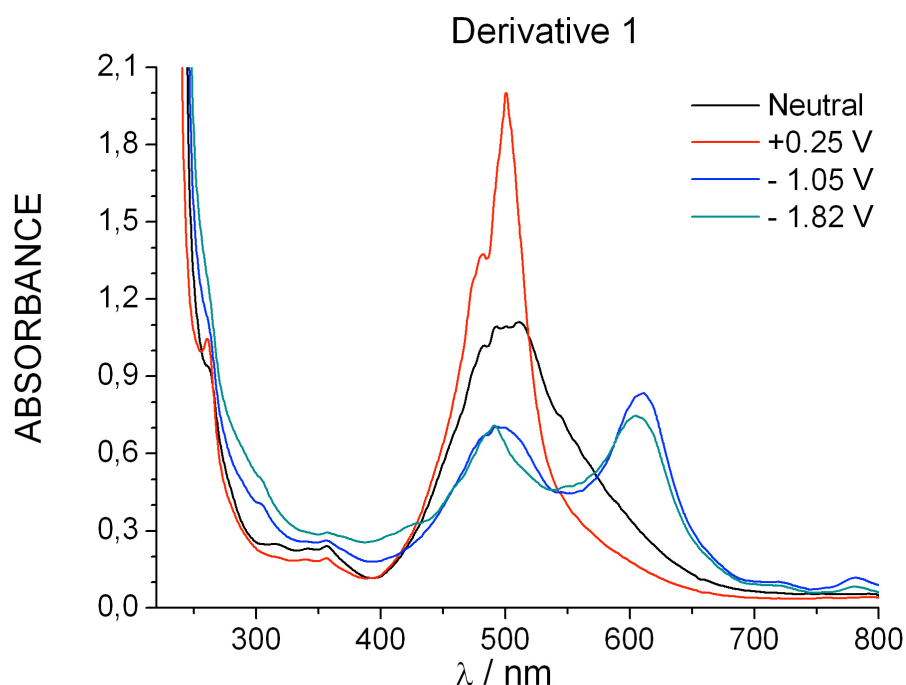

Figure S3. Spectroelectrochemical characterization of derivative 1  $10^{-4}$  M solution in acetonitrile with 0.1 M tetrabutylammonium p-toluenesulfonate as the supporting electrolyte.

## 5.2. Derivative 2

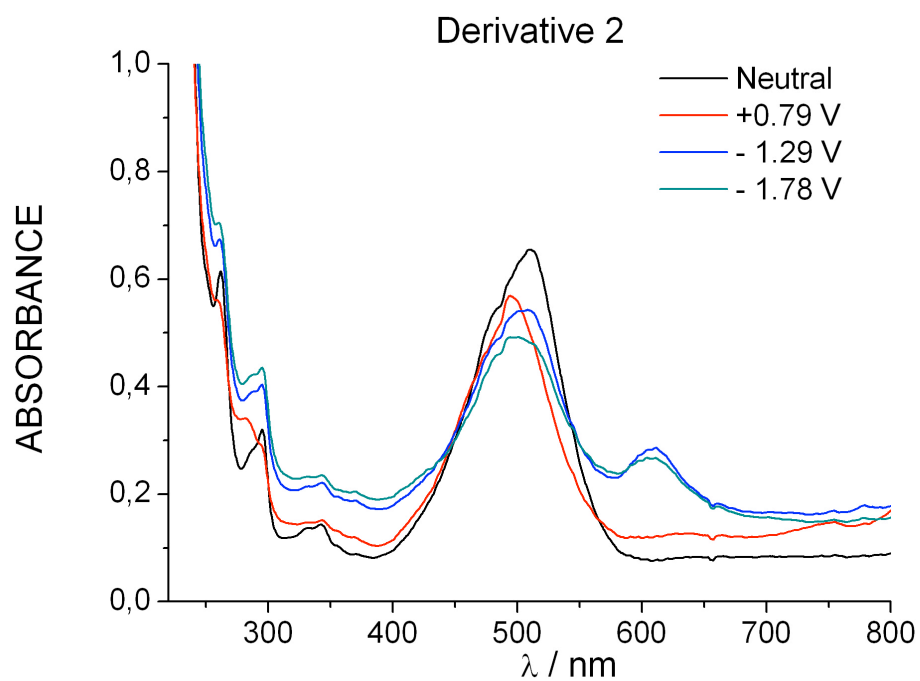

Figure S4. Spectroelectrochemical characterization of derivative **2**  $10^{-4}$  M solution in acetonitrile with 0.1 M tetrabutylammonium *p*-toluenesulfonate as the supporting electrolyte.

### 5.3. Derivative 3

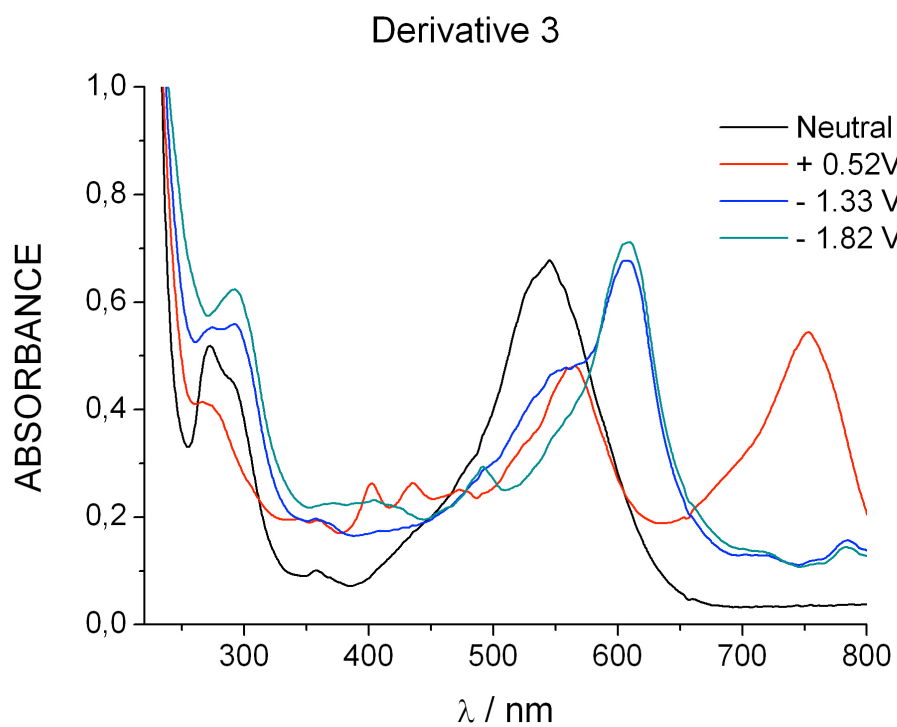

Figure S5. Spectroelectrochemical characterization of derivative **3**  $10^{-4}$  M solution in acetonitrile with 0.1 M tetrabutylammonium *p*-toluenesulfonate as the supporting electrolyte.

#### 5.4. Derivative 4

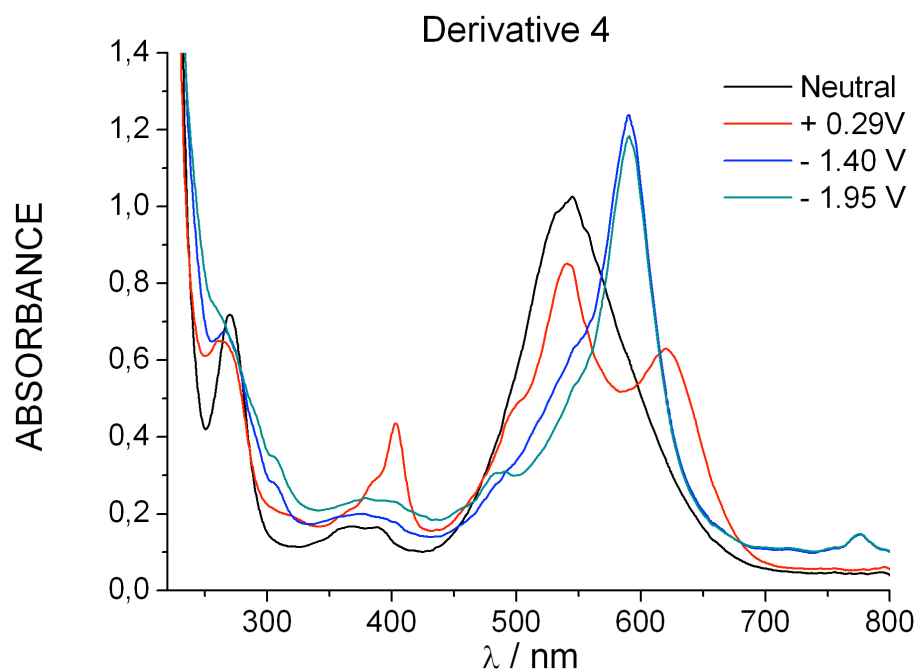

Figure S6. Spectroelectrochemical characterization of derivative **4**  $10^{-4}$  M solution in acetonitrile with 0.1 M tetrabutylammonium *p*-toluenesulfonate as the supporting electrolyte.

## 5.5. Derivative 5

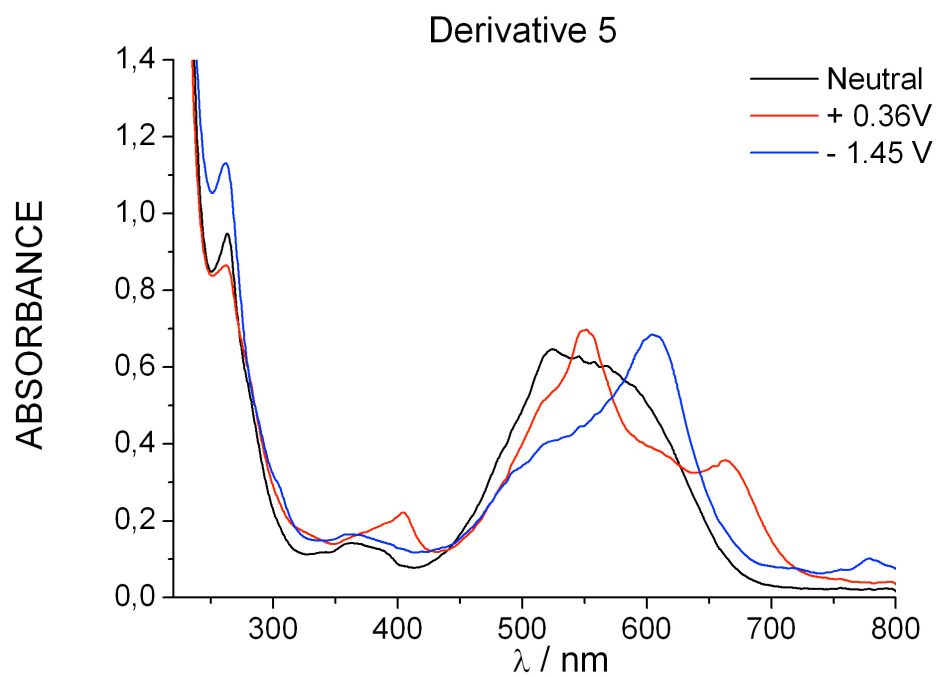

Figure S7. Spectroelectrochemical characterization of derivative **5**  $10^{-4}$  M solution in acetonitrile with 0.1 M tetrabutylammonium *p*-toluenesulfonate as the supporting electrolyte.

## 6. Characterization of derivative **1** photostability in Chloroform solution.

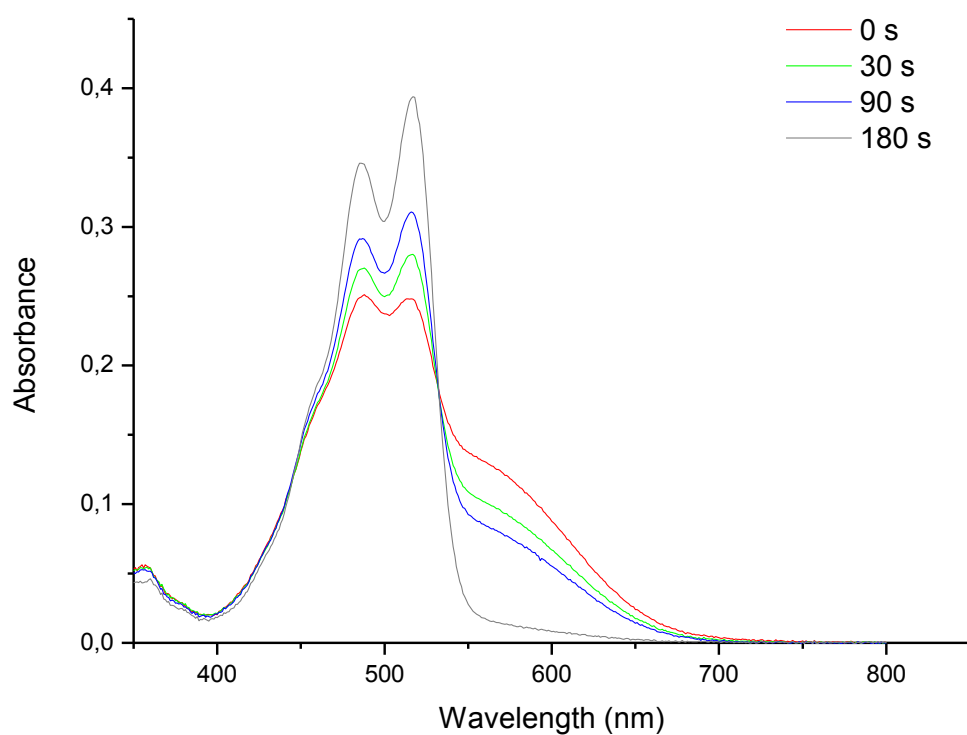

Figure S8. UV-Vis absorption spectra of an air equilibrated solution of derivative **1** in CHCl<sub>3</sub> as a function of the irradiation time under standard ambient diffused light.

## 7. General procedure for the LSC preparation.

In a typical procedure, 100 mg of AIBN were dissolved in 100 ml of freshly distilled MMA. The solution was placed in a beaker and slowly heated on a hot plate until the temperature of 80 °C was reached. This temperature was maintained for 5 minutes, during which time viscosity increased substantially. The solution was immediately transferred in an ice bath and cooled at 20°C. A solution of the appropriate perylen dye in freshly distilled MMA (60 ml) was added along with 15 mg of lauryl peroxide. The viscous syrup thus obtained was poured in a mould of 7 mm thickness and 100 cm<sup>2</sup> area and heated in a water bath at 56°C for 48 h. At the end of this thermal treatment the syrup turns into a solid slab that is further cured at 95°C for 24 h. After cooling, the slab can be easily separated by the glass mould and polished for optical measurements. Figure S8 shows an example of the setup we employed. In particular the slab shown contains derivative 4.

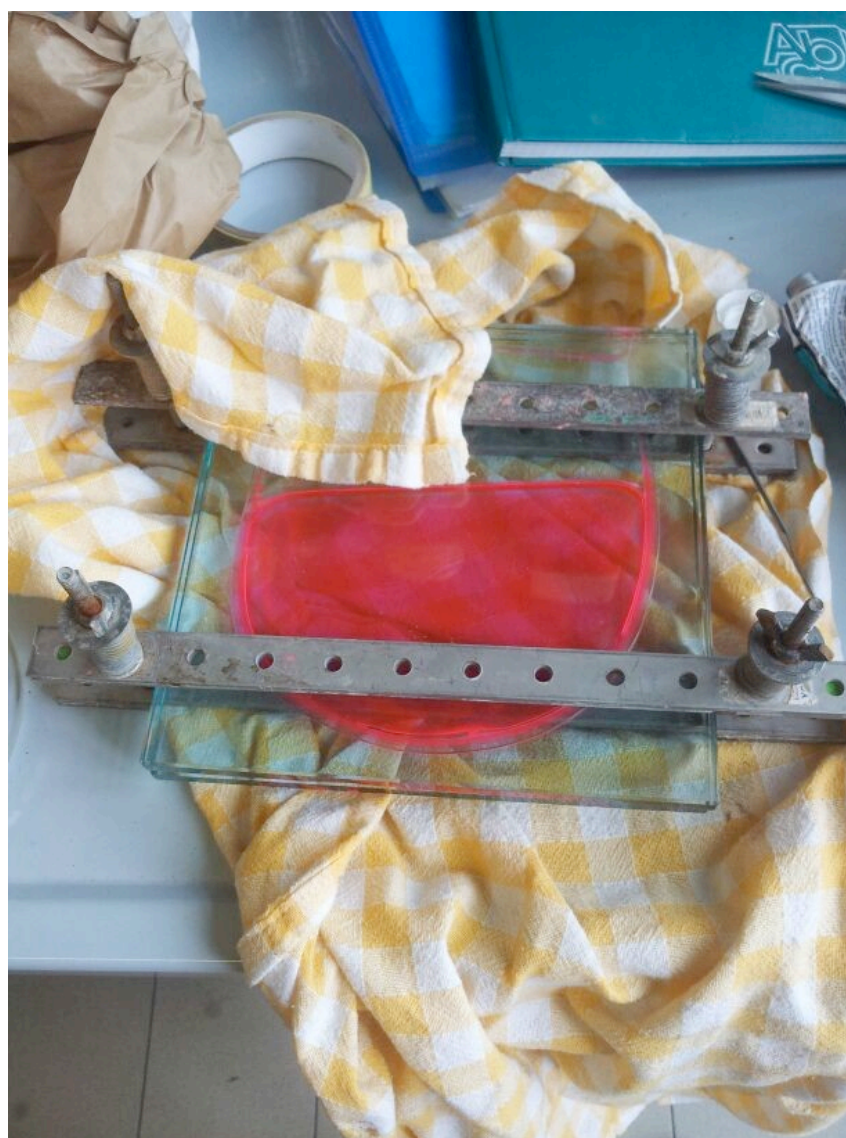

Figure S9. Experimental setup for the cell cating of the PMMA based LSC.

## **8. Details of the computational investigation.**

All DFT calculations were performed using the Q-Chem software suite.<sup>4</sup> Initial geometry optimizations were performed using the empirical EDF1 functional and 6-31G\*\* basis set, followed by optimization at the hybrid level with B3LYP paired with a 6-31G\*\* basis set. This protocol was followed for both neutral and cationic electronic configurations. The reported ground state dipole moments, HOMO and LUMO Kohn-Sham orbitals and eigenvalues were obtained from single-point B3LYP/6-31G\*\* calculations on the optimized neutral geometries.

B3LYP paired with polarized gaussian basis sets have previously been used to describe the ground and excited state energetics and geometries of functionalized perelyene diimides.<sup>5</sup> For ground state geometries, this level of theory has been shown to be highly accurate.<sup>6</sup> Similarly for MO energies this level of theory shows accurate trends in energy shifts with functionalization when compared with calculations done with larger basis sets.<sup>6</sup>



## 9. Details on the UPS measurements.

Glass slides (2.5 cm x 1.5 cm) were subsequently cleaned by sonication at 50° C in soapy water, deionized water, isopropanol, ethanol and acetone, then treated in an ozone plasma (residual pressure 400-500 mmHg) for 10 minutes to remove organic residues. After each of the following cleaning and processing steps the slides were flushed with dry 200 nm dust-filtered nitrogen. The substrates were then transferred in a nitrogen-filled glove box and 100 nm of silver (Silver slugs Premion 99.999% from Alfa-Aesar) were evaporated at a 0.2 Å/s rate. The various solutions ( $5 \times 10^{-3}$  M in anhydrous DCM) were spun-cast at 1500 rpm for 30 seconds. The materials were glued to a sample holder with copper tape, transferred in Desivac and moved to the prechamber of a Thermo Scientific ESCALAB 250Xi. After overnight pumping the substrates were moved to the main chamber and UPS scans measured (base pressure  $2 \times 10^{-8}$  atm, using He-I emission line at 21.22 eV while under -9 V bias). The spectra were collected and processed using Thermo Scientific Advantage 5.35.

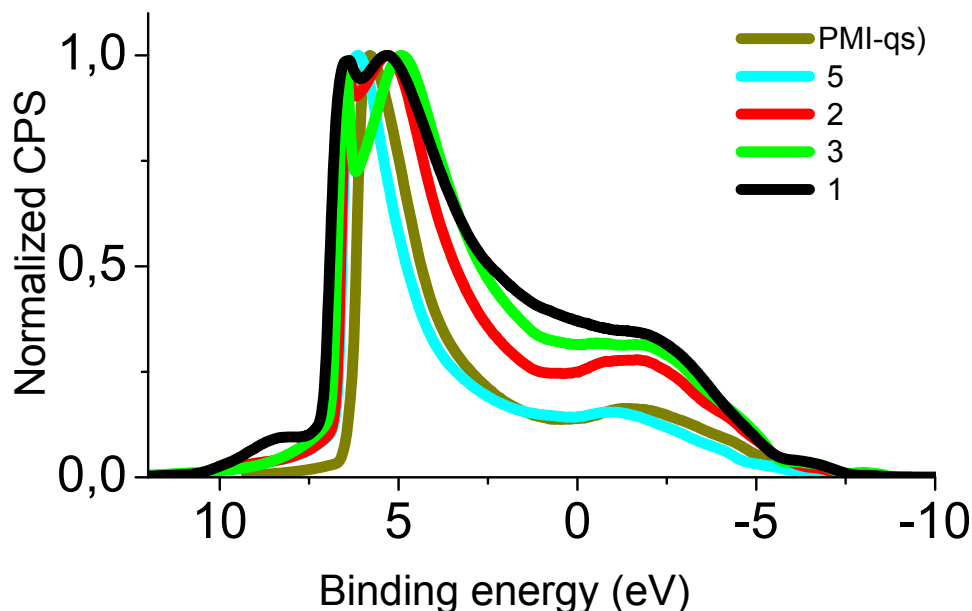

Figure S10. Full photoemission spectra of derivatives **PMI-qs**, **1,2,3** and **5**.

## 10. Supplementary data on time resolved transient absorption characterization of **5**.

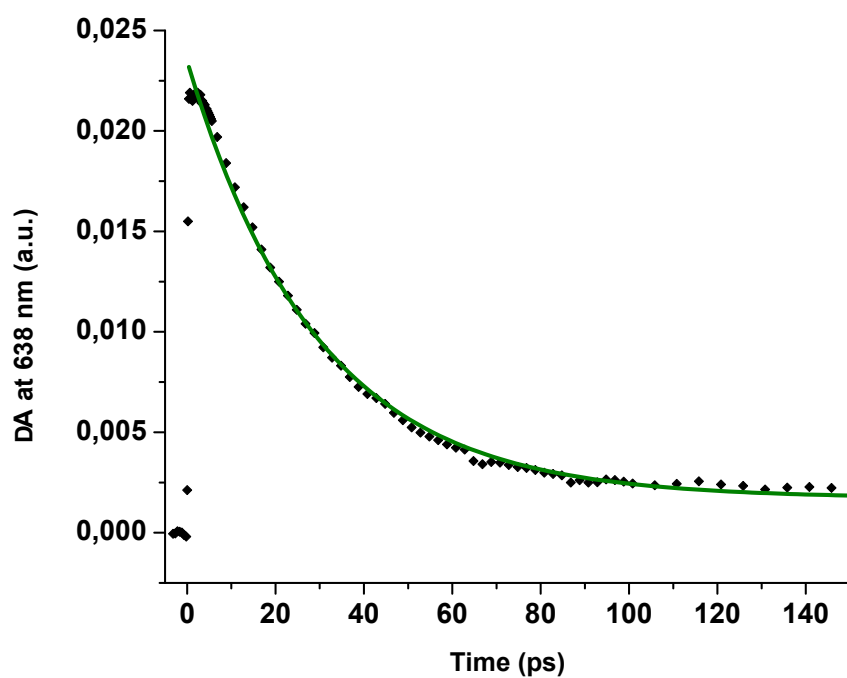

Figure S11. Time profiles of differential absorbance of a  $\text{CH}_2\text{Cl}_2$  solution of **5** at 638 nm. The fitting curve corresponds to a first order decay.

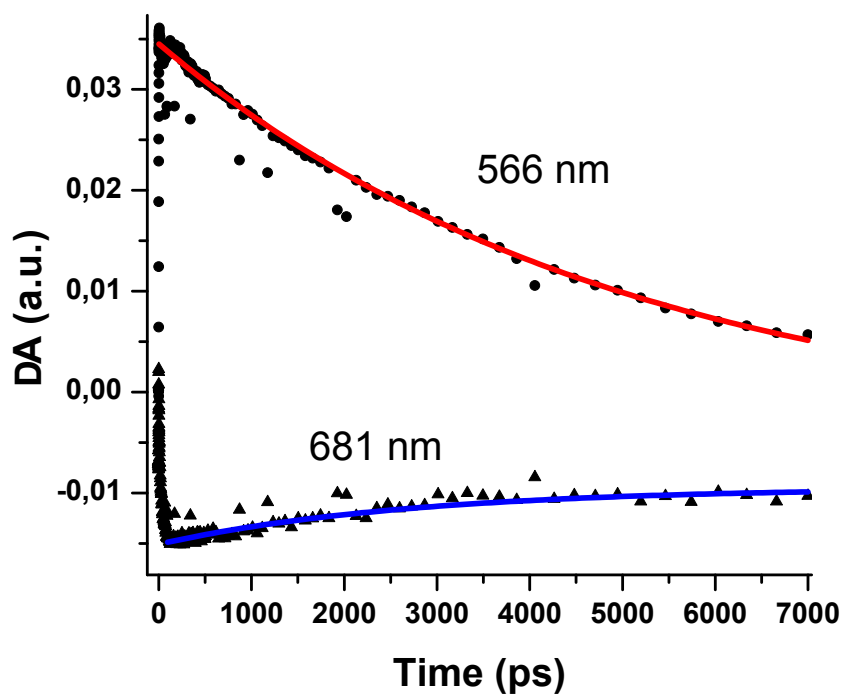

Figure S12. Time profiles of differential absorbance of a CH<sub>2</sub>Cl<sub>2</sub> solution of **5** at 566 nm (red) and 681 nm (blue). The fitting curves correspond to a first order decay.

**11. Figure S13.**

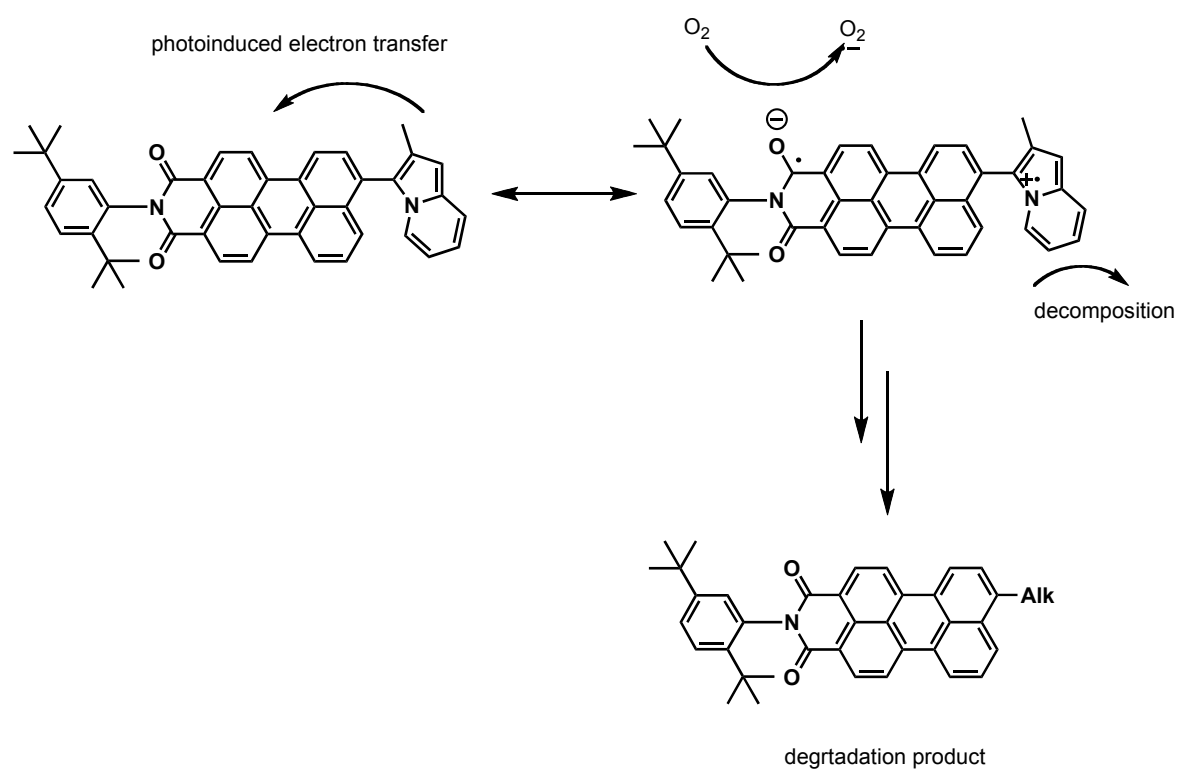

Figure S13. Tentative, unverified mechanism for the photochemical degradation of derivative **1**.

## **12. Details for the luminescence quantum yield measurements.**

Absolute quantum yield measurements were conducted following the well-known procedure described by de Mello et al.,<sup>7</sup> using a 405 nm (3.06 eV) pulsed diode laser with a repetition rate of 2 MHz (Edinburgh EPL405) and a Labsphere Spectraflex integrating sphere connected to a Hamamatsu mini-spectrometer through an optical fibre with a 600 nm core. The spectral response of the system (integrating sphere, optic fibre and spectrometer) was corrected by a calibrated tungsten halogen lamp (Ocean Optics LS-1-CAL).

### 13. References for the Supporting Information.

---

- <sup>1</sup> H. Langhals, *Tetrahedron Letters*, 1995, **36**, 6423–6424.
- <sup>2</sup> Y. Nagao et al. *Dyes and pigments*, 1991, **16**, 19–25.
- <sup>3</sup> A. Sanguineti et al. *Chem. Commun.*, 2013, **49**, 1618–1620
- <sup>4</sup> Shao et al. *Phys. Chem. Chem. Phys.* 2006, **8**, 3172-3191.
- <sup>5</sup> Clark et al. *J. Am. Chem. Soc.* 2007, **129**, 7586-7595.
- <sup>6</sup> Delgado et al. *J. Am. Chem. Soc.* 2010, **132**, 3375-3387.
- <sup>7</sup> J. C. deMello, H. F. Wittmann, R. H. Friend, *Adv. Mater.* 1997, 9, 230.
